# Supplementary material for: Towards multivalent CD1d ligands: synthesis and biological activity of homodimeric α-galactosyl ceramide analogues
Source: PubMed Central journal article supplement (PMC3413882; doi:10.1016/j.carres.2012.02.034), 2012-07-15

**Towards Multivalent CD1d Ligands: Synthesis and Biological Activity of Homodimeric  $\alpha$ -  
Galactosyl Ceramide Analogues**

**Peter J. Jervis *et al.***

**Scanned  $^1\text{H-NMR}$  and  $^{13}\text{C-NMR}$  Spectra**

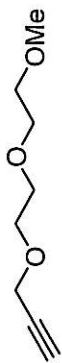

**9b**, 300 MHz,  
CDCl<sub>3</sub>

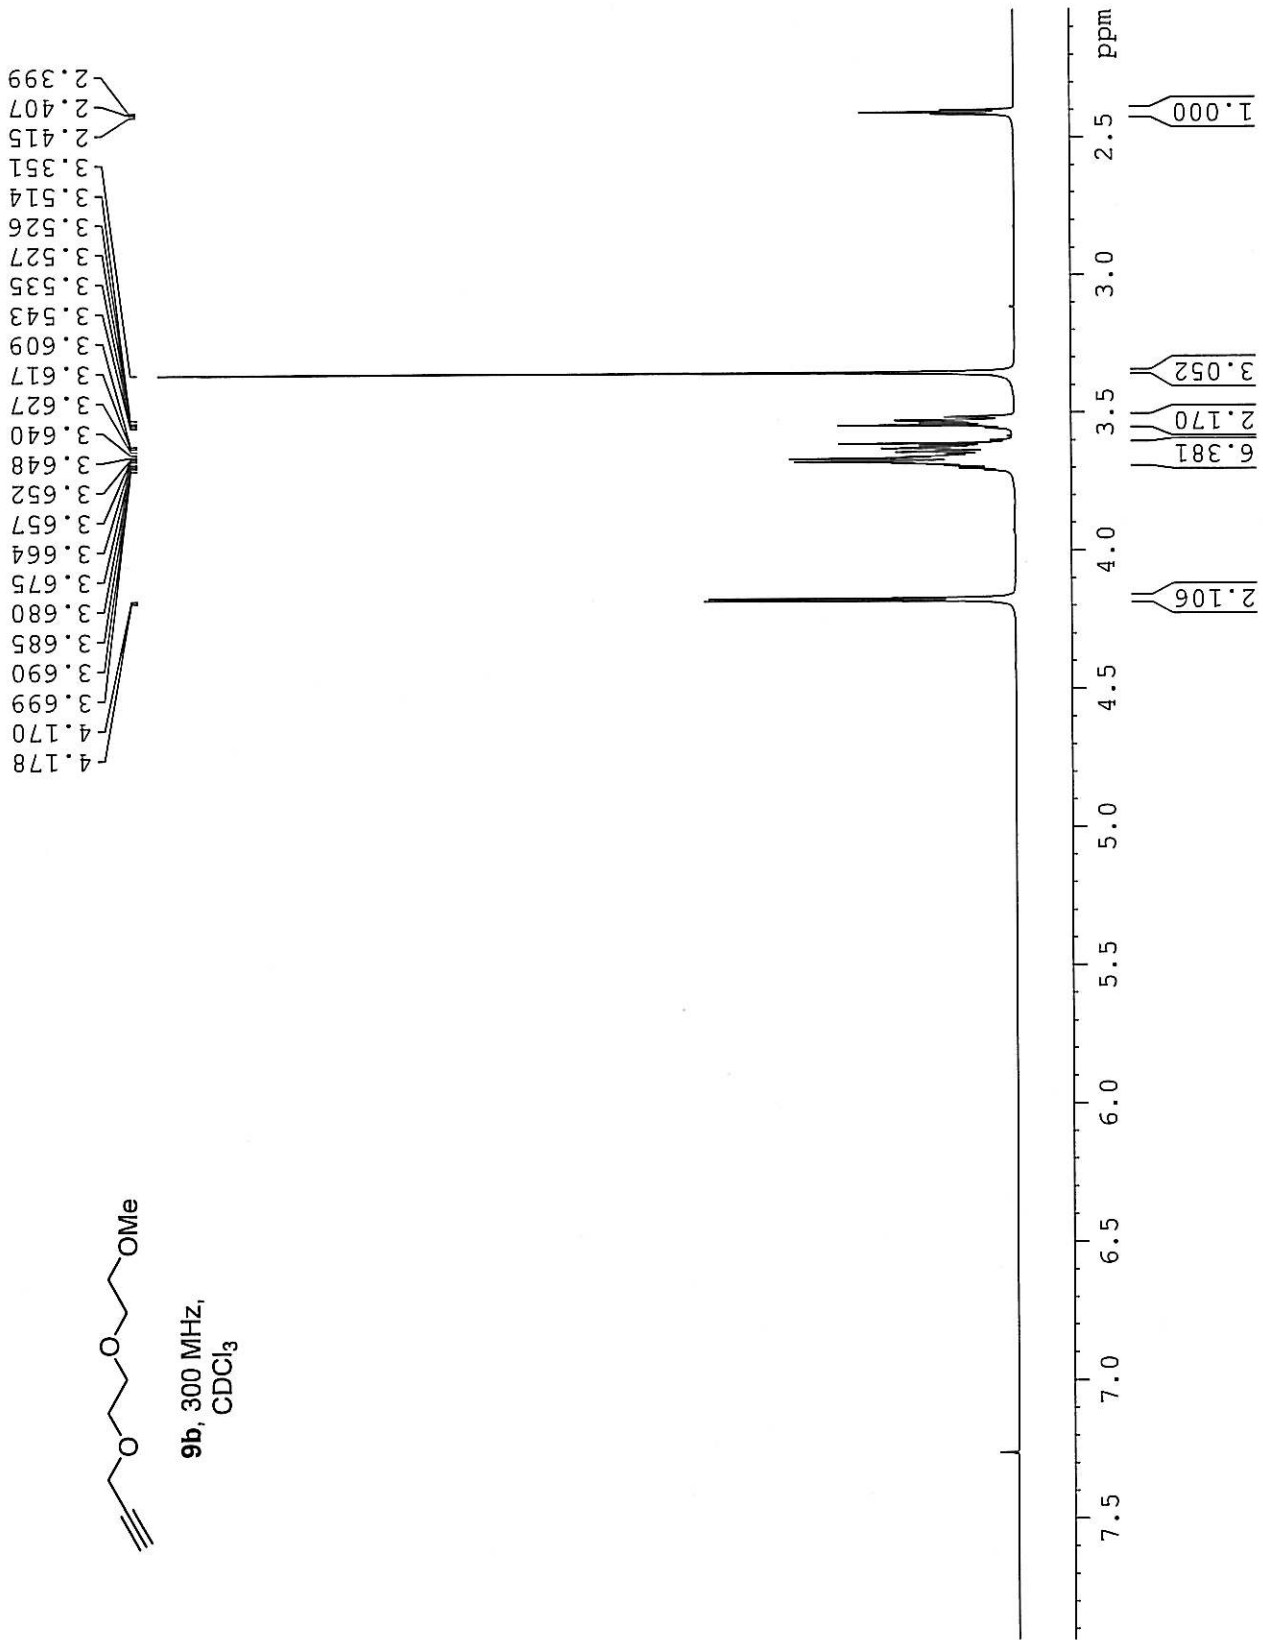

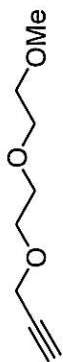

**9b**, 75 MHz,  
CDCl<sub>3</sub>

79.567  
74.419  
71.828  
70.464  
70.342  
69.027  
58.936  
58.307

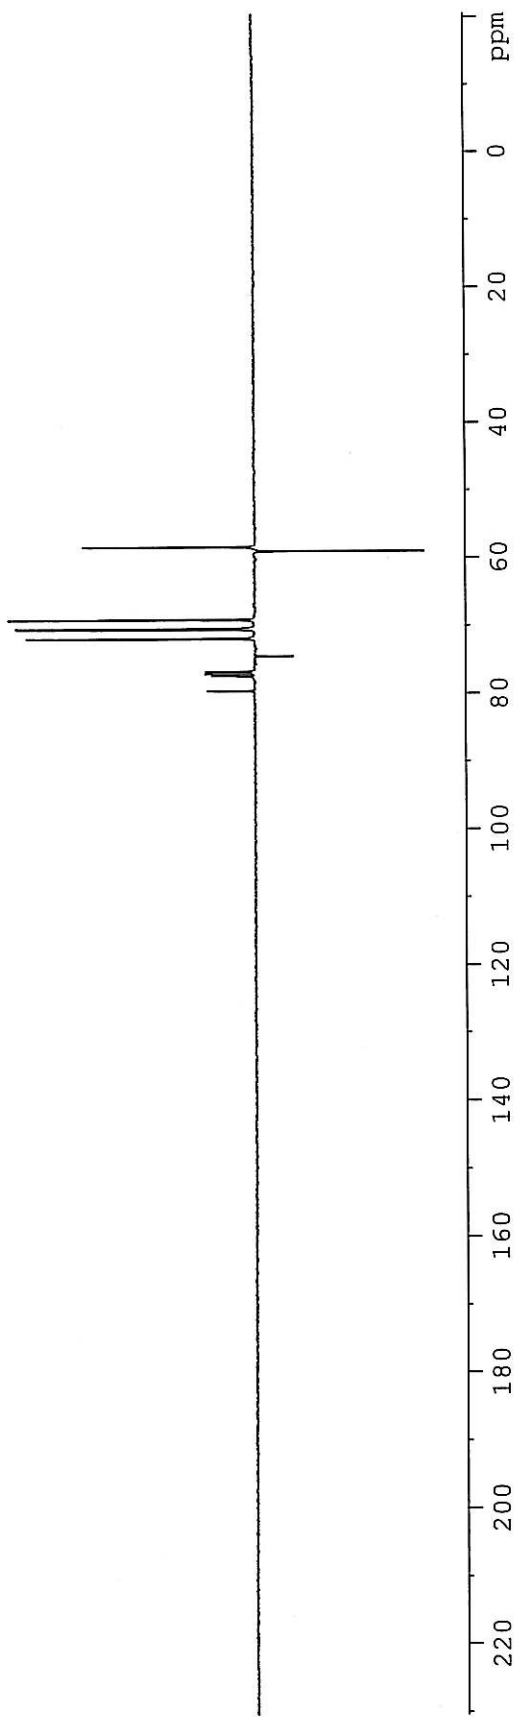

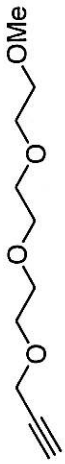

9c, 300 MHz,  
CDCl<sub>3</sub>

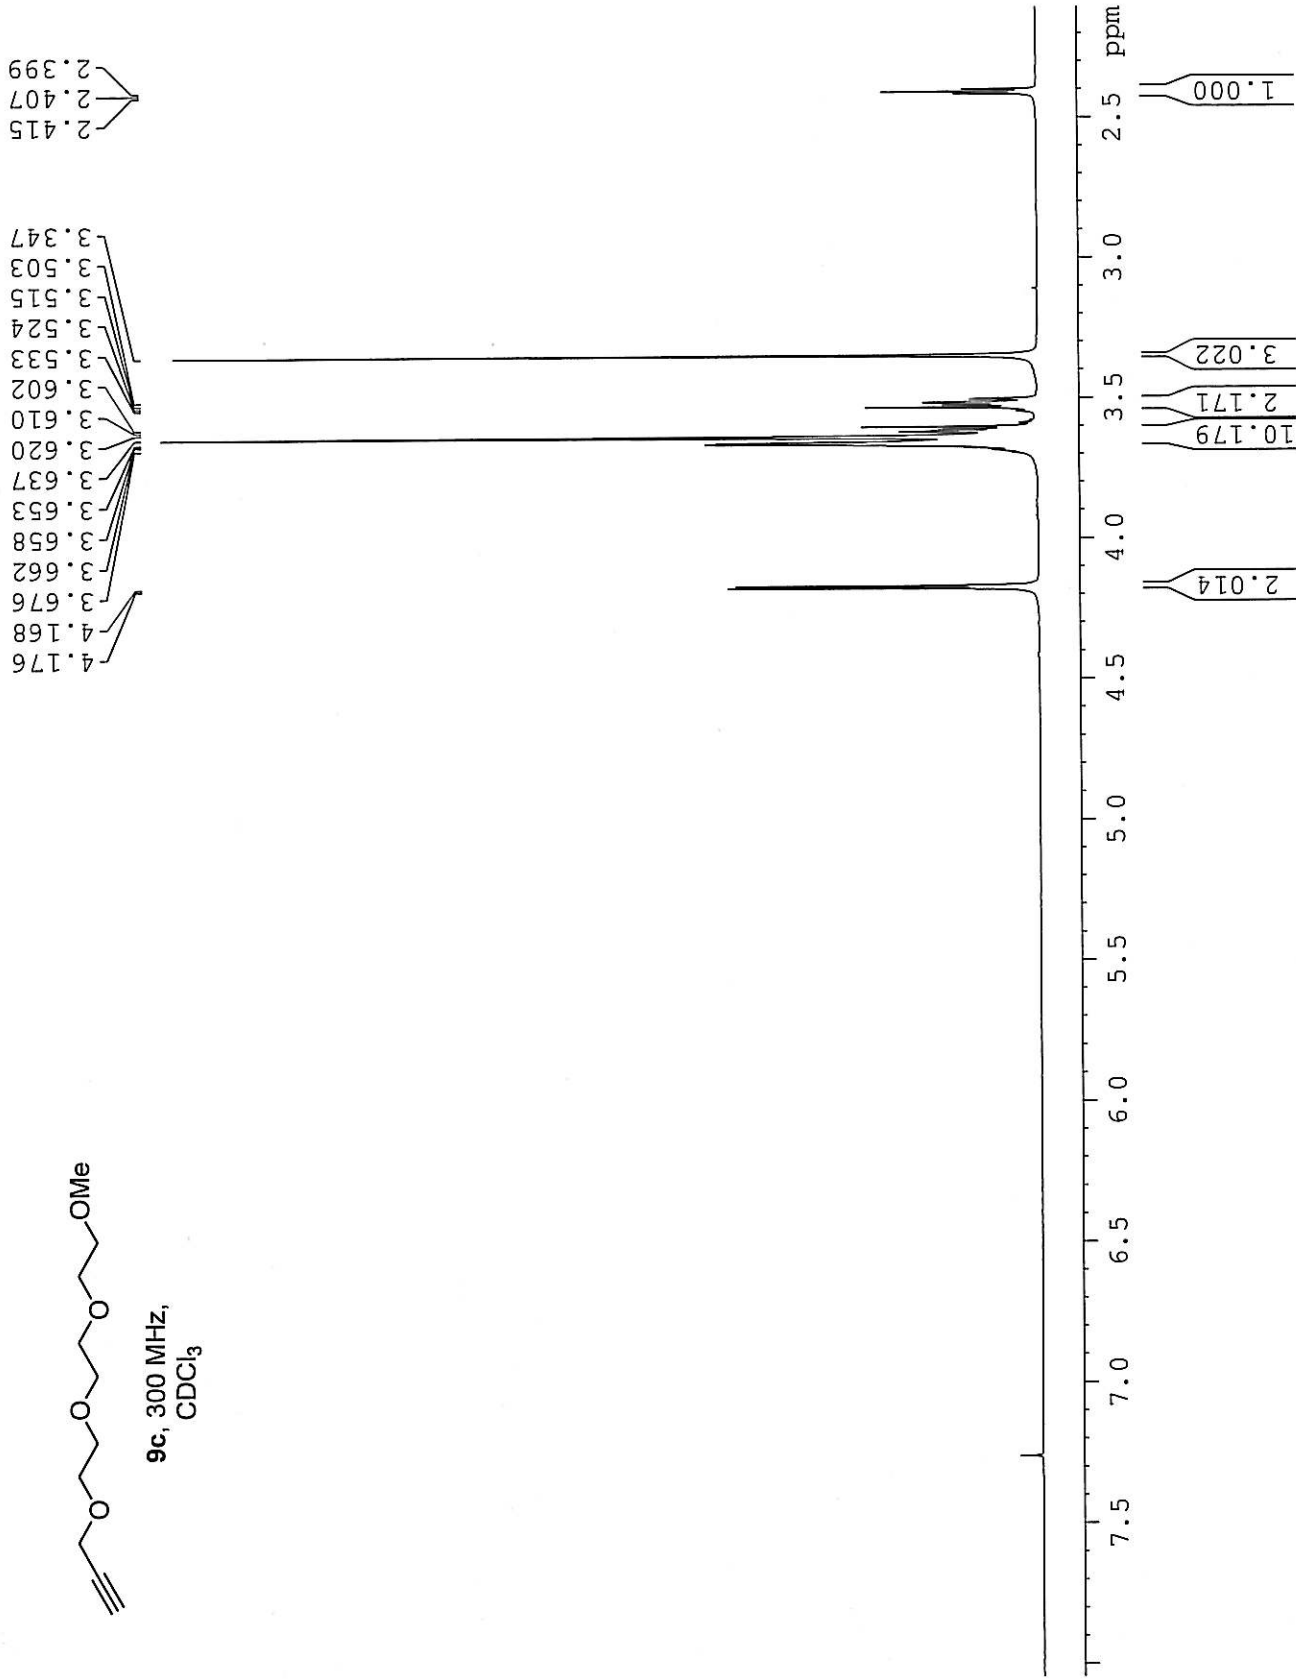

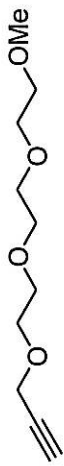

**9c**, 75 MHz,  
CDCl<sub>3</sub>

- 79.572
- 74.404
- 71.836
- 70.503
- 70.427
- 70.311
- 69.007
- 58.919
- 58.291

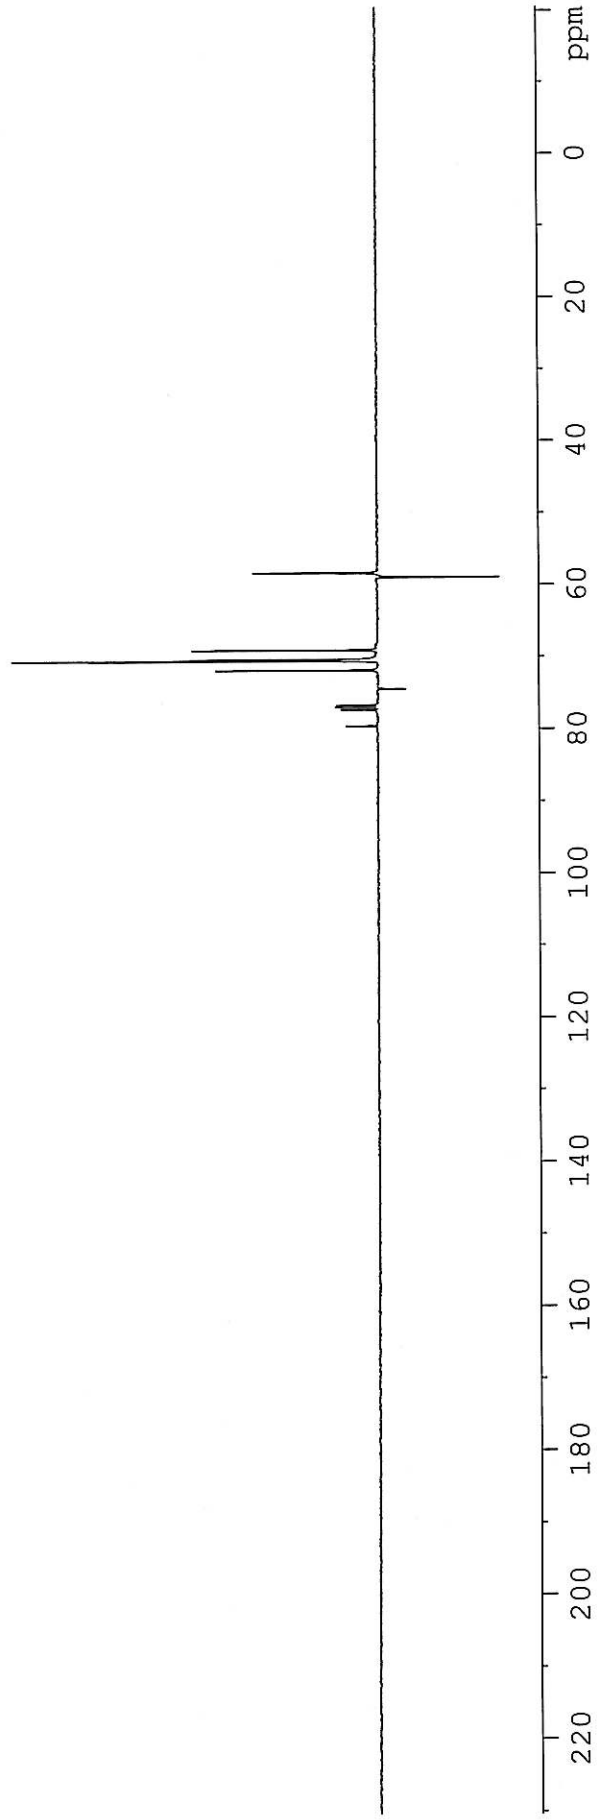





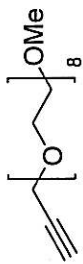

9e, 300 MHz,  
CDCl<sub>3</sub>

4.152  
4.144  
3.660  
3.651  
3.641  
3.636  
3.632  
3.627  
3.624  
3.603  
3.593  
3.583  
3.574  
3.507  
3.499  
3.490  
3.478  
3.476  
3.323  
2.414  
2.406  
2.398

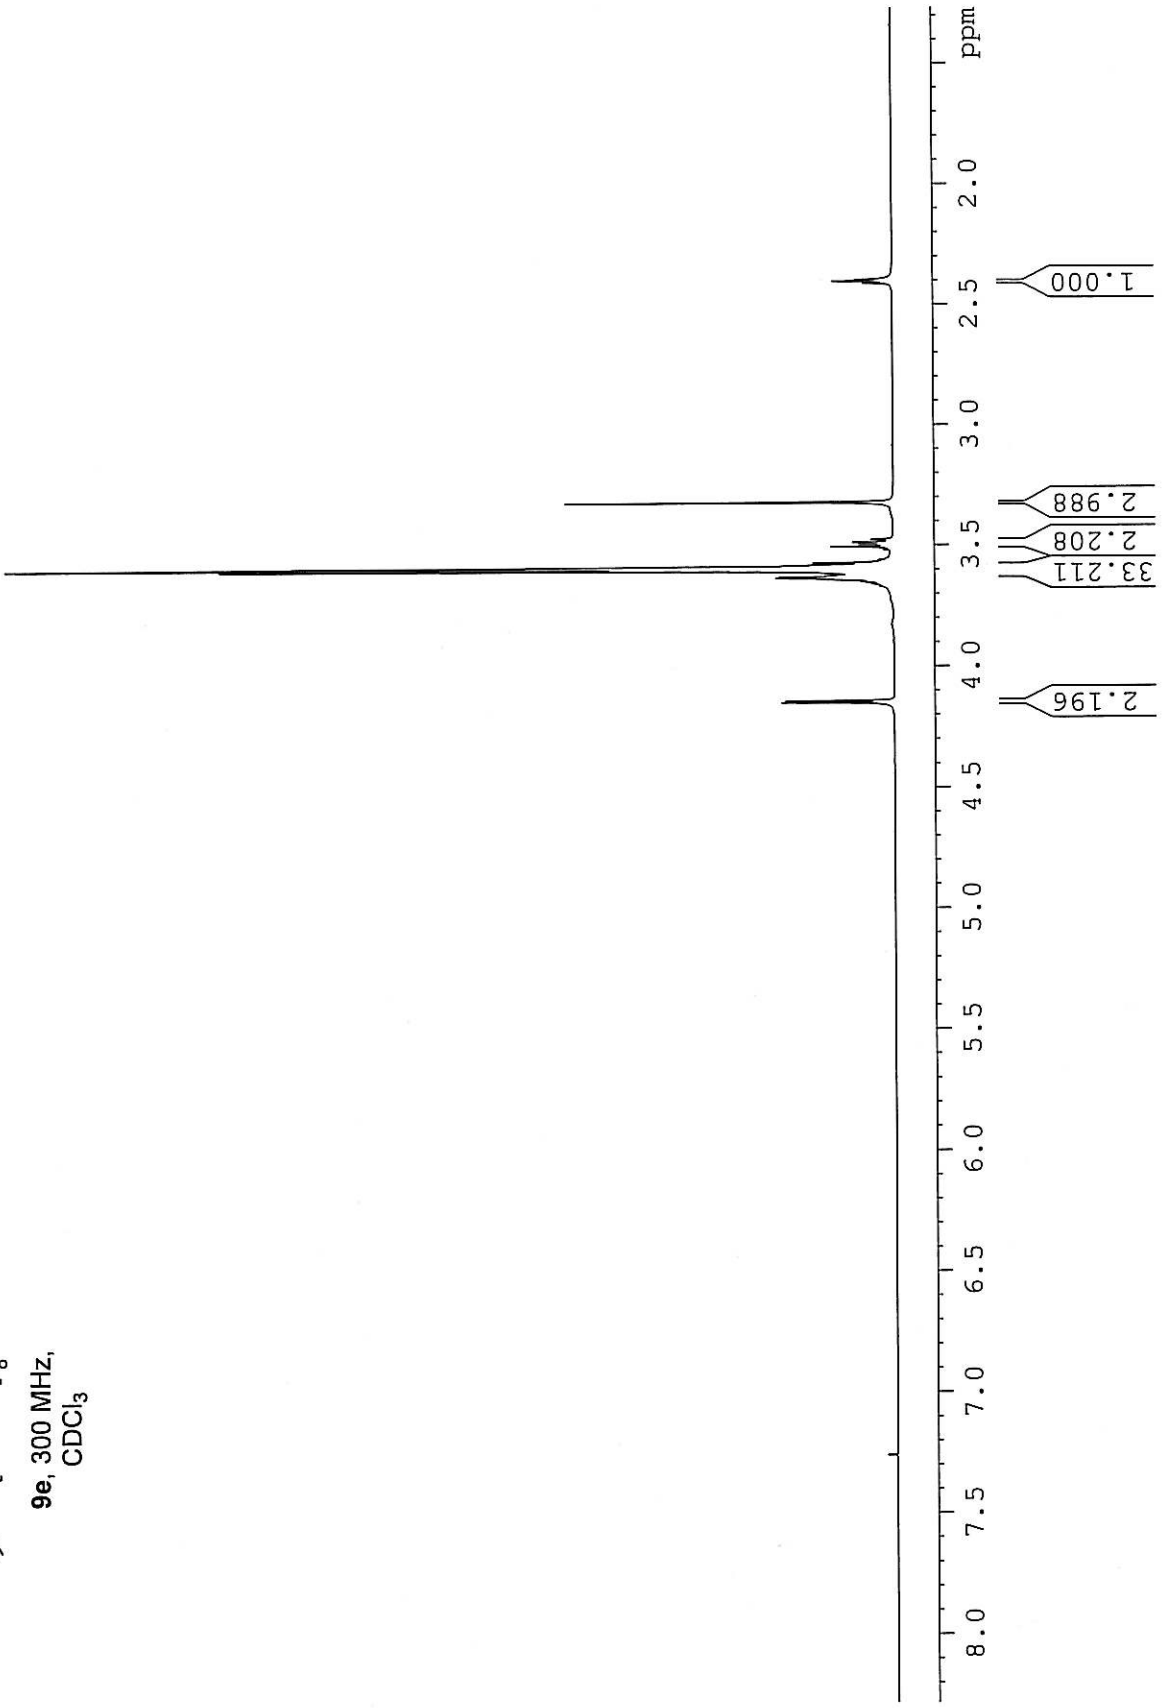





7.782  
7.294  
7.265  
4.855  
4.842  
4.577  
4.569  
4.560  
4.543  
4.518  
4.184  
4.160  
4.139  
4.094  
4.078  
4.045  
3.798  
3.794  
3.765  
3.753  
3.706  
3.695  
3.674  
3.662  
3.507  
3.489  
3.471  
3.453  
3.442  
3.427  
3.388  
3.379  
3.365  
3.348  
2.153  
2.128  
2.102  
1.596  
1.571  
1.548  
1.529  
1.222  
0.863  
0.842  
0.819

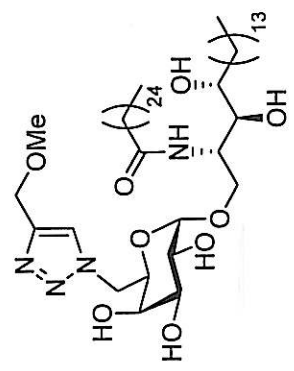

**10a**, 300 MHz,  
CDCl<sub>3</sub>/CD<sub>3</sub>OD 2:1

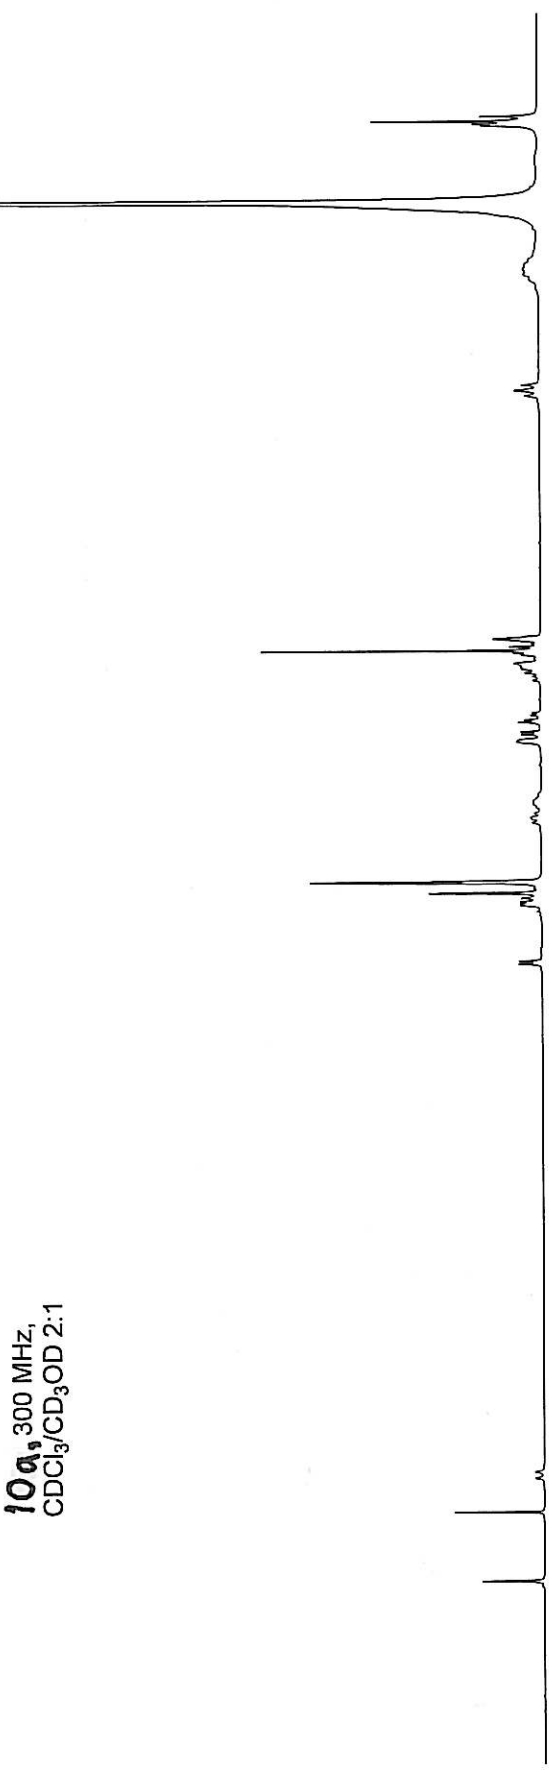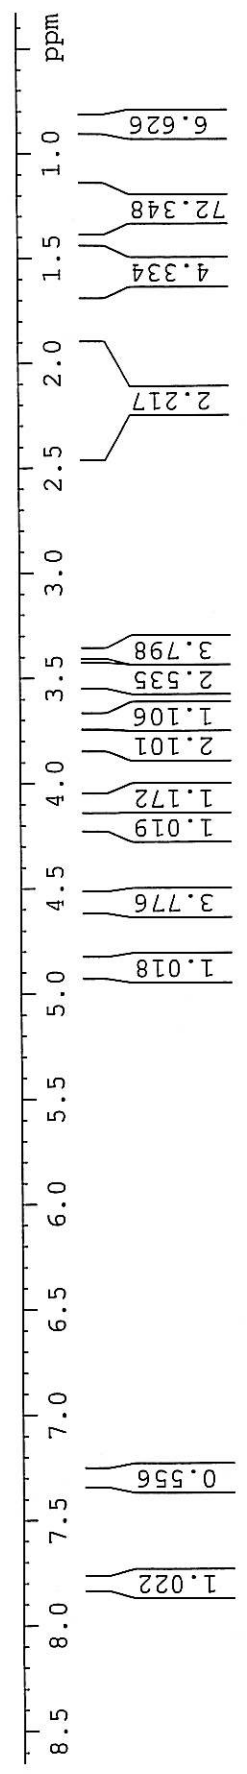

14.230  
 22.999  
 26.203  
 29.700  
 30.045  
 32.269  
 32.998  
 36.785  
 50.463  
 51.314  
 58.373  
 65.815  
 67.463  
 69.002  
 69.740  
 69.835  
 70.264  
 72.268  
 75.058

99.967

124.970

144.779

174.731

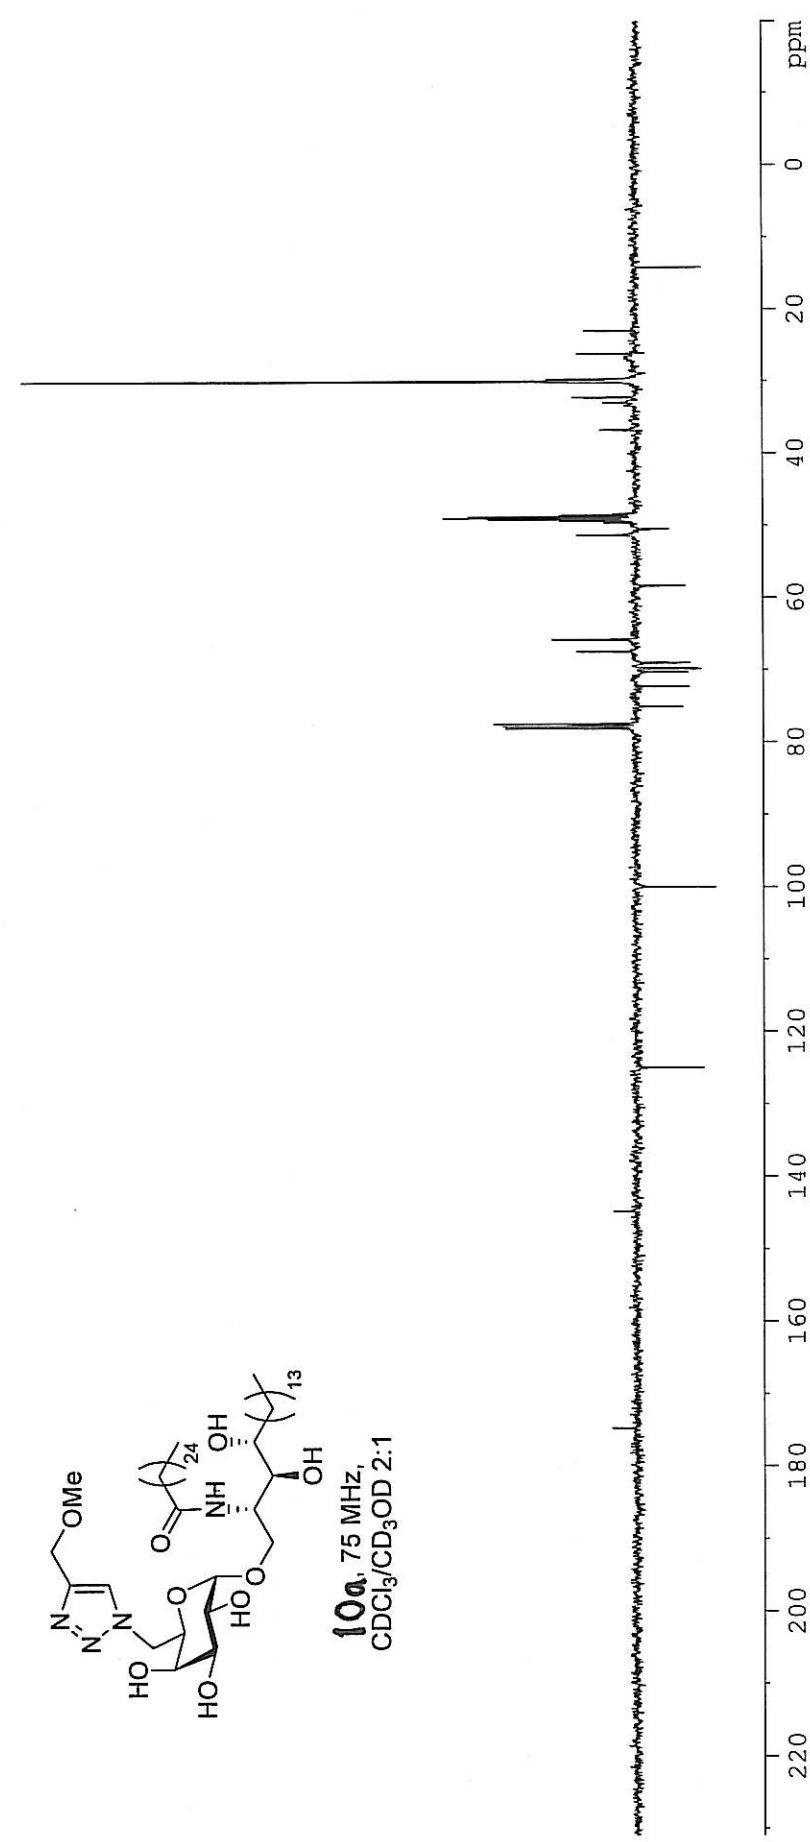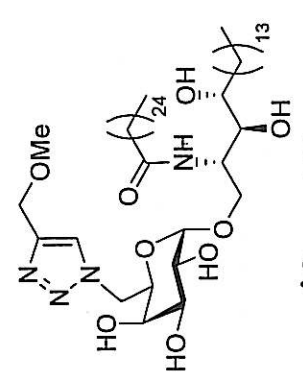

**10a**, 75 MHz,  
 CDCl<sub>3</sub>/CD<sub>3</sub>OD 2:1

7.798  
 4.851  
 4.841  
 4.620  
 4.566  
 4.558  
 4.554  
 4.538  
 4.188  
 4.170  
 4.097  
 4.086  
 3.793  
 3.783  
 3.768  
 3.758  
 3.705  
 3.697  
 3.681  
 3.672  
 3.656  
 3.650  
 3.639  
 3.638  
 3.627  
 3.621  
 3.613  
 3.605  
 3.599  
 3.541  
 3.535  
 3.527  
 3.523  
 3.519  
 3.509  
 3.496  
 3.483  
 3.451  
 3.438  
 3.388  
 3.377  
 3.361  
 3.349  
 2.153  
 2.148  
 2.131  
 2.115  
 2.111  
 1.572  
 1.551  
 1.537  
 1.504  
 0.859  
 0.843  
 0.825

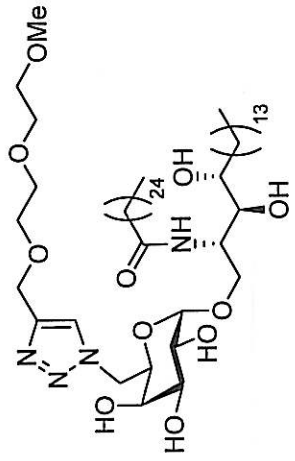

**10b**, 300 MHz,  
 CDCl<sub>3</sub>/CD<sub>3</sub>OD 2:1

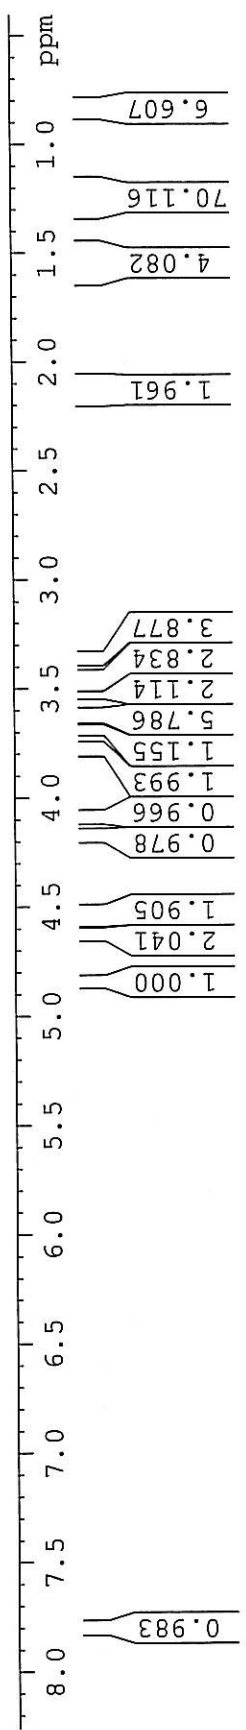

14.243  
 23.003  
 26.214  
 29.704  
 29.792  
 30.054  
 32.274  
 32.939  
 36.787  
 50.429  
 51.257  
 59.075  
 64.549  
 67.514  
 69.007  
 69.703  
 69.805  
 69.976  
 70.270  
 70.673  
 70.725  
 72.152  
 72.271  
 75.002  
 99.985

125.077  
 144.971  
 174.697

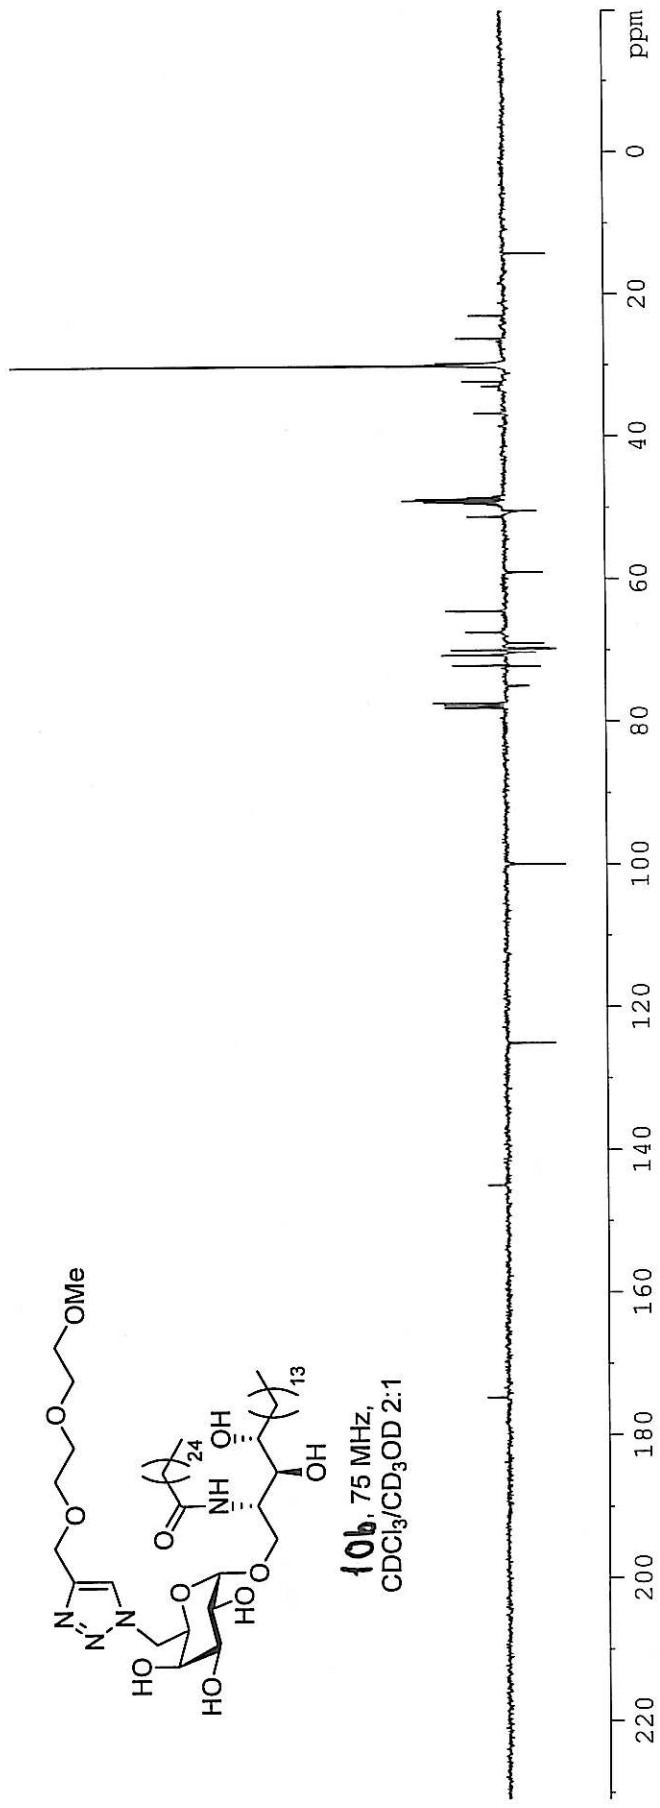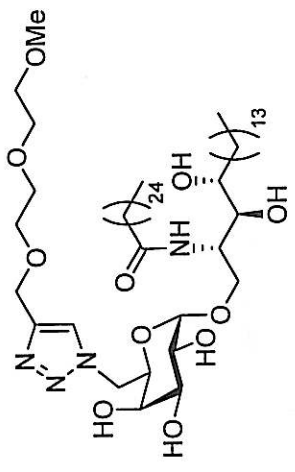

**10b**, 75 MHz,  
 CDCl<sub>3</sub>/CD<sub>3</sub>OD 2:1

7.801  
7.321  
7.291  
4.857  
4.844  
4.620  
4.570  
4.565  
4.553  
4.539  
4.192  
4.169  
4.148  
4.096  
4.079  
4.072  
3.801  
3.785  
3.768  
3.756  
3.710  
3.699  
3.639  
3.624  
3.619  
3.608  
3.603  
3.600  
3.595  
3.548  
3.543  
3.535  
3.525  
3.514  
3.512  
3.488  
3.471  
3.454  
3.438  
3.397  
3.382  
3.351  
3.321  
3.315  
3.310  
3.305  
3.300  
3.158  
2.133  
2.108  
1.572  
1.551  
1.531  
0.865  
0.859  
0.843

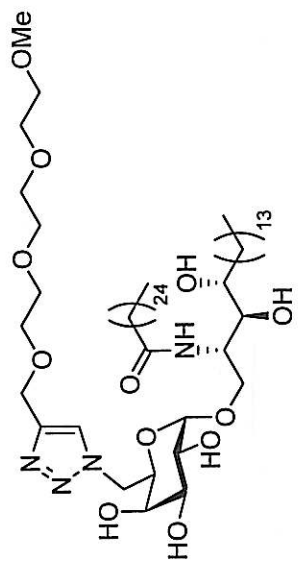

**10c**, 300 MHz,  
CDCl<sub>3</sub>/CD<sub>3</sub>OD 2:1

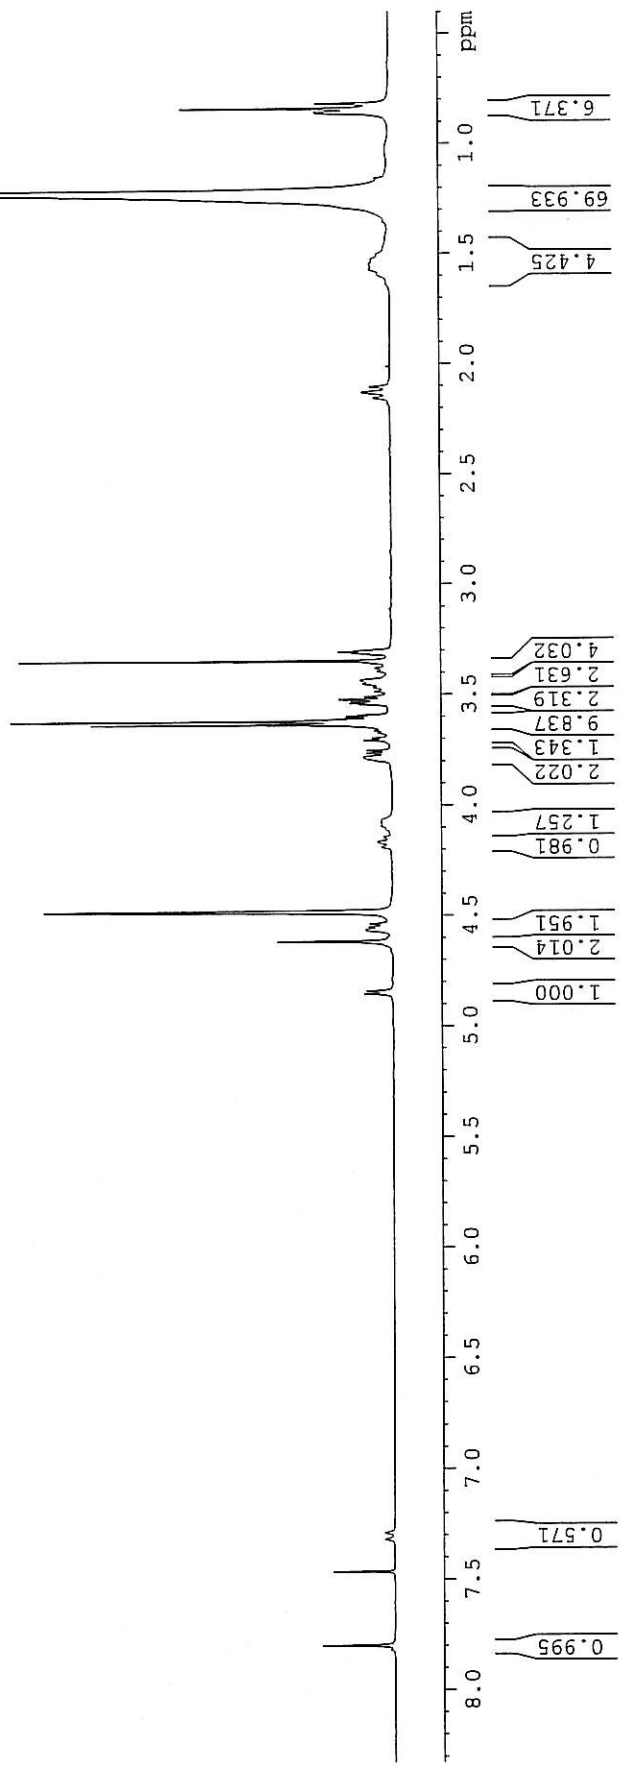

14.246  
 23.019  
 26.235  
 29.720  
 29.812  
 30.072  
 32.291  
 32.943  
 36.801  
 50.463  
 51.278  
 59.087  
 64.555  
 67.516  
 69.030  
 69.732  
 69.838  
 70.004  
 70.284  
 70.666  
 70.738  
 70.801  
 72.169  
 72.280  
 74.985  
 100.010

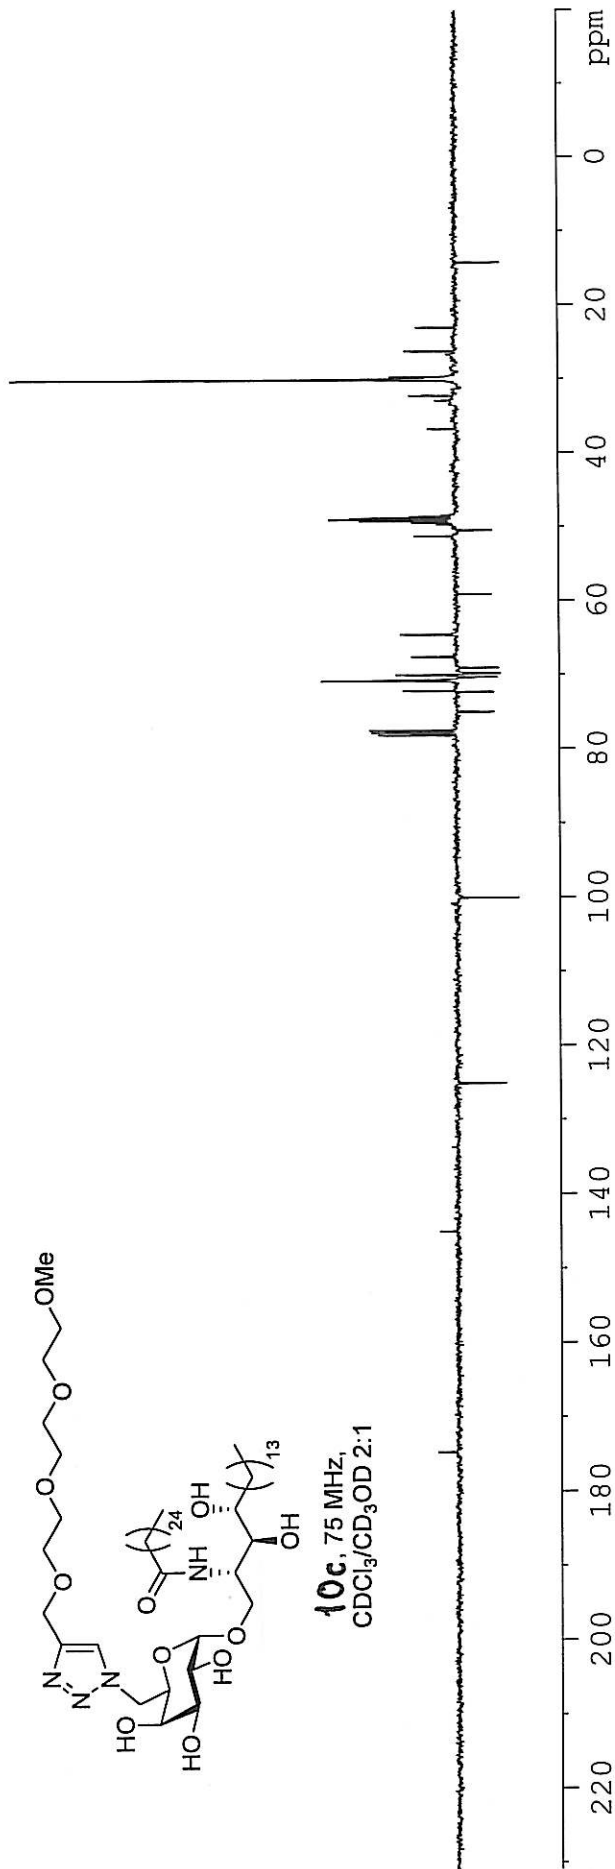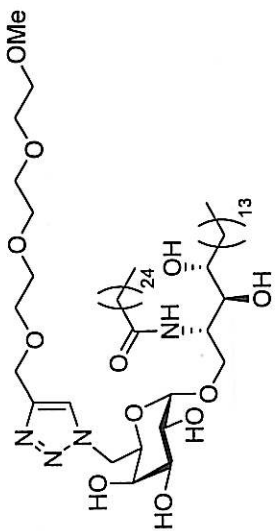

**10c**, 75 MHz,  
 CDCl<sub>3</sub>/CD<sub>3</sub>OD 2:1

0.844  
 0.859  
 0.865  
 1.224  
 1.529  
 1.551  
 1.569  
 2.107  
 2.132  
 2.156  
 3.348  
 3.366  
 3.387  
 3.401  
 3.445  
 3.457  
 3.472  
 3.490  
 3.509  
 3.511  
 3.522  
 3.525  
 3.532  
 3.535  
 3.539  
 3.544  
 3.591  
 3.596  
 3.603  
 3.621  
 3.635  
 3.668  
 3.678  
 3.701  
 3.712  
 3.757  
 3.769  
 3.783  
 3.790  
 3.802  
 3.802  
 4.062  
 4.077  
 4.092  
 4.153  
 4.174  
 4.197  
 4.540  
 4.552  
 4.566  
 4.569  
 4.619  
 4.843  
 4.855

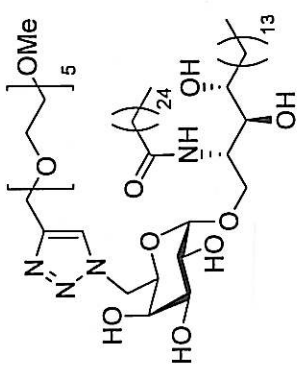

**10d**, 300 MHz,  
 CDCl<sub>3</sub>/CD<sub>3</sub>OD 2:1

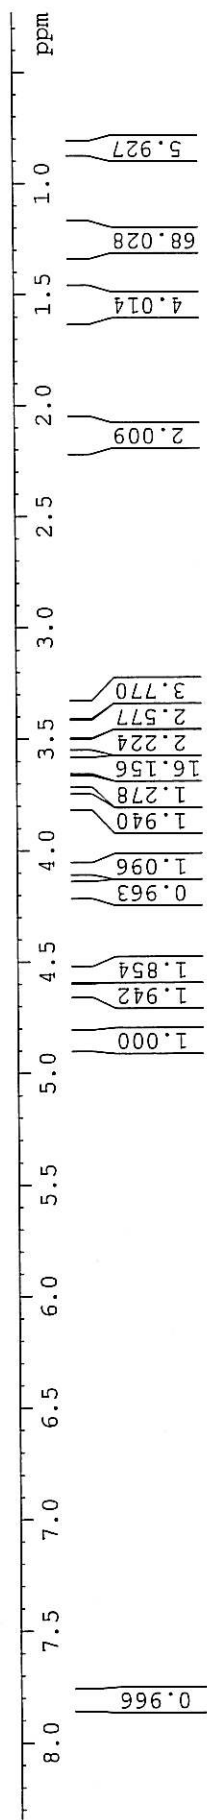



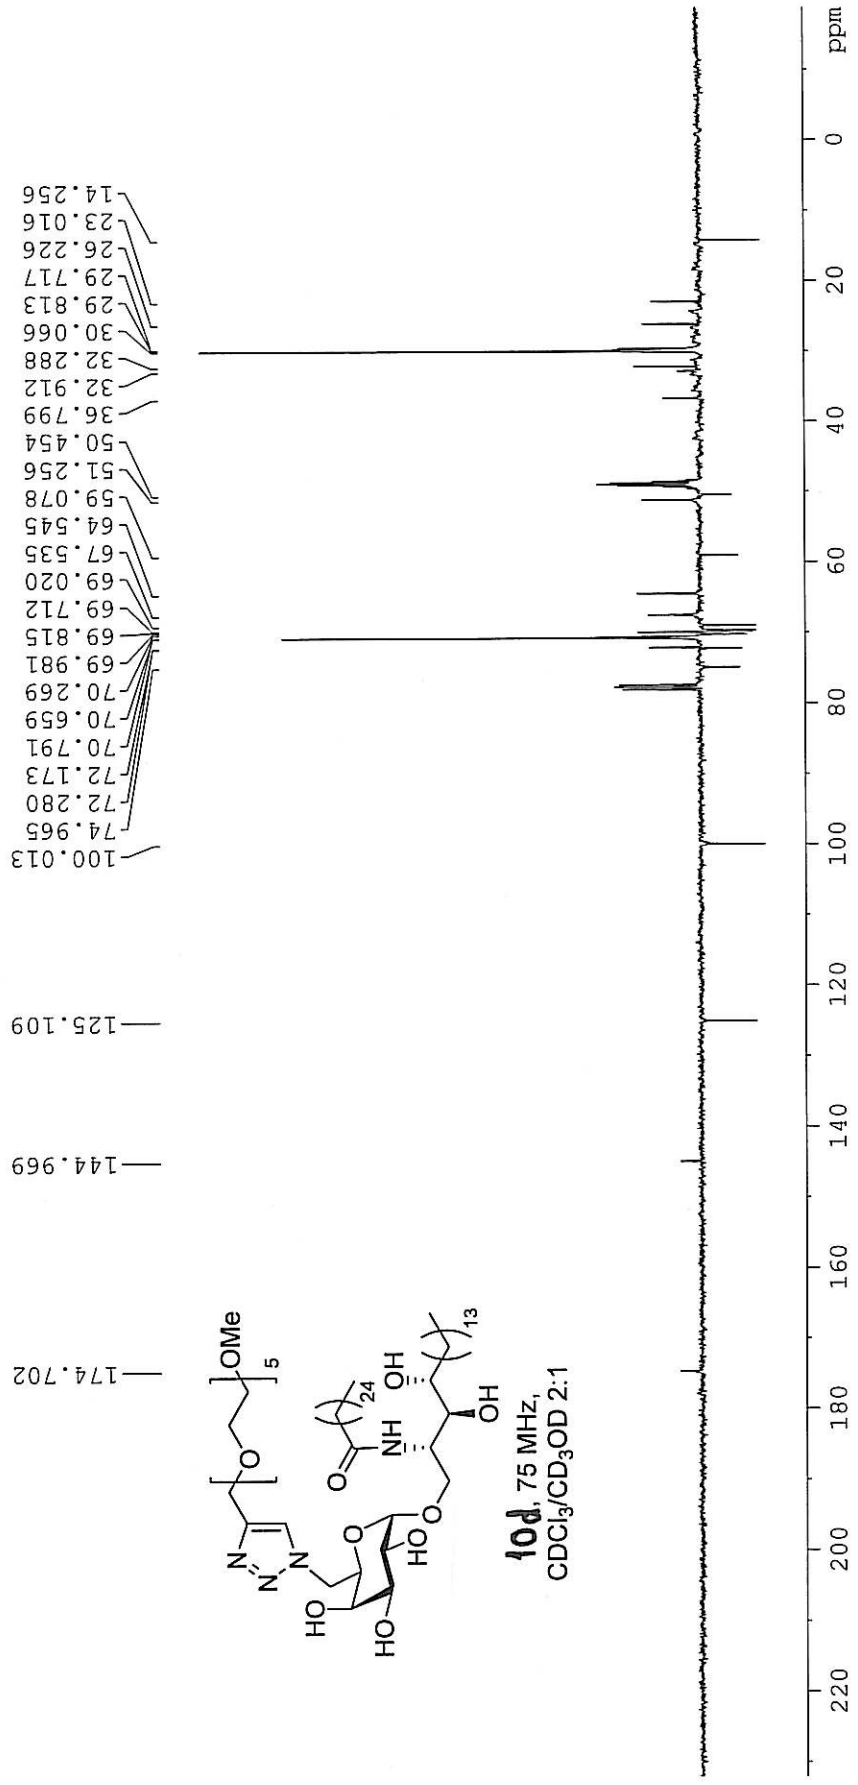

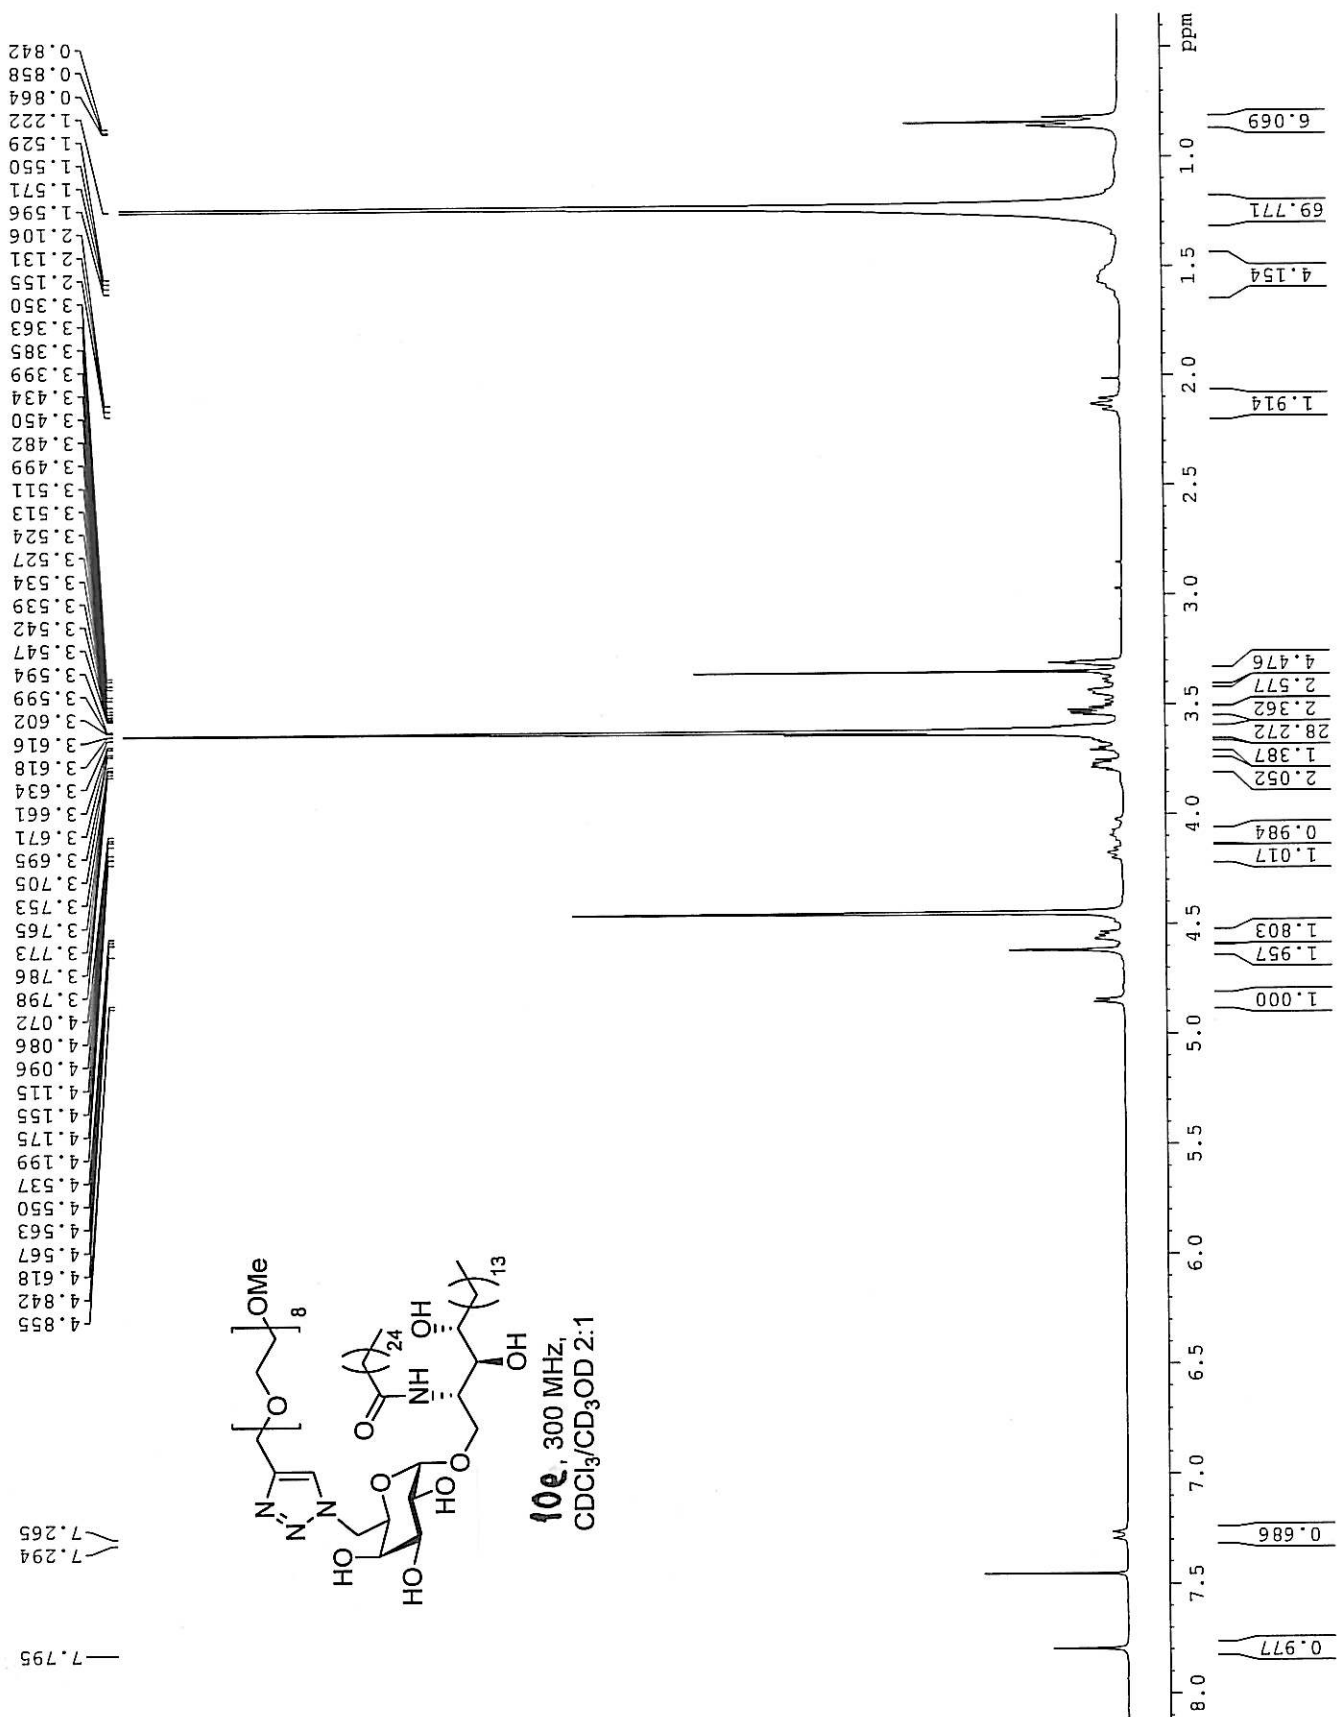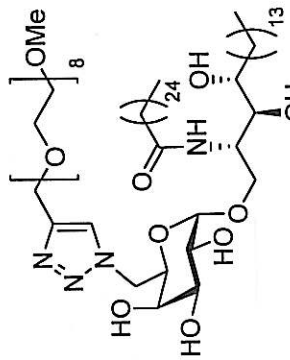

14.240  
22.996  
26.202  
29.695  
30.047  
32.265  
32.961  
36.786  
50.425  
51.217  
59.083  
64.546  
67.539  
69.007  
69.658  
69.774  
69.977  
70.251  
70.781  
72.169  
72.267  
75.008  
100.008

125.089

144.970

174.676

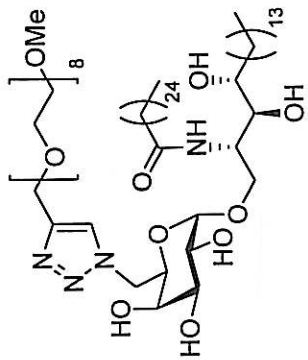

**10e**, 75 MHz,  
CDCl<sub>3</sub>/CD<sub>3</sub>OD 2:1

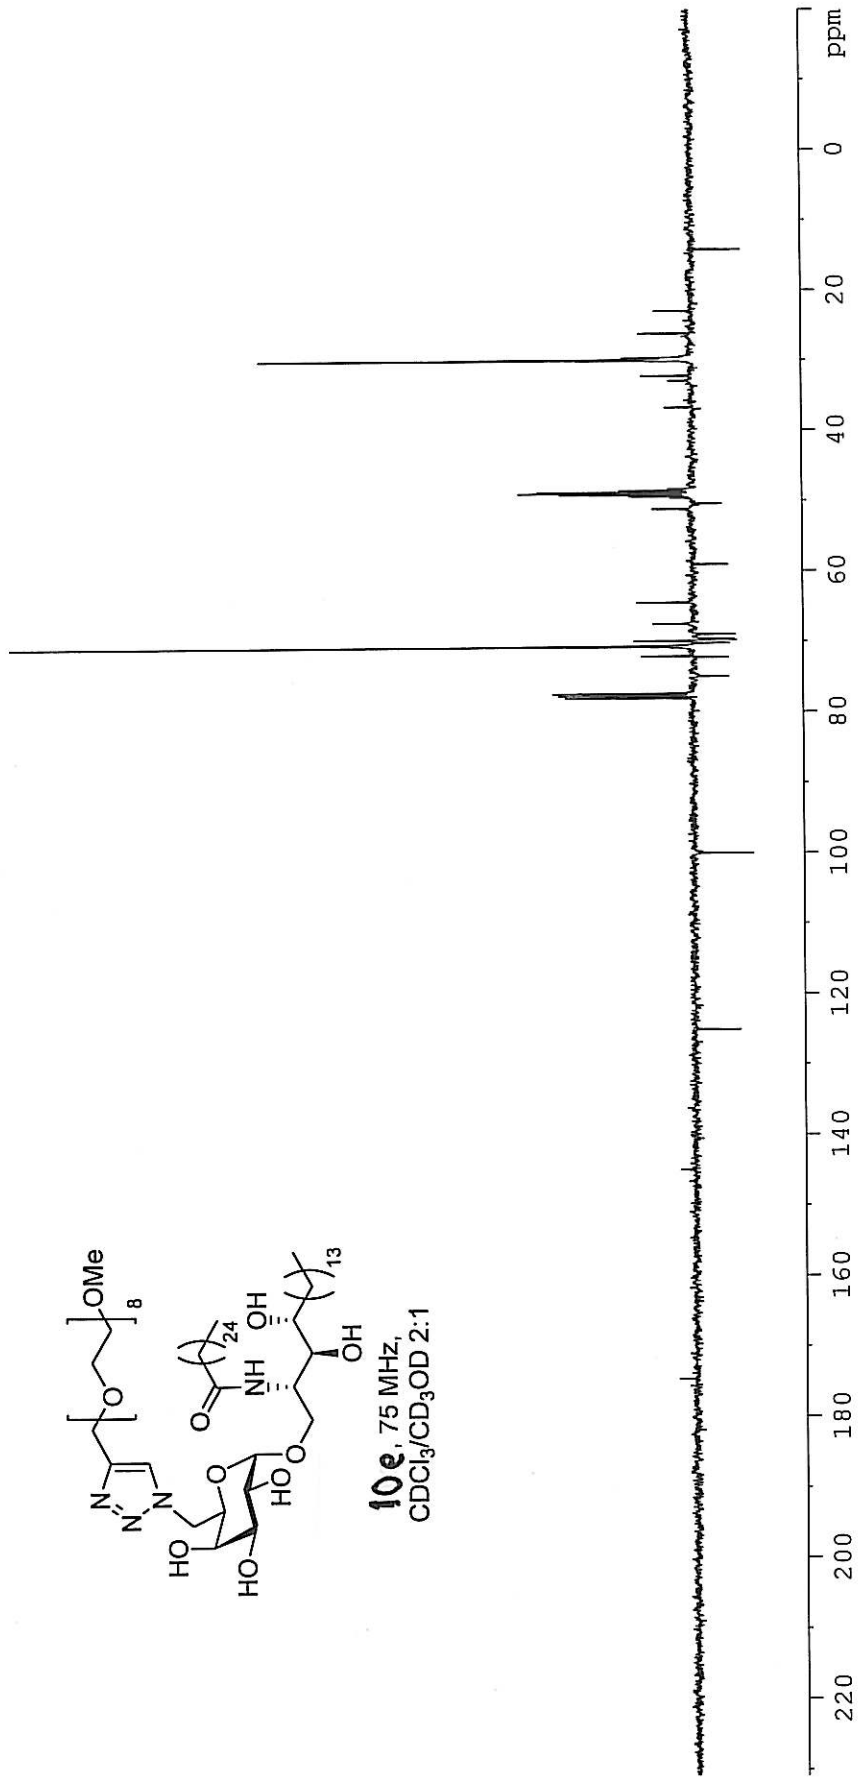

7.516  
7.309  
7.280  
4.864  
4.852  
4.630  
4.612  
4.604  
4.579  
4.561  
4.184  
4.158  
4.138  
4.092  
3.801  
3.788  
3.776  
3.768  
3.756  
3.706  
3.696  
3.672  
3.662  
3.530  
3.511  
3.494  
3.476  
3.461  
3.448  
3.398  
3.384  
3.363  
3.348  
2.668  
2.643  
2.616  
2.154  
2.129  
2.103  
1.611  
1.586  
1.557  
1.225  
0.865  
0.860  
0.844  
0.821

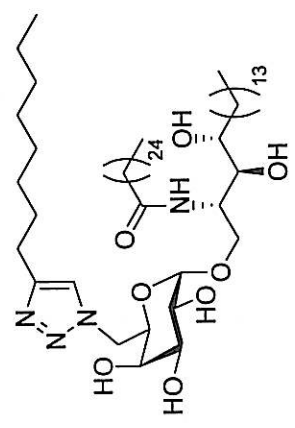

12, 300 MHz,  
CDCl<sub>3</sub>/CD<sub>3</sub>OD 2:1

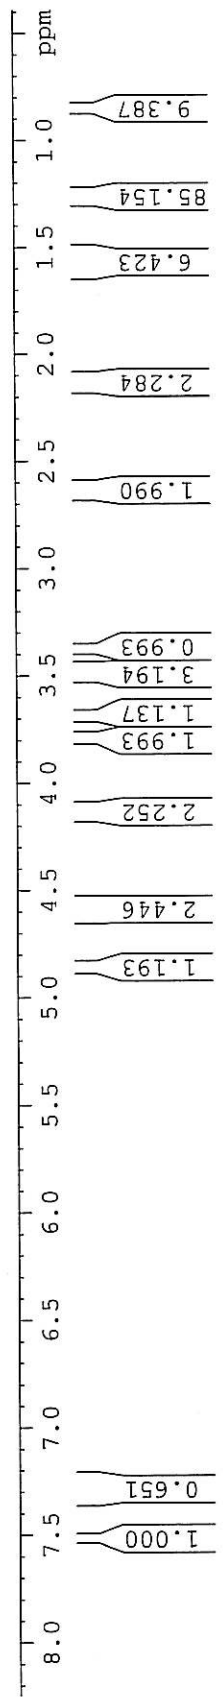

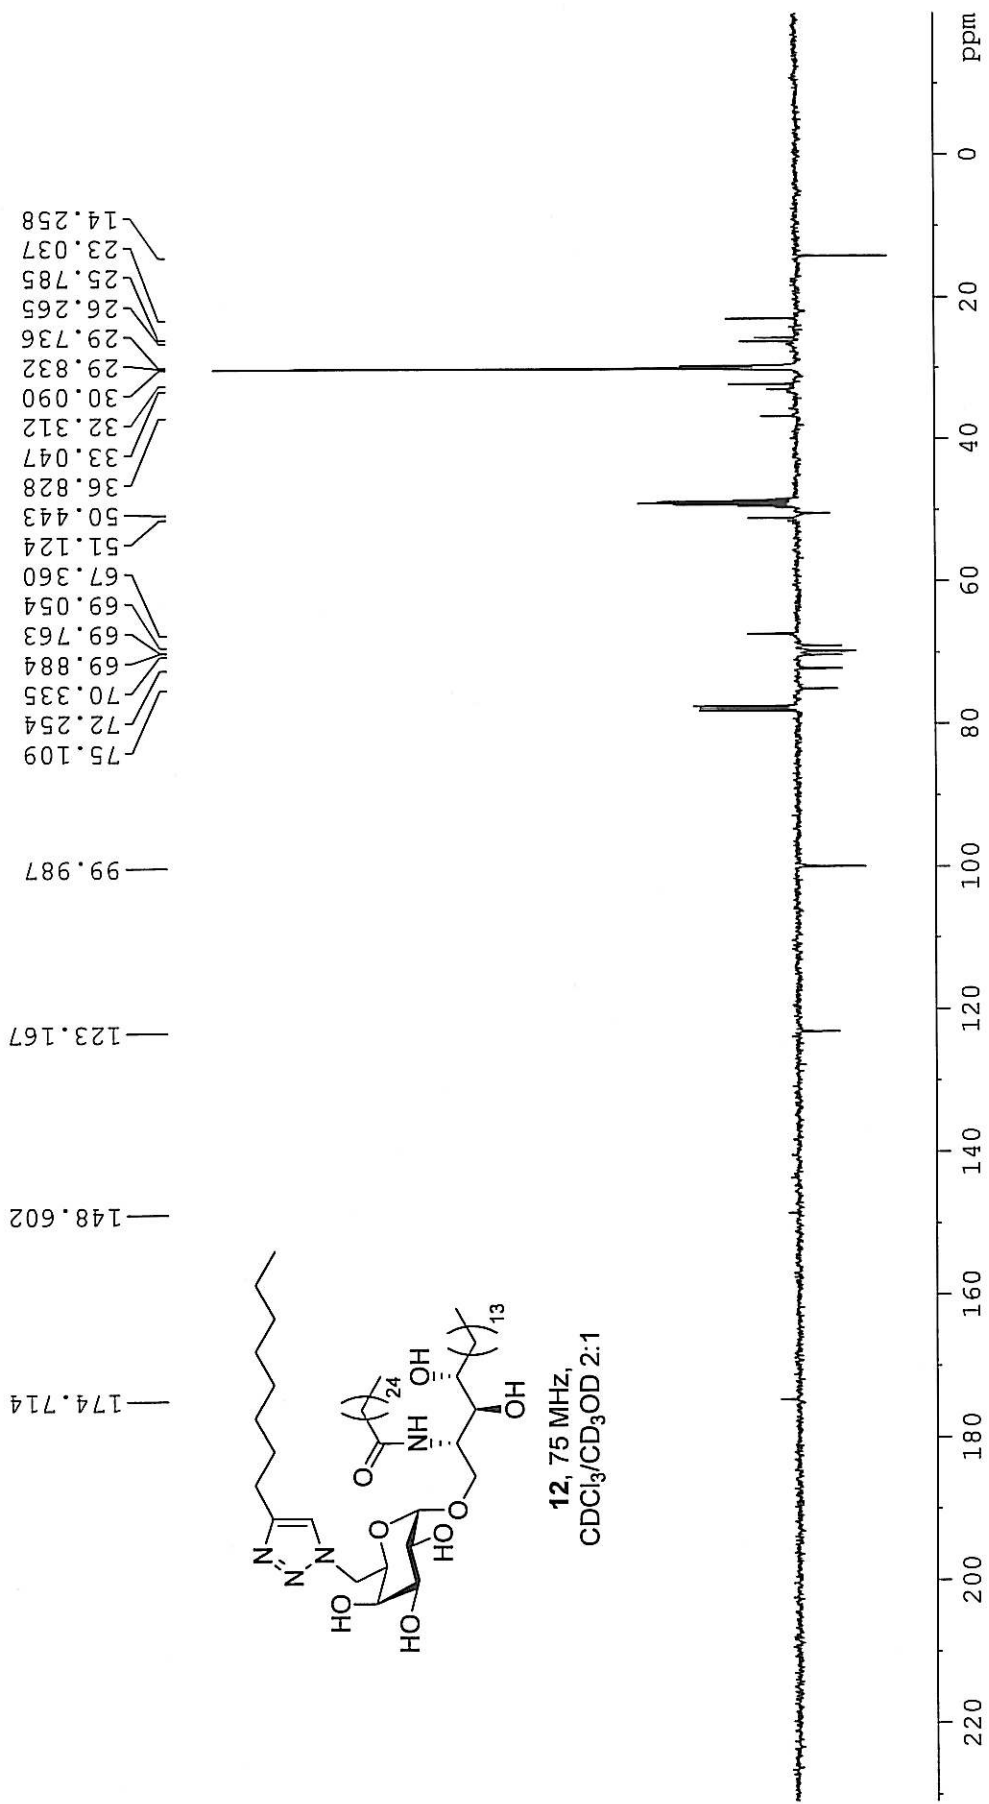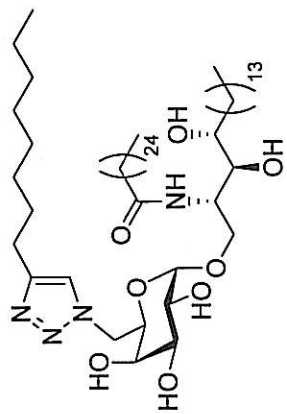

12, 75 MHz,  
CDCl<sub>3</sub>/CD<sub>3</sub>OD 2:1

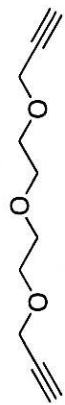

16b, 300 MHz,  
CDCl<sub>3</sub>

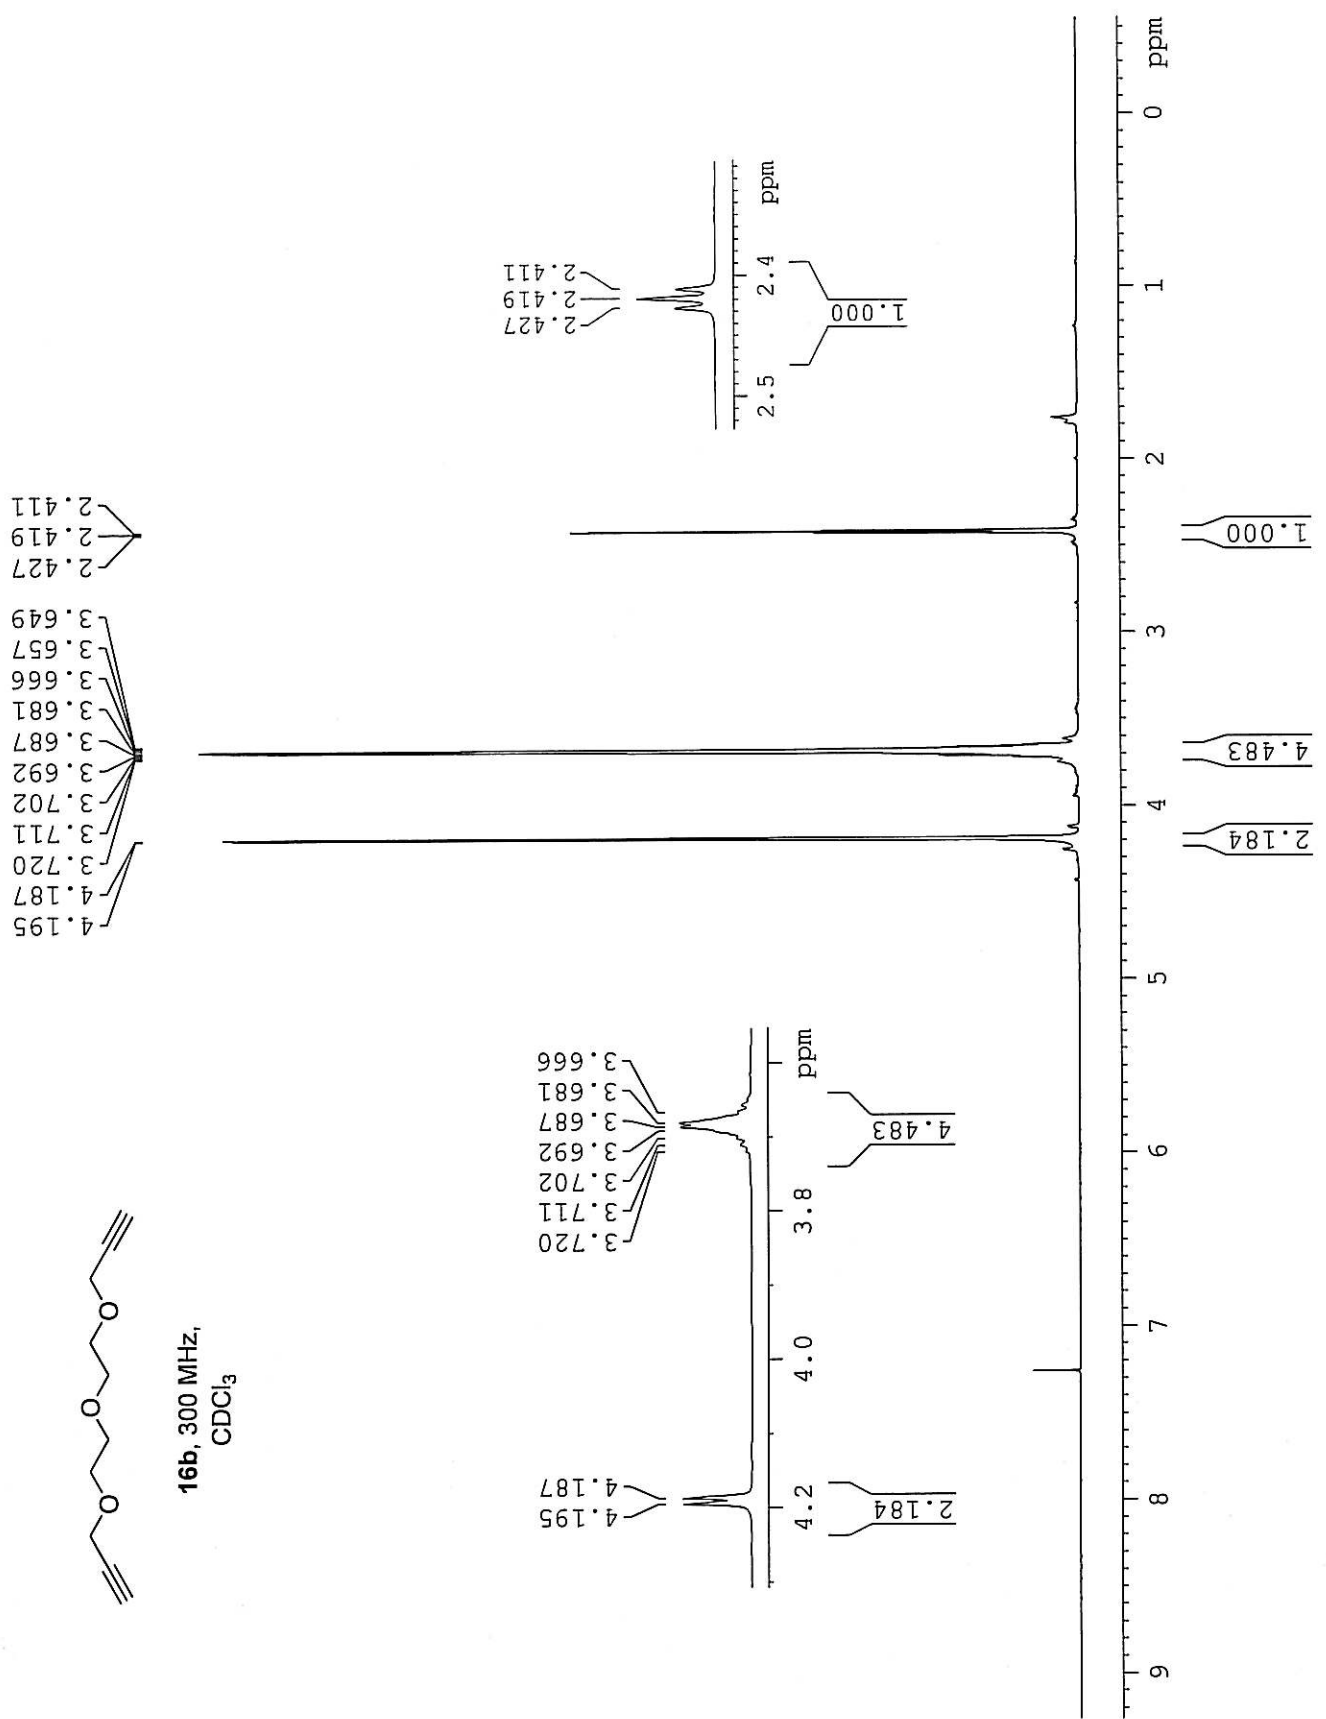

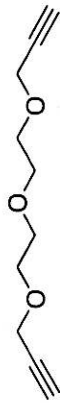

16b, 75 MHz,  
CDCl<sub>3</sub>

79.436  
74.397  
70.163  
68.844  
58.137

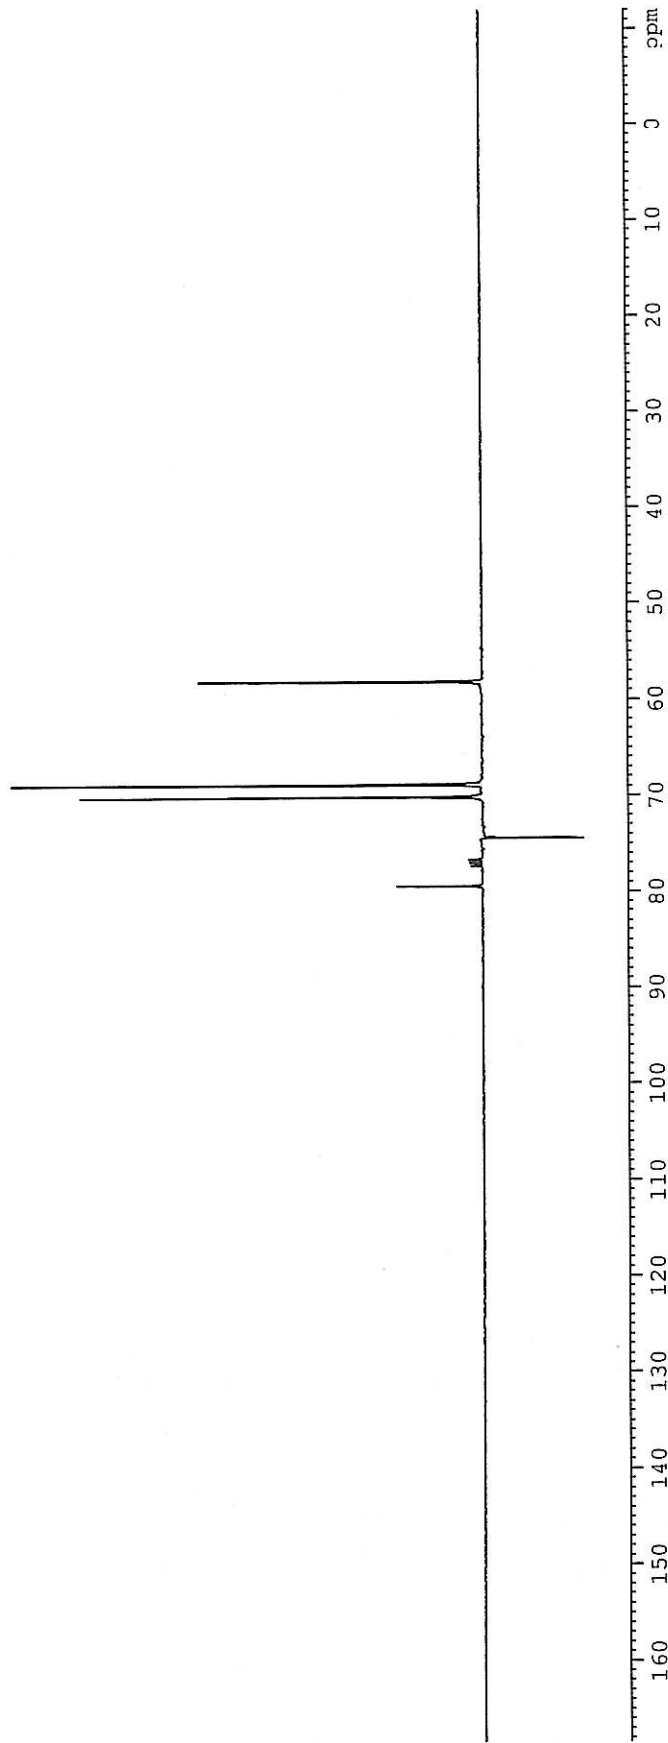

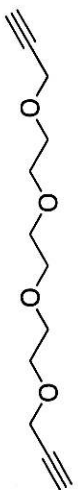

16c, 300 MHz,  
CDCl<sub>3</sub>

4.211  
4.203  
3.718  
3.710  
3.700  
3.696  
3.691  
3.676  
3.670  
2.435  
2.427  
2.419

4.211  
4.203  
3.718  
3.710  
3.700  
3.696  
3.691  
3.676  
3.670

2.435  
2.427  
2.419

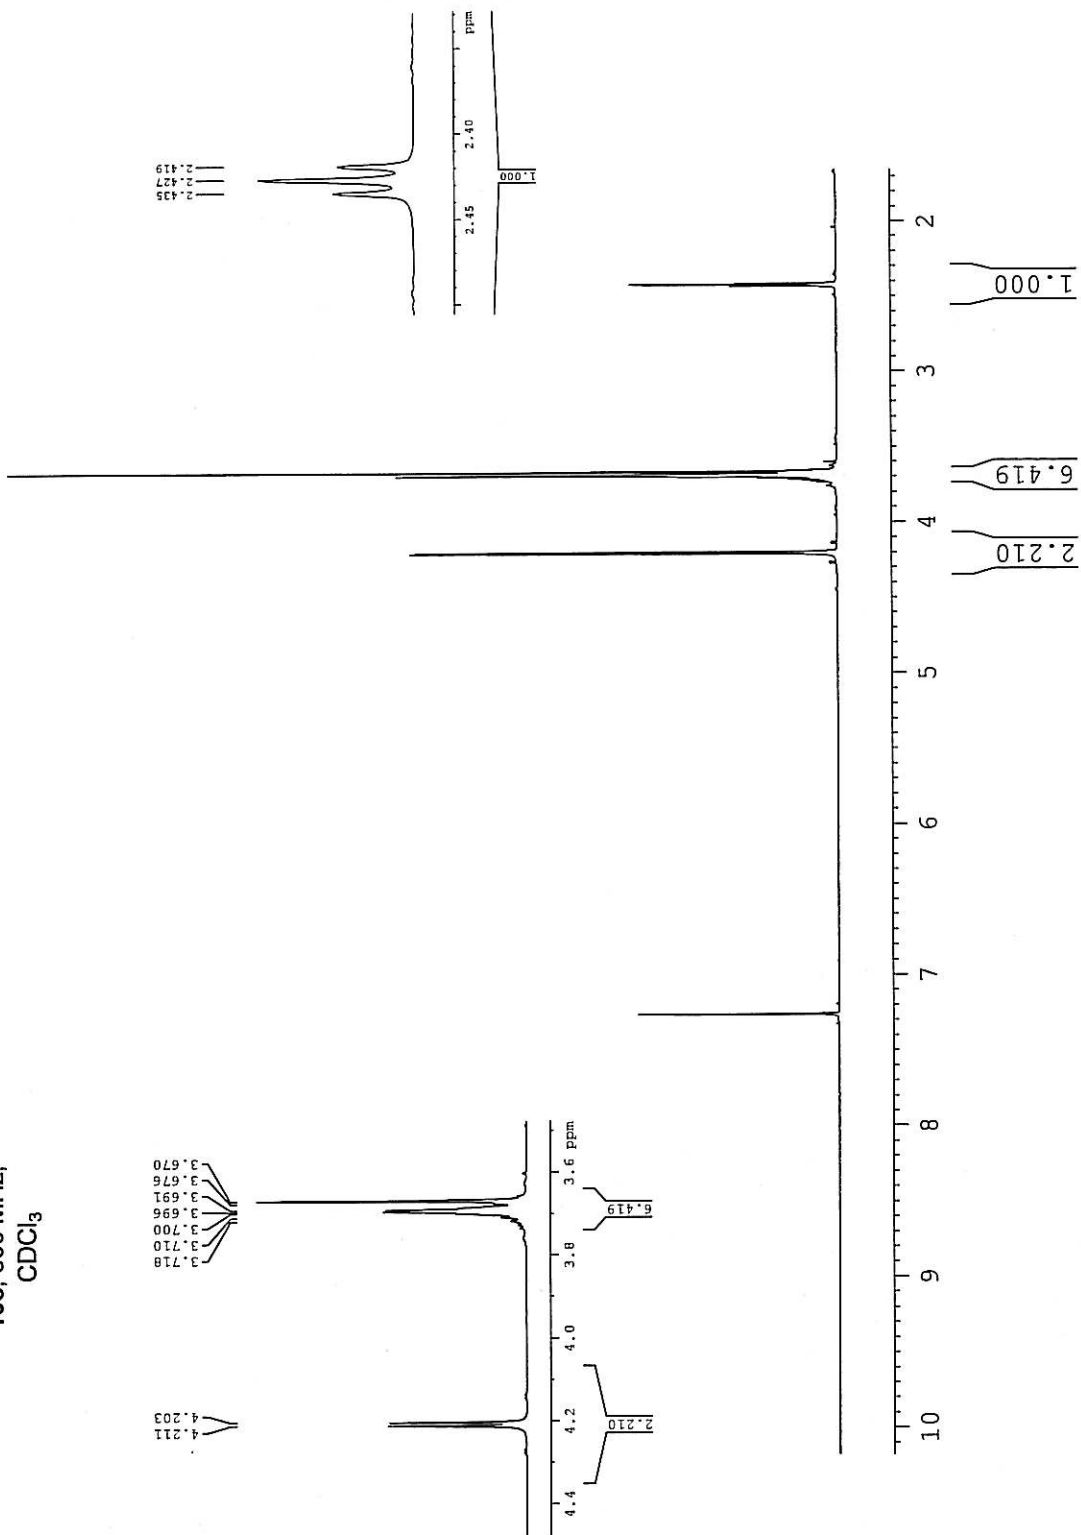



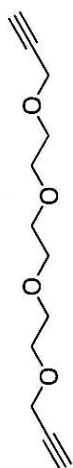

16c, 75 MHz,  
CDCl<sub>3</sub>

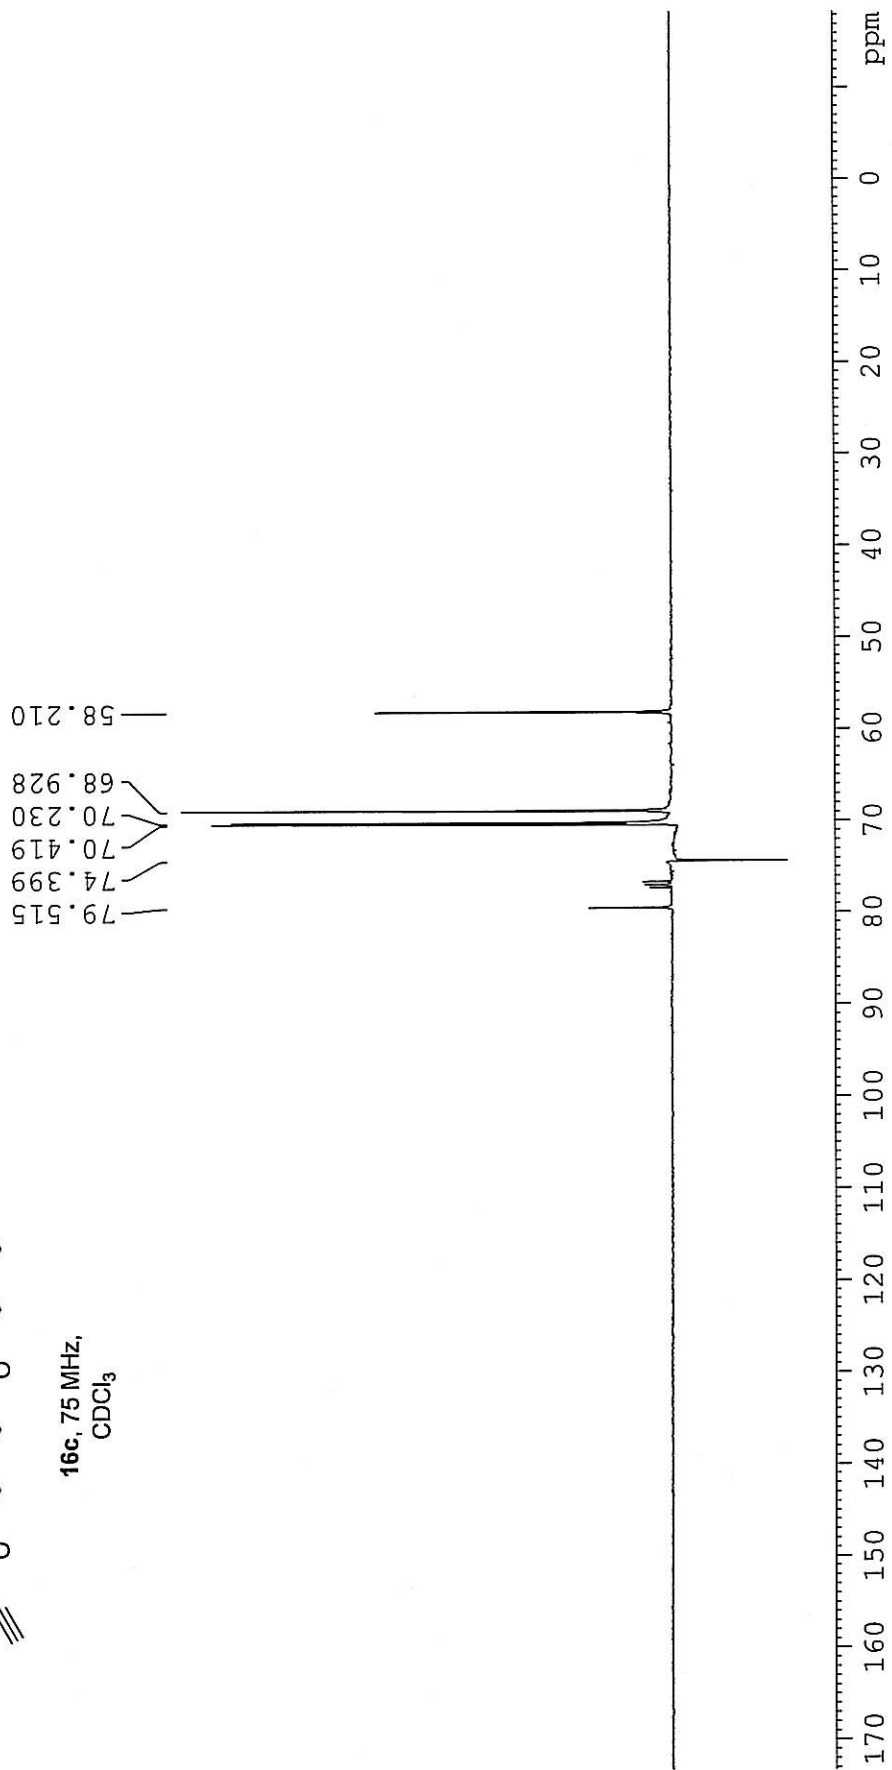

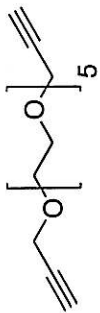

**16d**, 300 MHz,  
CDCl<sub>3</sub>

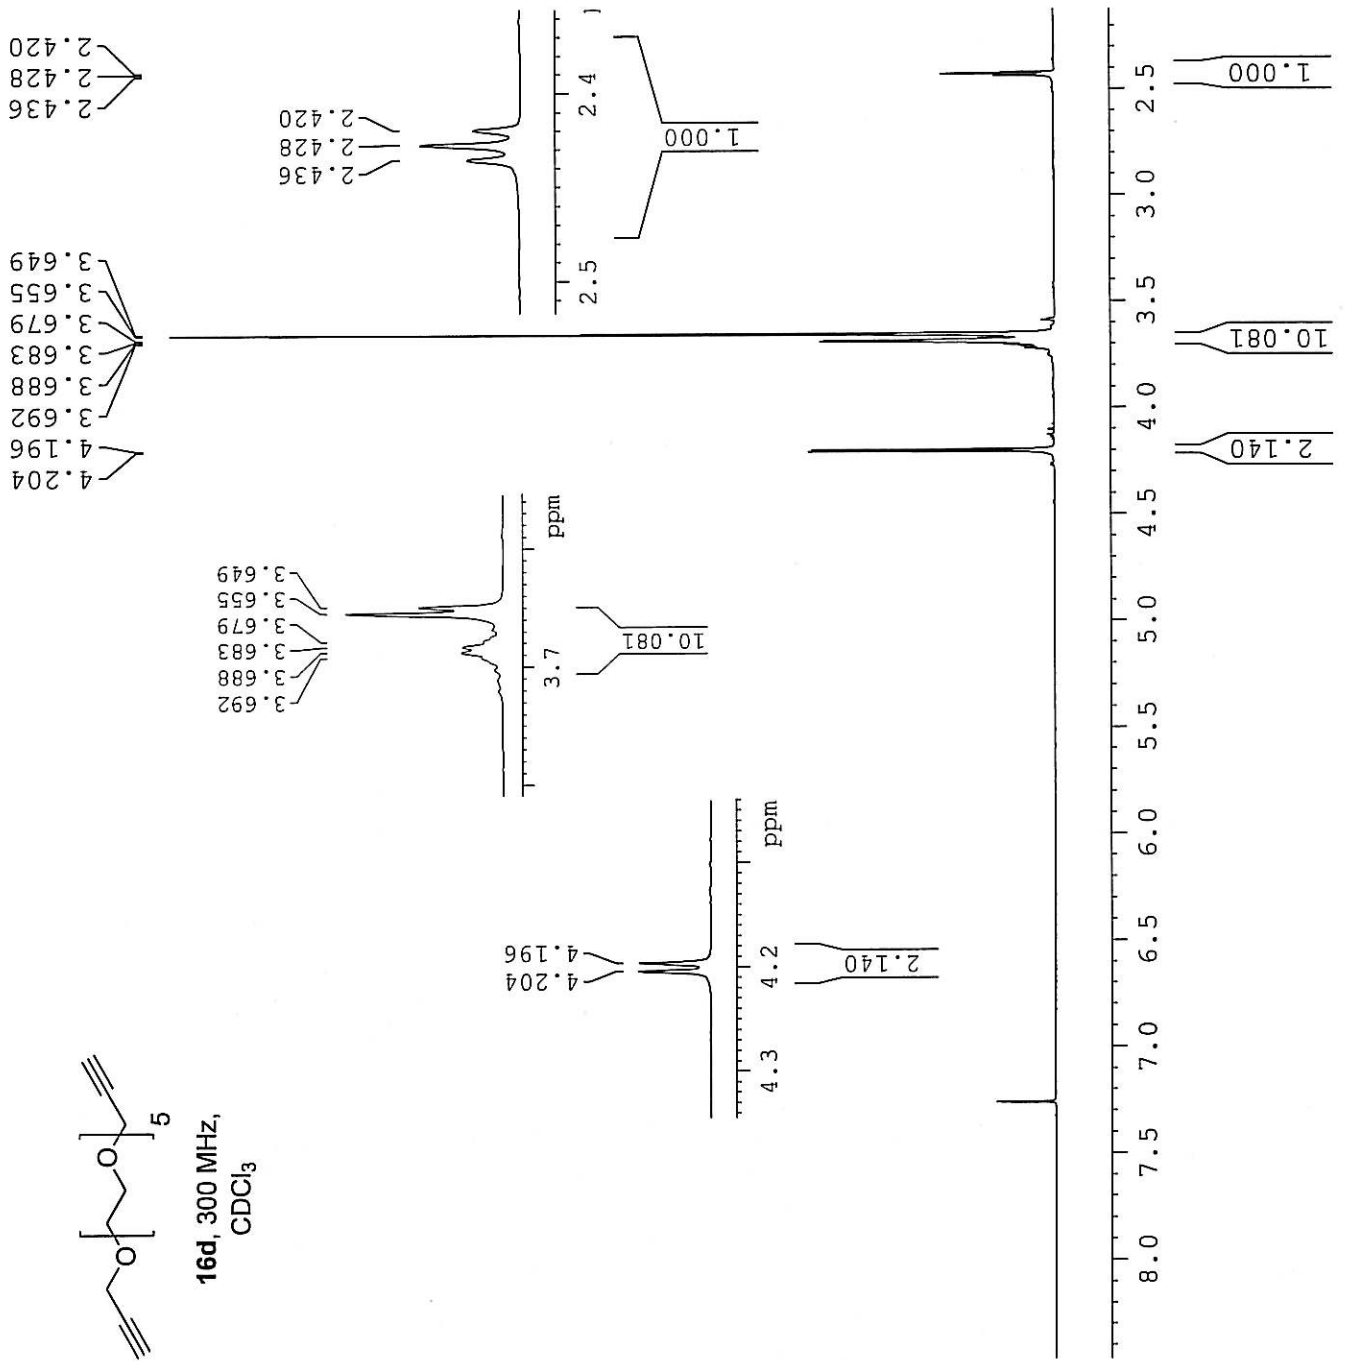

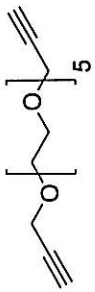

16d, 75 MHz,  
CDCl<sub>3</sub>

79.621  
74.459  
70.534  
70.348  
69.063  
58.341

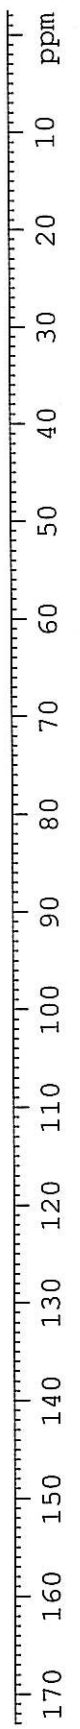



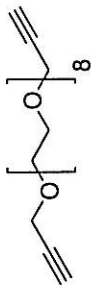

**16e**, 300 MHz,  
CDCl<sub>3</sub>

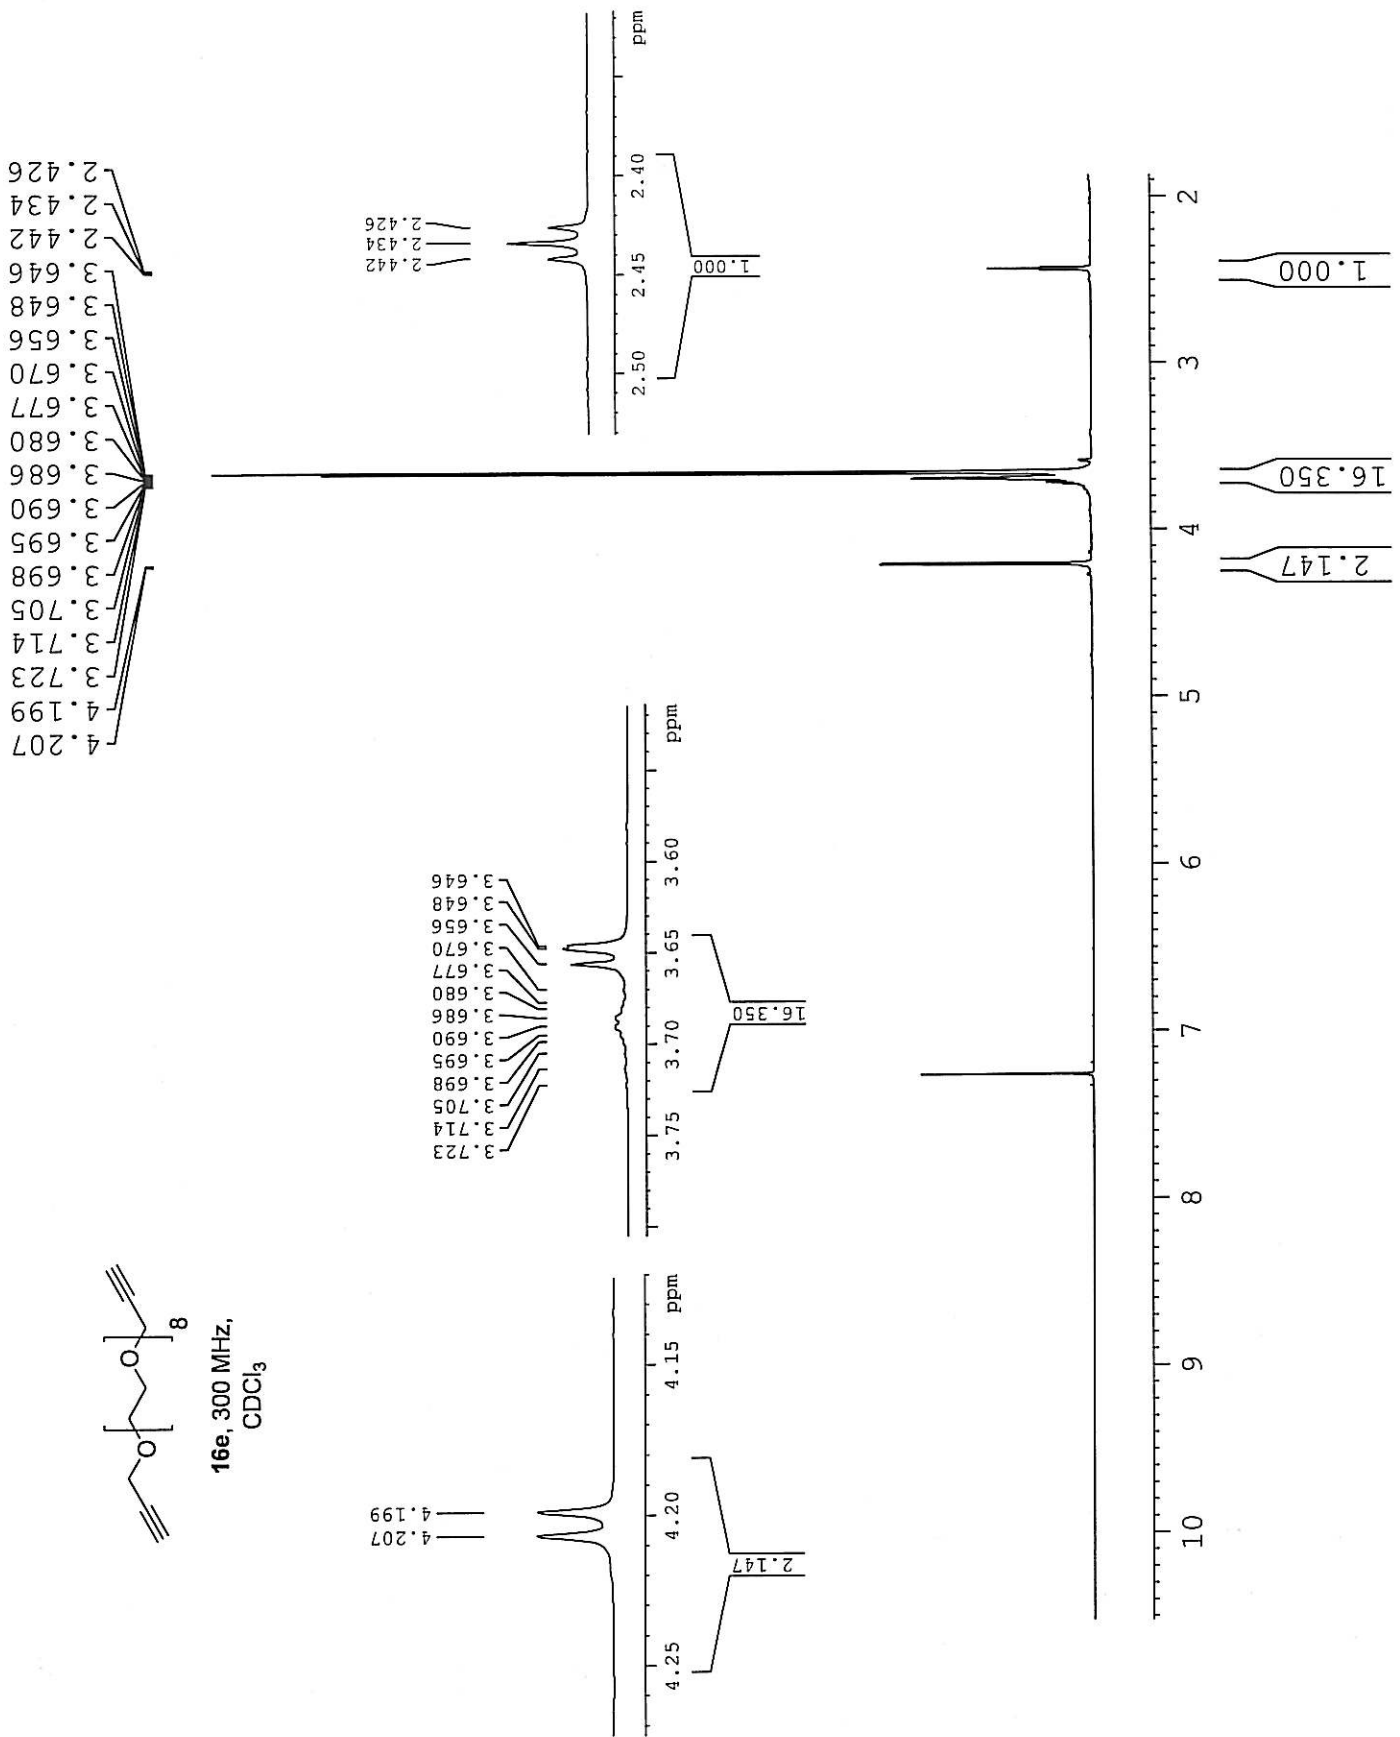

1.263  
1.329  
1.352  
1.370  
1.376  
1.398  
1.468  
1.491  
1.515  
1.541  
1.560  
1.563  
1.563  
1.921  
1.930  
1.939  
2.143  
2.152  
2.167  
2.176  
2.190  
2.199

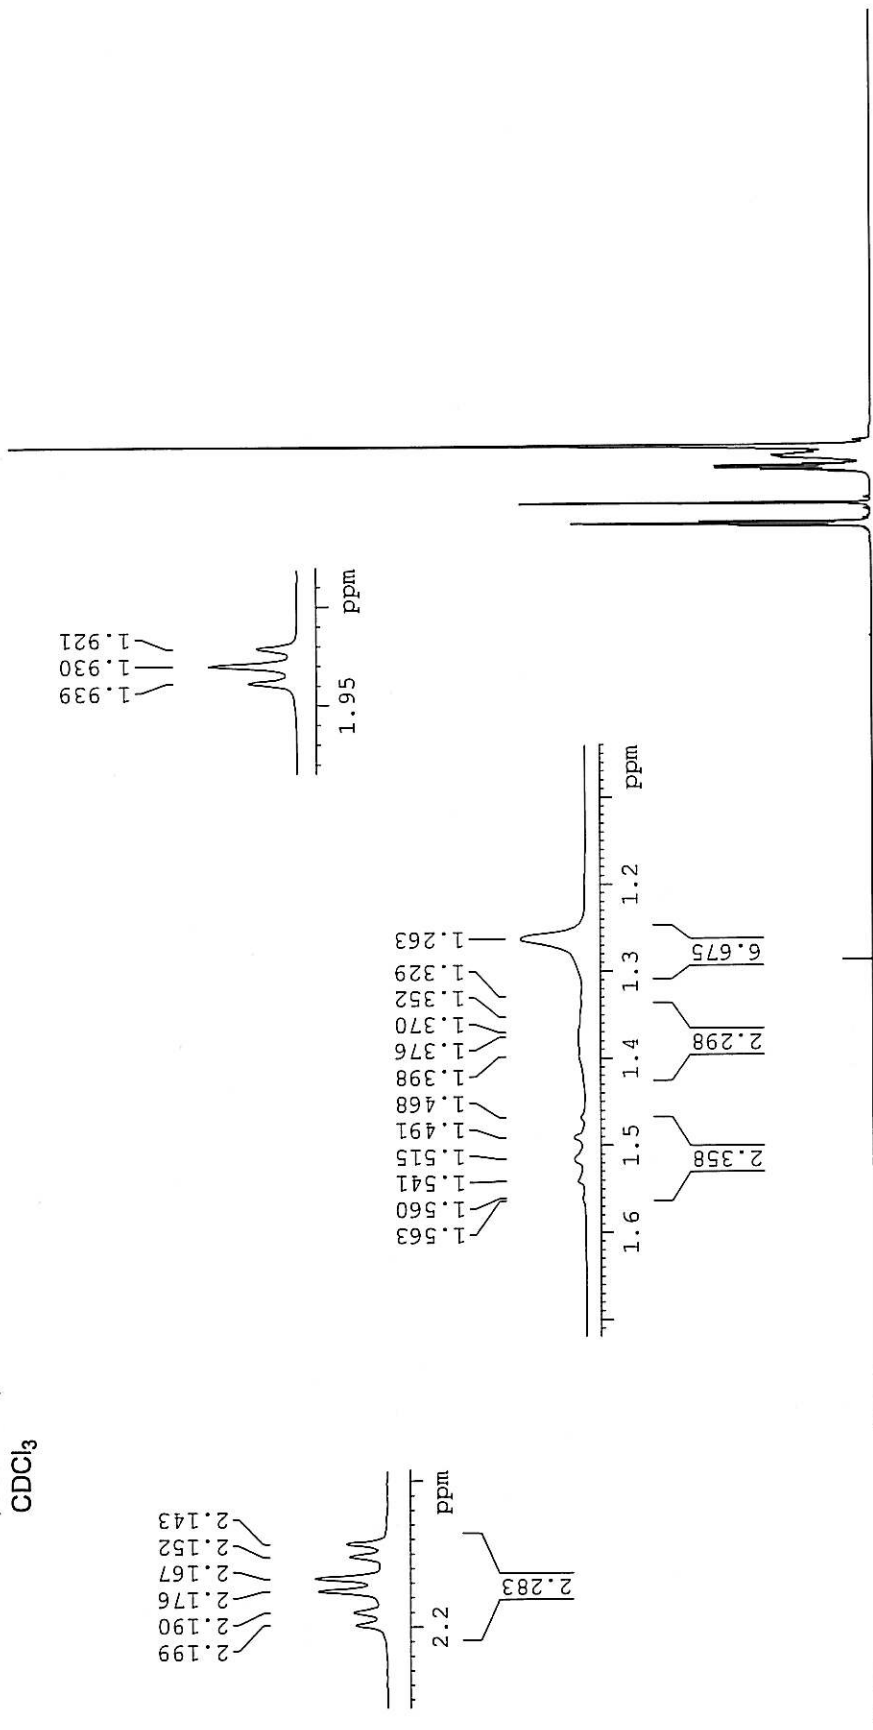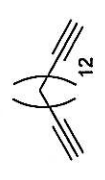

18b, 300 MHz,  
CDCl<sub>3</sub>

ppm

15 14 13 12 11 10 9 8 7 6 5 4 3 2 1 0 -1 -2

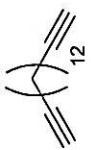

18b, 75 MHz,  
CDCl<sub>3</sub>

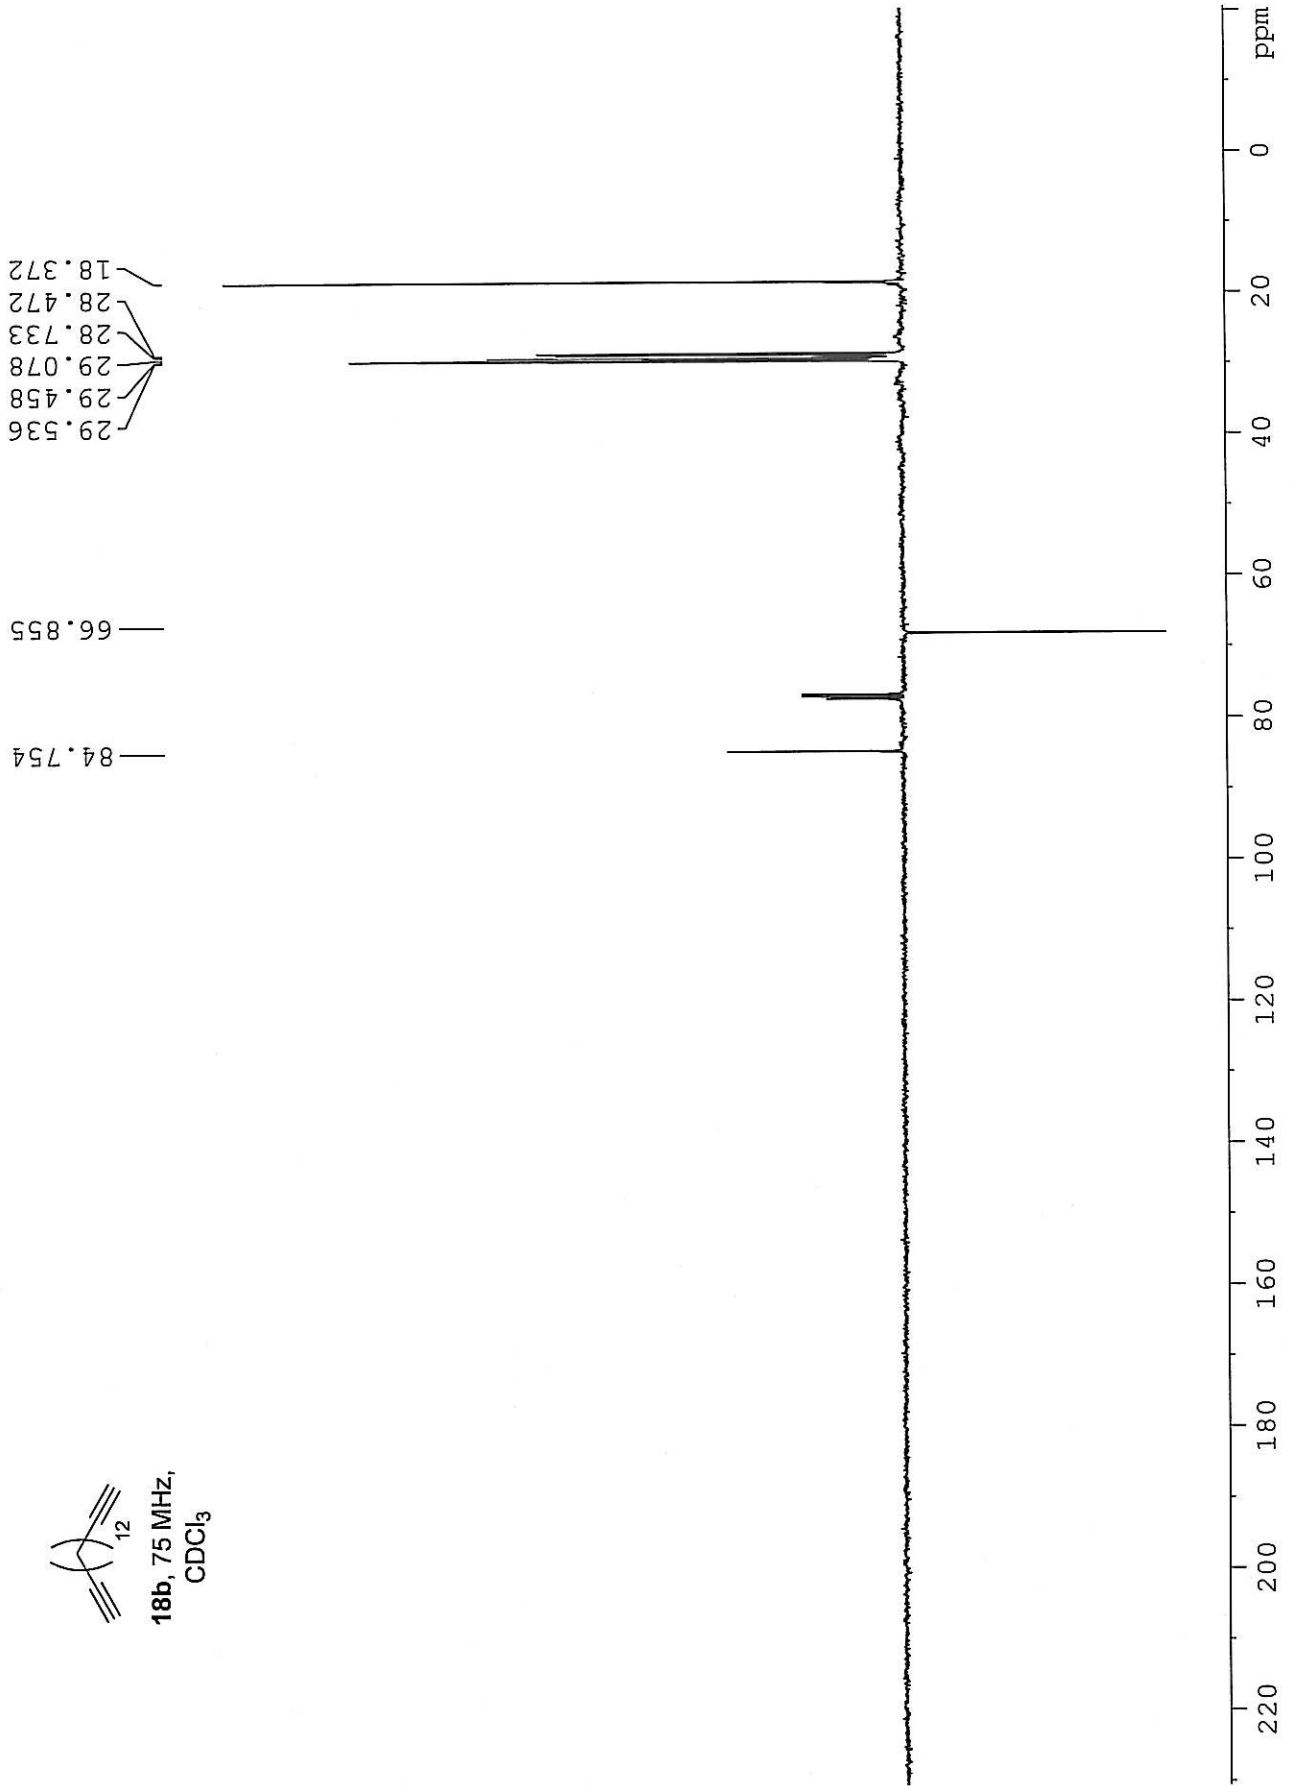

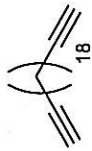

18c, 300 MHz,  
CDCl<sub>3</sub>

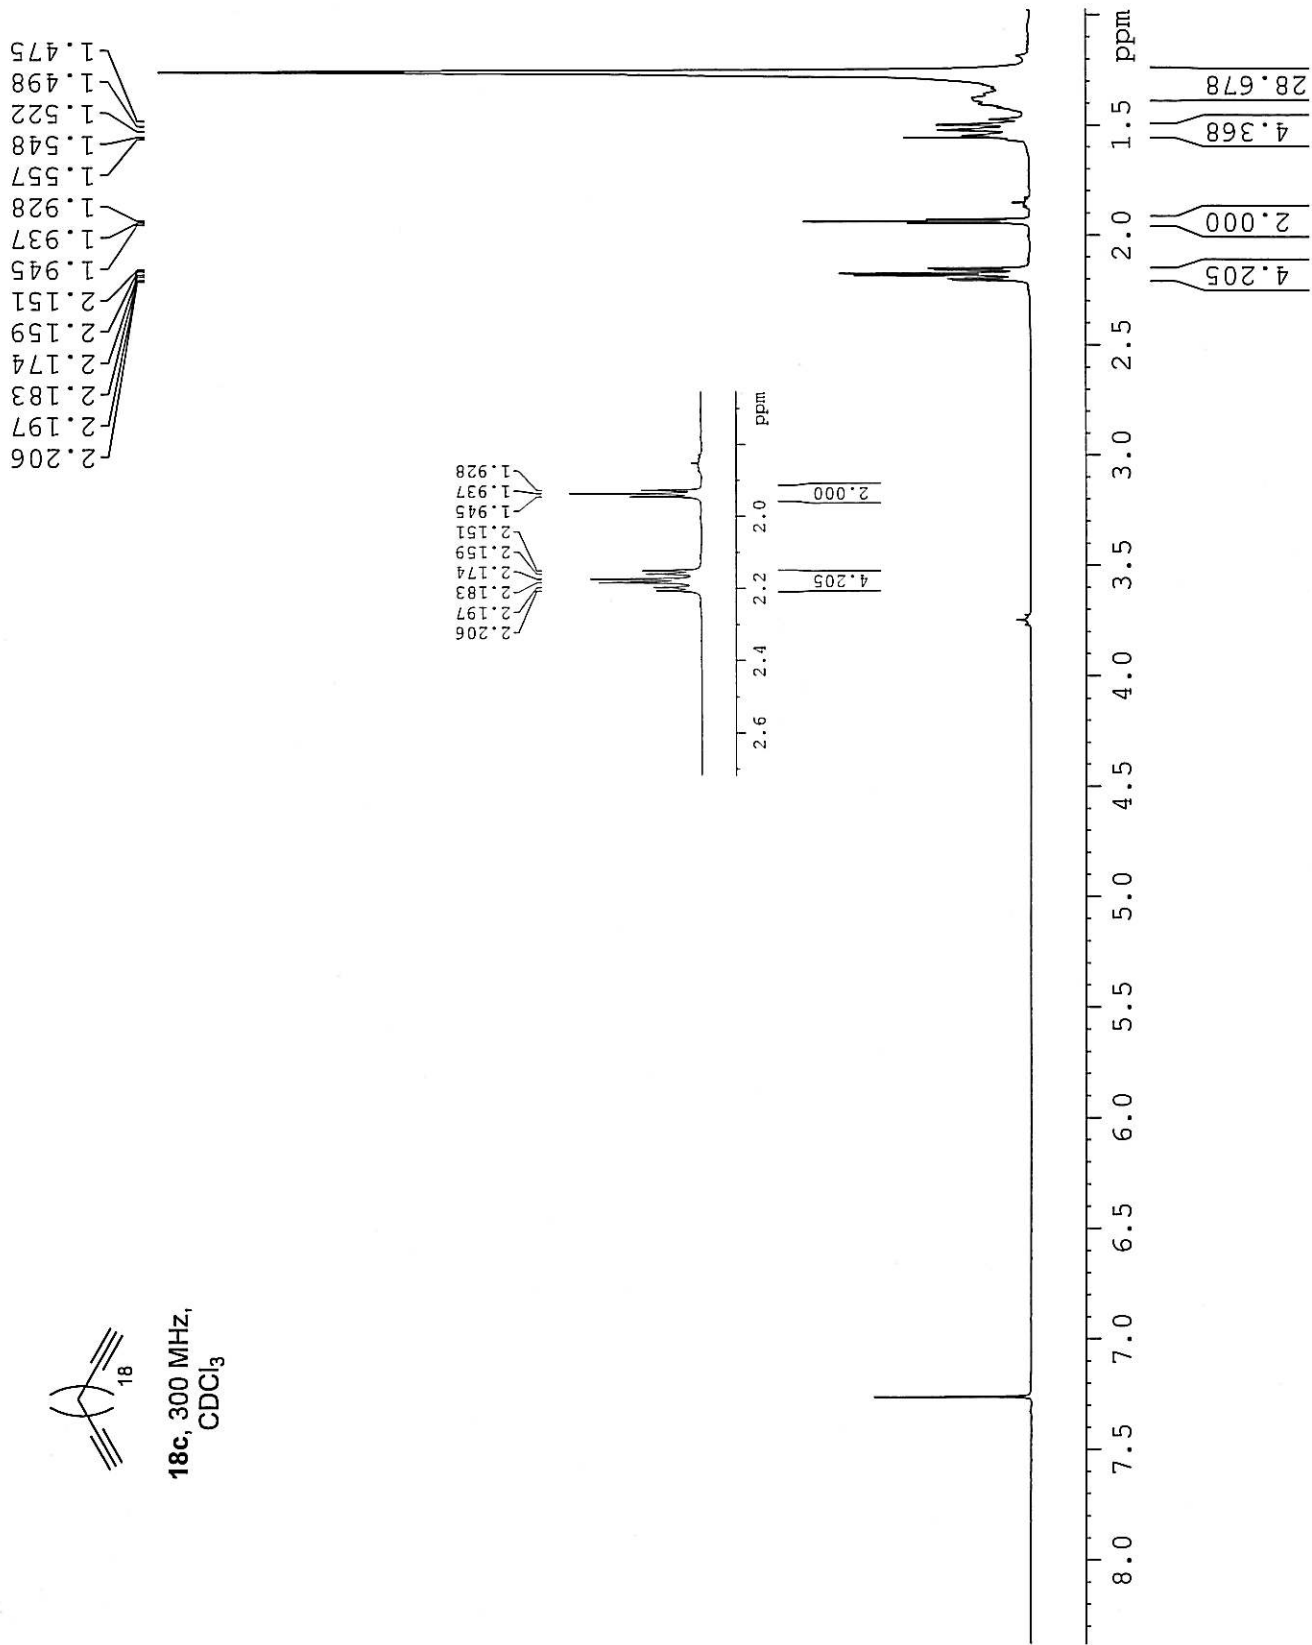



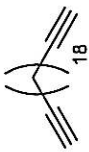

18c, 75 MHz,  
CDCl<sub>3</sub>

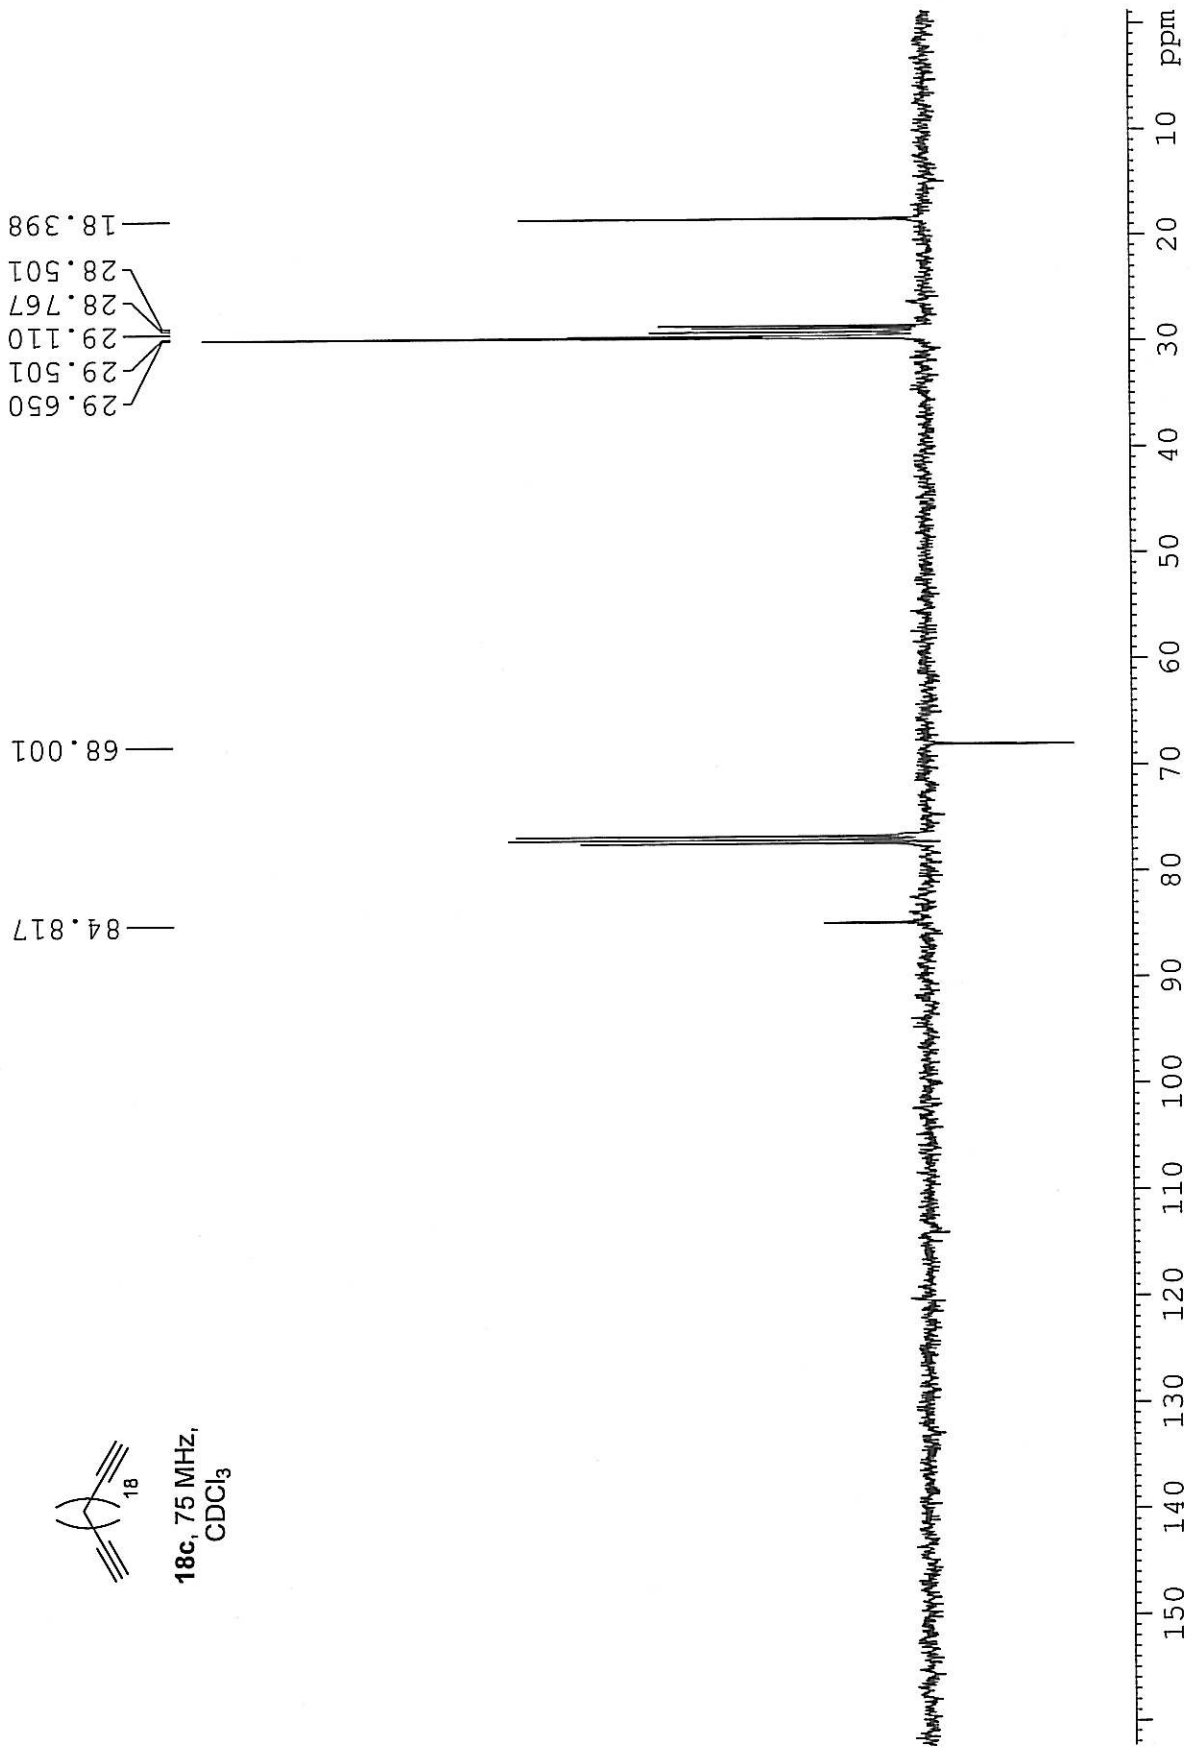

0.828  
 0.851  
 0.872  
 1.166  
 1.232  
 1.299  
 1.559  
 2.117  
 2.140  
 2.162  
 3.365  
 3.371  
 3.376  
 3.382  
 3.387  
 3.478  
 3.683  
 3.694  
 3.717  
 3.727  
 3.765  
 3.777  
 3.799  
 3.810  
 4.100  
 4.146  
 4.166  
 4.185  
 4.564  
 4.589  
 4.849  
 4.861

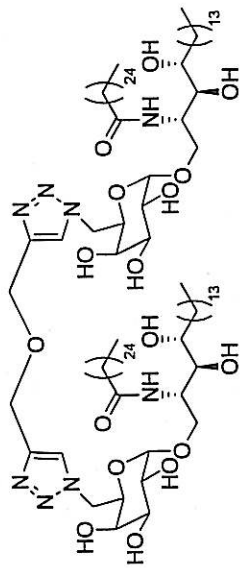

**13a, 300 MHz,**  
**CDCl<sub>3</sub> / CD<sub>3</sub>OD 2:1**

3.810  
 3.799  
 3.777  
 3.765  
 3.727  
 3.717  
 3.694  
 3.683

4.861  
 4.849

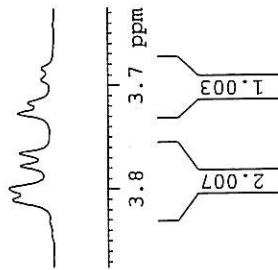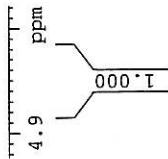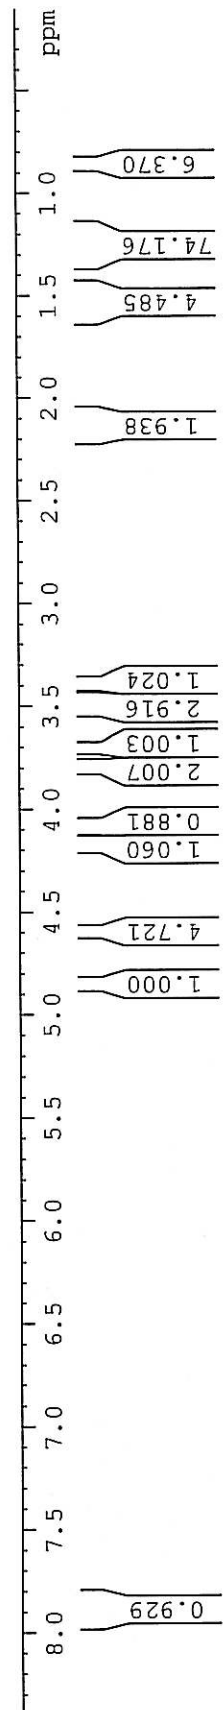

13.231  
 22.077  
 25.352  
 28.792  
 28.854  
 28.918  
 29.101  
 29.161  
 31.364  
 31.856  
 35.859  
 49.586  
 50.510  
 62.636  
 66.633  
 68.132  
 68.937  
 69.396  
 71.401  
 73.984  
 99.091  
 124.529  
 144.859  
 173.970

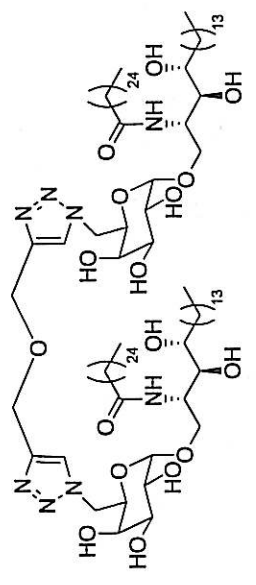

13a, 75 MHz,  
 CDCl<sub>3</sub> / CD<sub>3</sub>OD 2:1

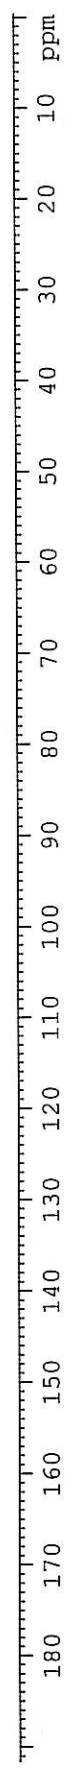

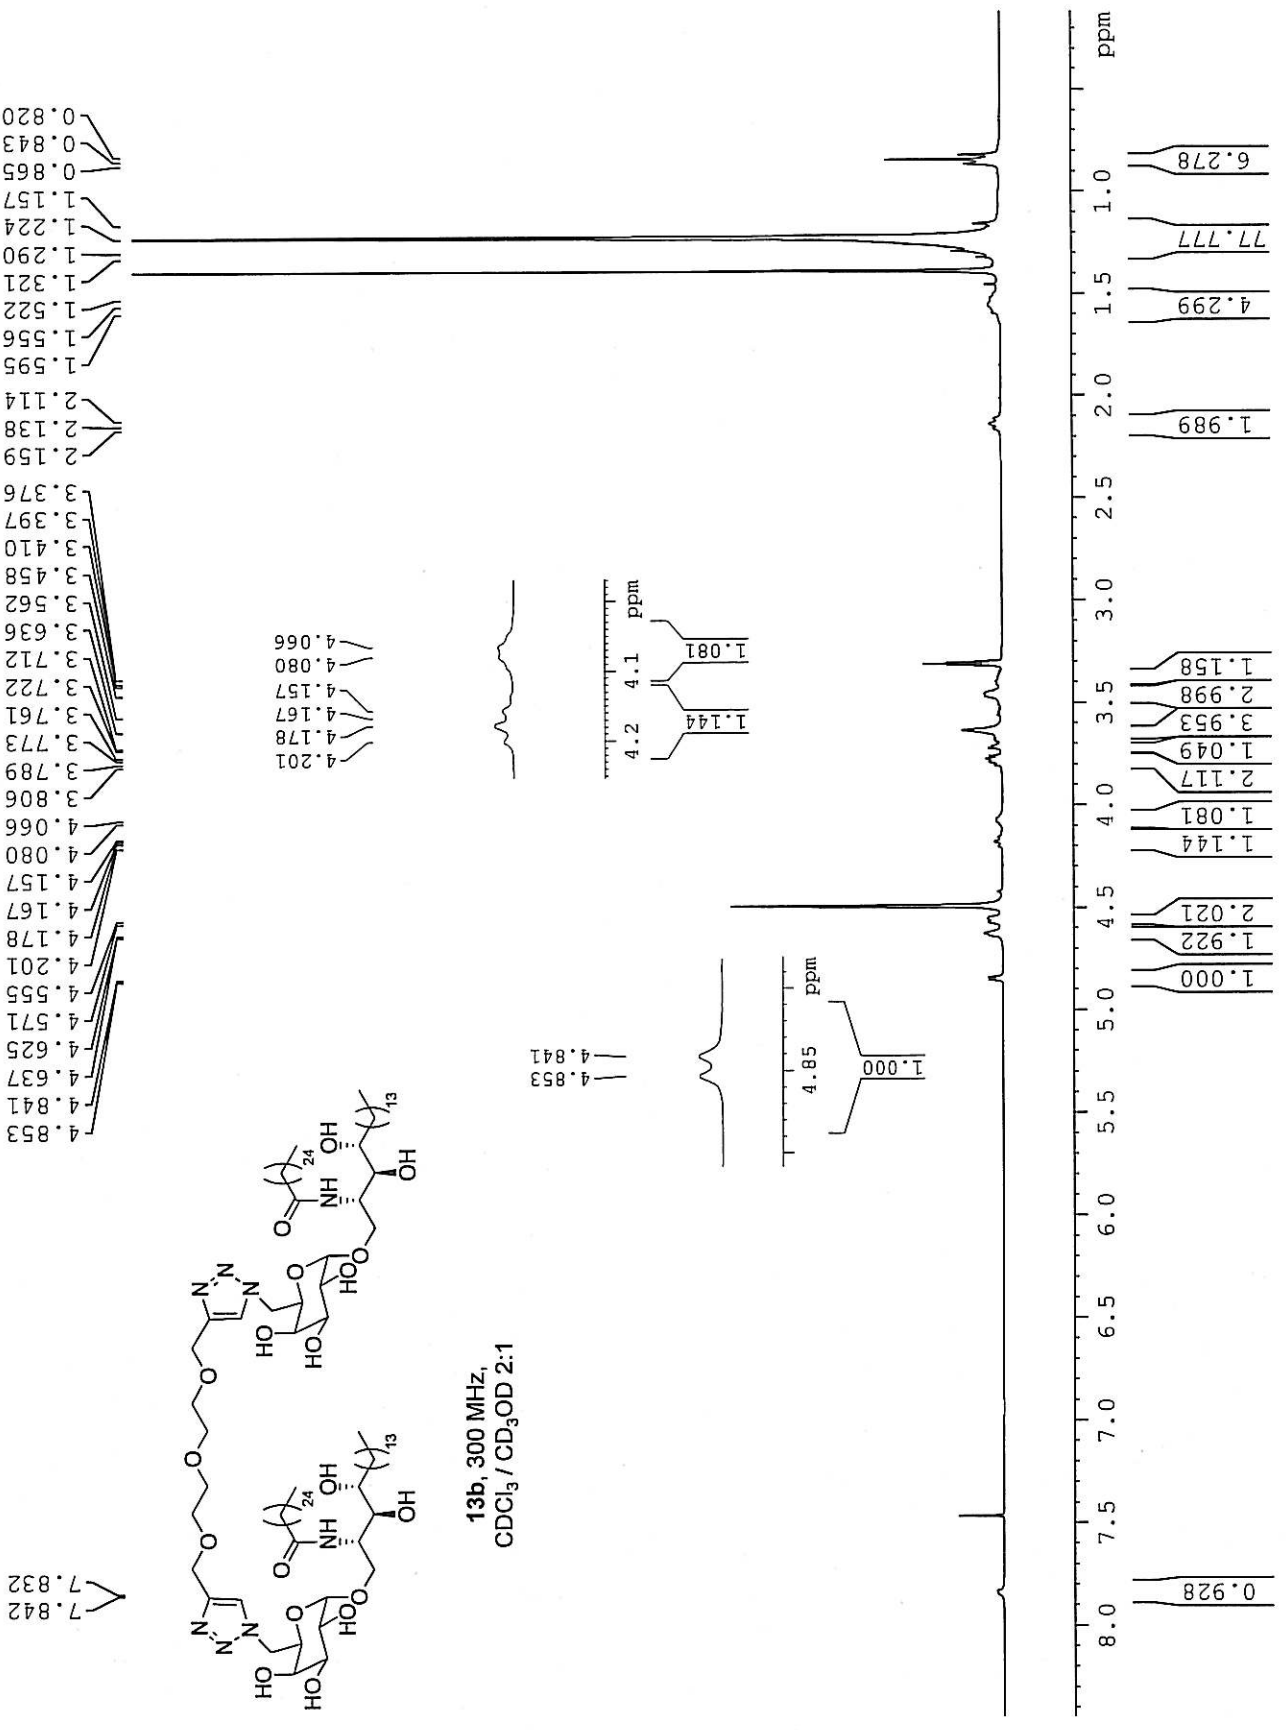

13.489  
 20.558  
 22.246  
 25.468  
 28.942  
 29.018  
 29.057  
 29.194  
 29.269  
 29.314  
 29.445  
 29.770  
 31.519  
 32.166  
 33.843  
 36.072  
 49.735  
 50.460  
 63.783  
 66.875  
 68.277  
 68.899  
 68.999  
 69.205  
 69.514  
 69.978  
 71.608  
 74.195  
 99.218

124.405  
 144.772  
 174.013

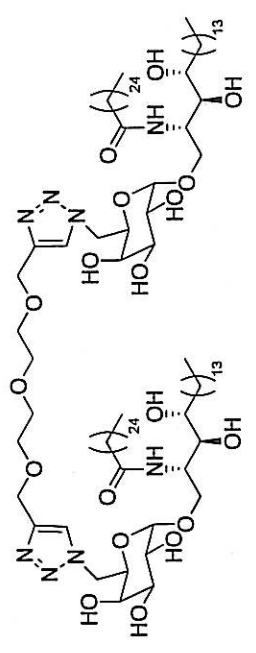

**13b**, 75 MHz,  
 CDCl<sub>3</sub> / CD<sub>3</sub>OD 2:1

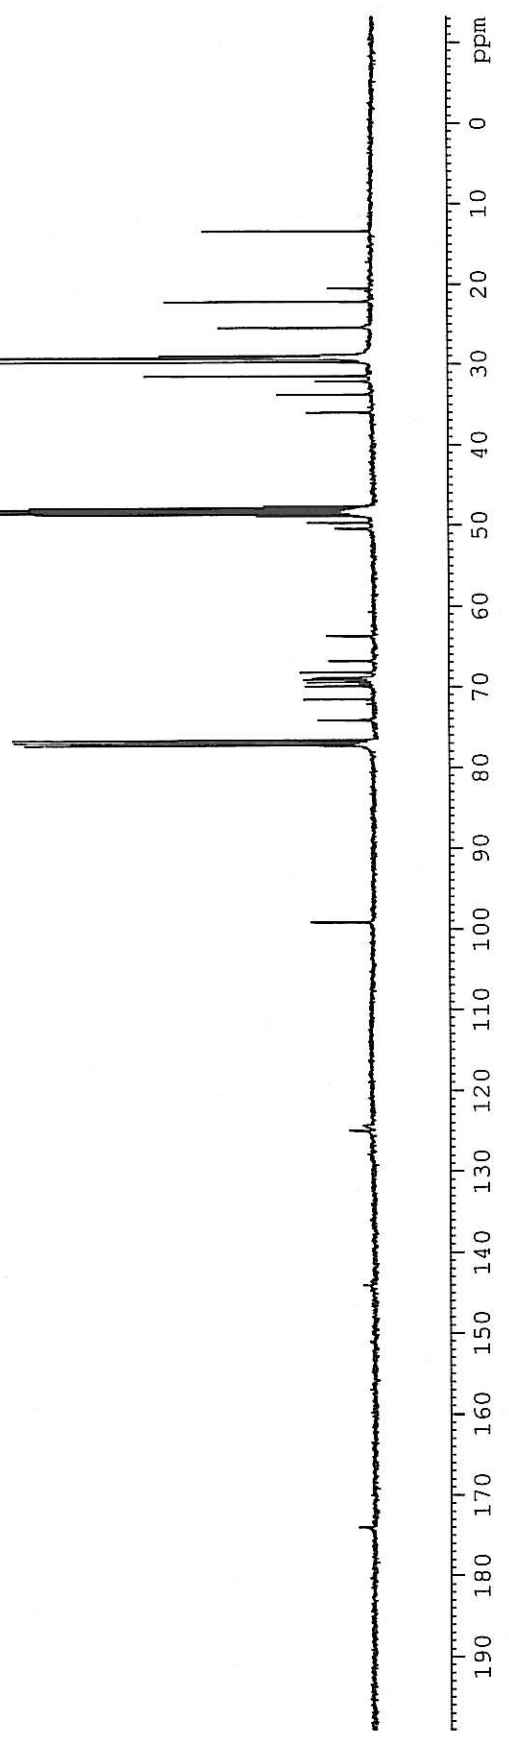

0.831  
 0.864  
 0.848  
 1.230  
 1.588  
 1.617  
 2.123  
 2.141  
 2.159  
 3.387  
 3.403  
 3.413  
 3.469  
 3.502  
 3.545  
 3.555  
 3.567  
 3.580  
 3.631  
 3.644  
 3.651  
 3.677  
 3.686  
 3.693  
 3.718  
 3.718  
 3.769  
 3.780  
 3.792  
 4.076  
 4.085  
 4.164  
 4.178  
 4.194  
 4.569  
 4.629  
 4.849  
 4.858

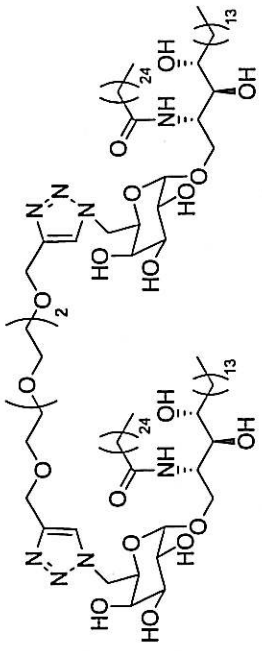

**13c**, 400 MHz,  
 CDCl<sub>3</sub> / CD<sub>3</sub>OD 2:1

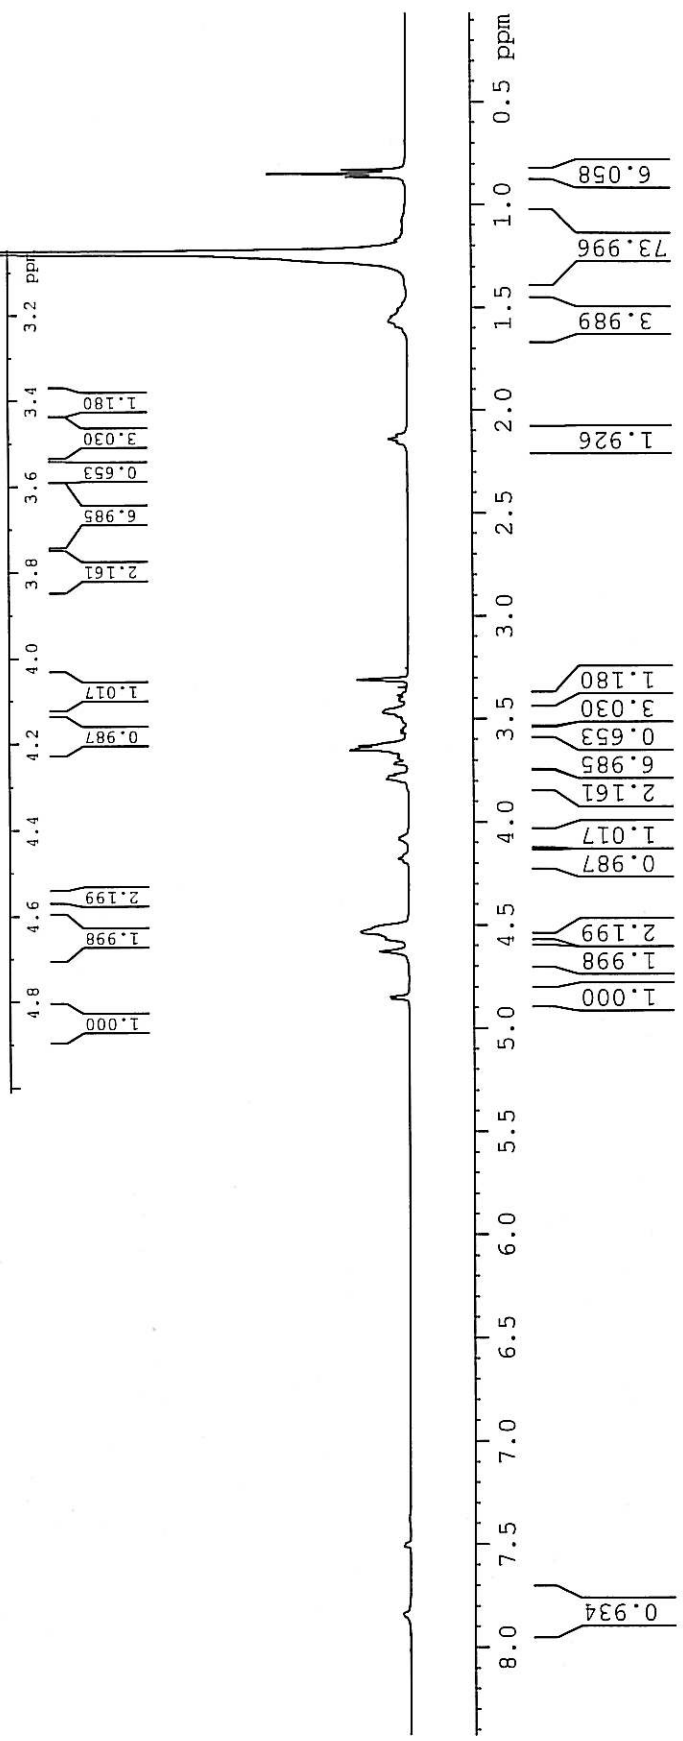

13.292  
 22.114  
 25.364  
 28.723  
 28.818  
 28.886  
 28.934  
 29.135  
 29.184  
 29.313  
 31.397  
 31.934  
 35.906  
 49.649  
 50.407  
 63.645  
 66.645  
 68.163  
 68.879  
 68.961  
 69.072  
 69.408  
 69.831  
 69.884  
 71.426  
 74.003  
 99.139

124.278

144.264

173.946

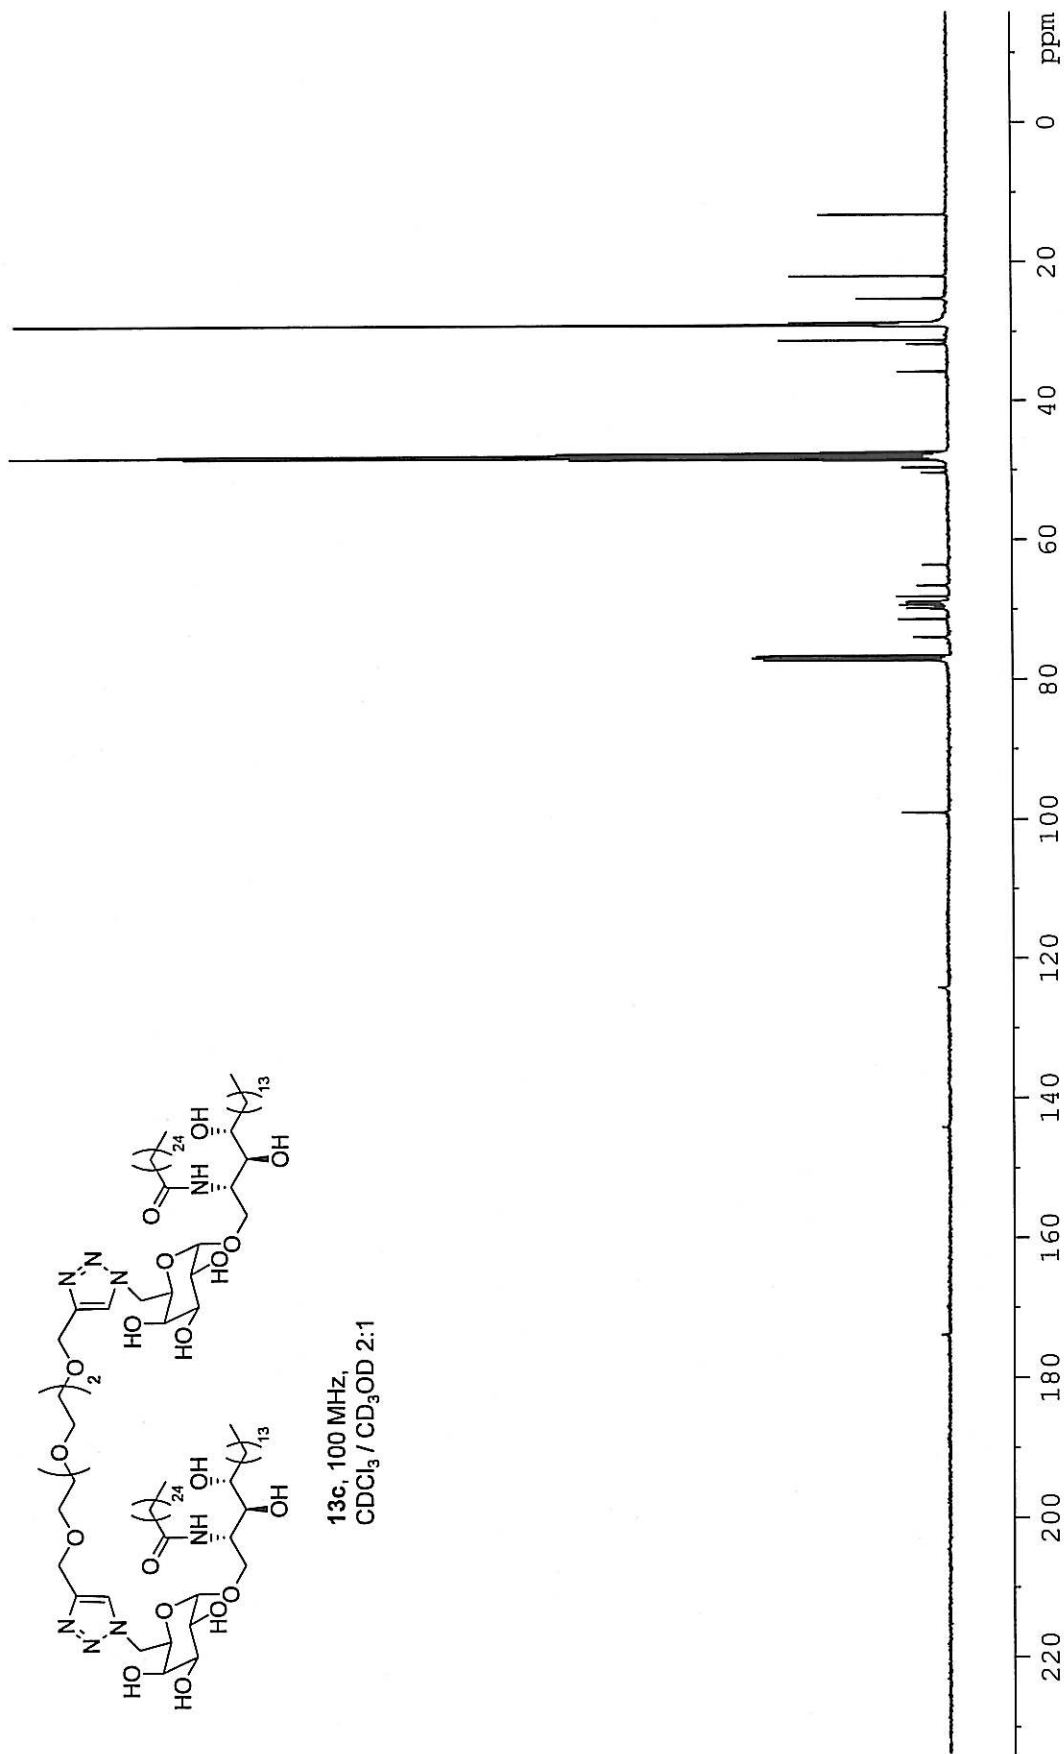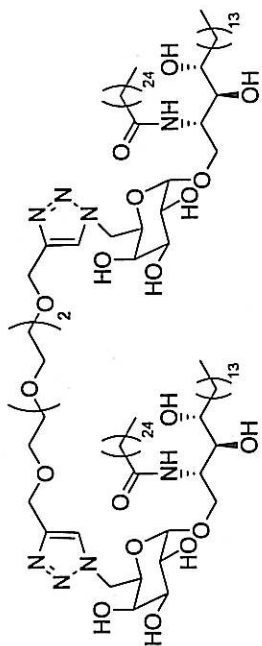

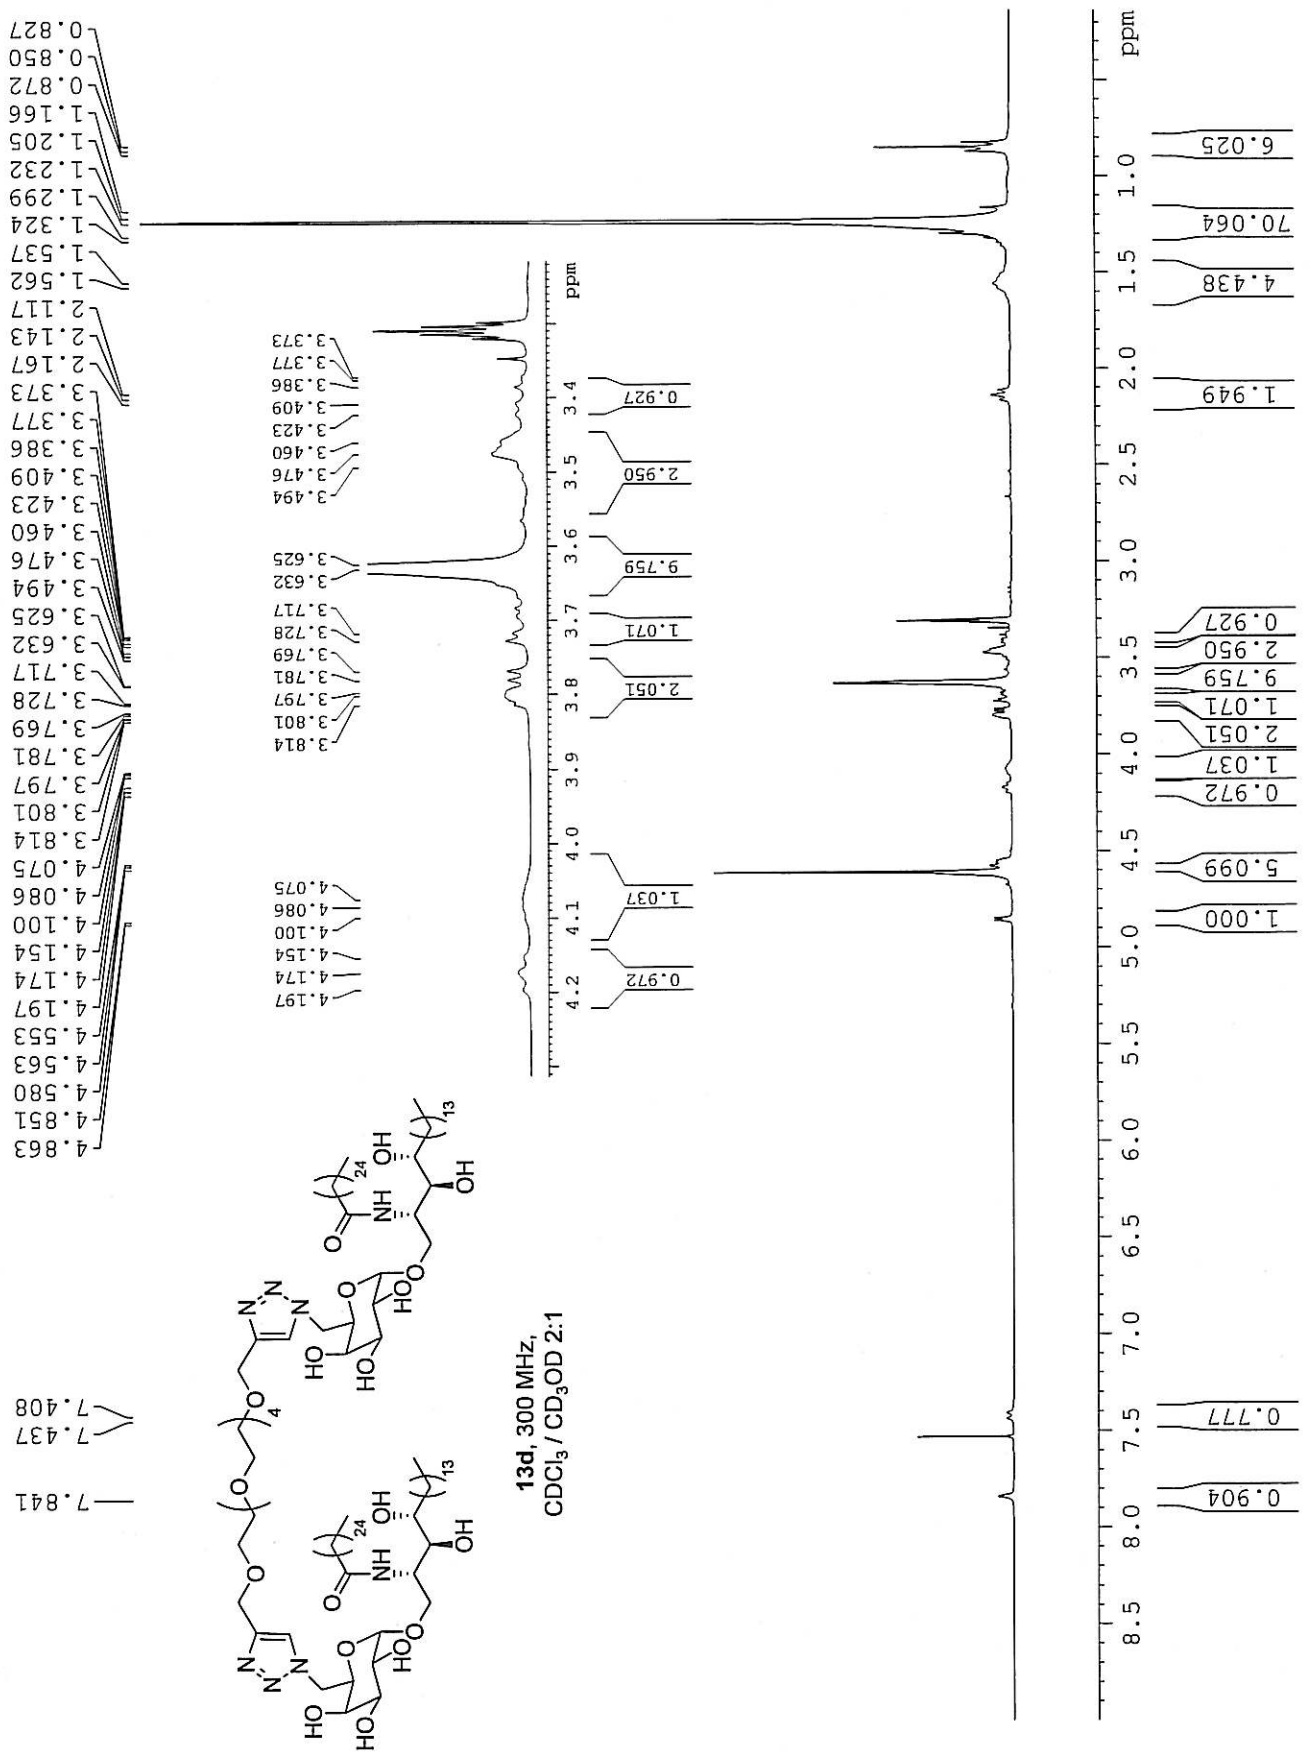





0.825  
 0.848  
 0.865  
 1.160  
 1.229  
 1.291  
 1.553  
 2.163  
 2.139  
 2.115  
 3.428  
 3.471  
 3.559  
 3.628  
 3.689  
 3.730  
 3.769  
 3.779  
 3.804  
 4.054  
 4.146  
 4.166  
 4.187  
 4.554  
 4.581  
 4.624  
 4.849  
 4.857

7.831  
 7.524  
 7.497

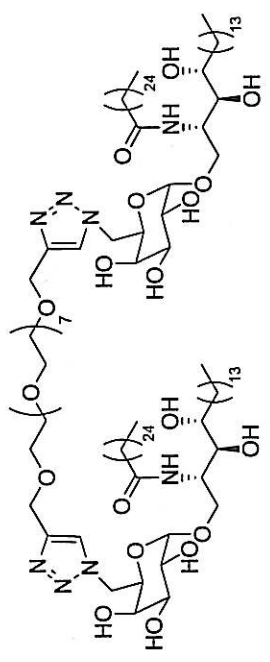

**13e, 300 MHz,**  
**CDCl<sub>3</sub> / CD<sub>3</sub>OD 2:1**

4.3 4.2 4.1 4.0 3.9 3.8 3.7 3.6 3.5 3.4 3.3 3.2 ppm

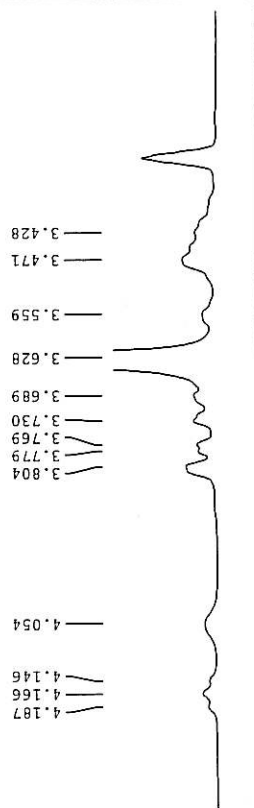

4.194  
0.980  
16.348  
1.345  
2.130  
1.031  
1.057

8.5 8.0 7.5 7.0 6.5 6.0 5.5 5.0 4.5 4.0 3.5 3.0 2.5 2.0 1.5 1.0 ppm

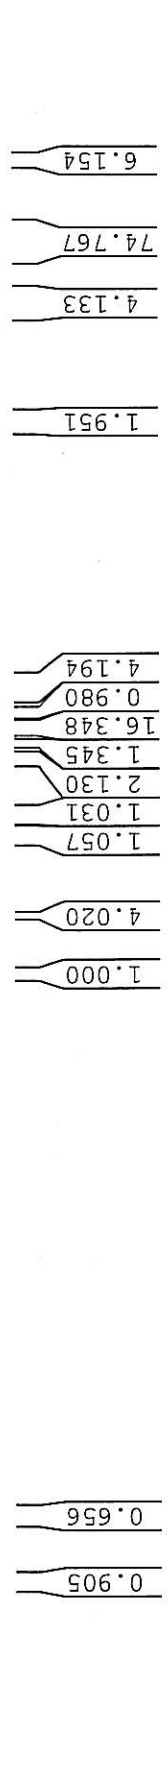

13.293  
 22.114  
 25.355  
 25.377  
 28.817  
 28.885  
 28.936  
 29.064  
 29.134  
 29.184  
 29.314  
 31.397  
 31.883  
 35.913  
 49.662  
 50.471  
 63.577  
 66.643  
 68.173  
 68.932  
 68.971  
 69.397  
 69.616  
 69.709  
 71.435  
 73.928

99.138

124.265

144.847

173.876

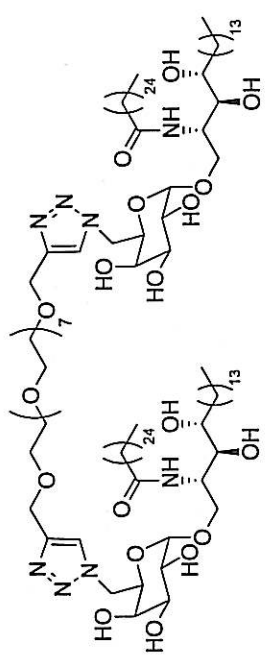

**13e**, 100 MHz,  
 CDCl<sub>3</sub> / CD<sub>3</sub>OD 2:1

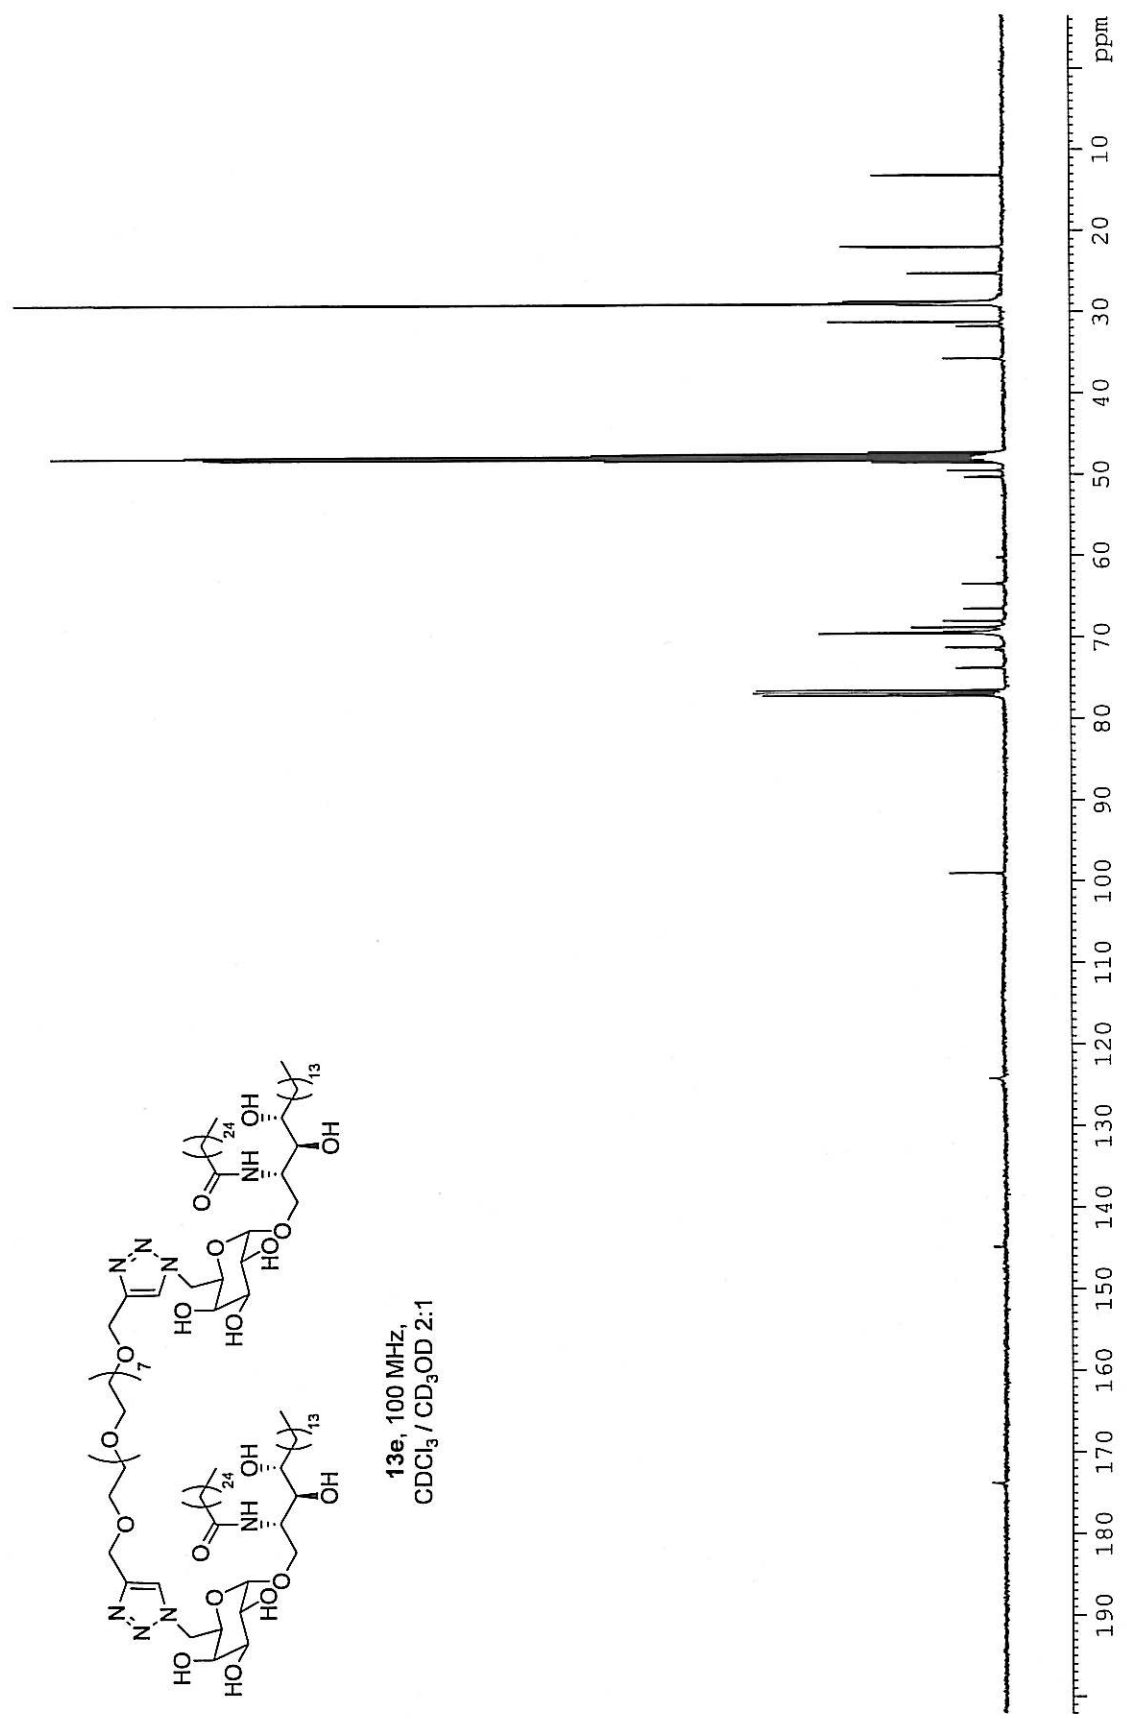

0.820  
0.843  
0.864

2.114  
2.139  
2.164  
2.687  
3.357  
3.371  
3.392  
3.406  
3.463  
3.478  
3.503  
3.519  
3.538  
3.666  
3.677  
3.699  
3.710  
3.739  
3.752  
3.765  
3.785  
3.797  
4.126  
4.148  
4.172  
4.840  
4.852

7.545  
7.420  
7.391

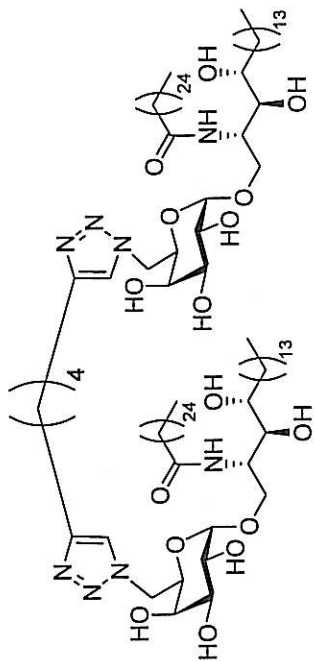

14a, 300 MHz,  
CDCl<sub>3</sub>/CD<sub>3</sub>OD 2:1

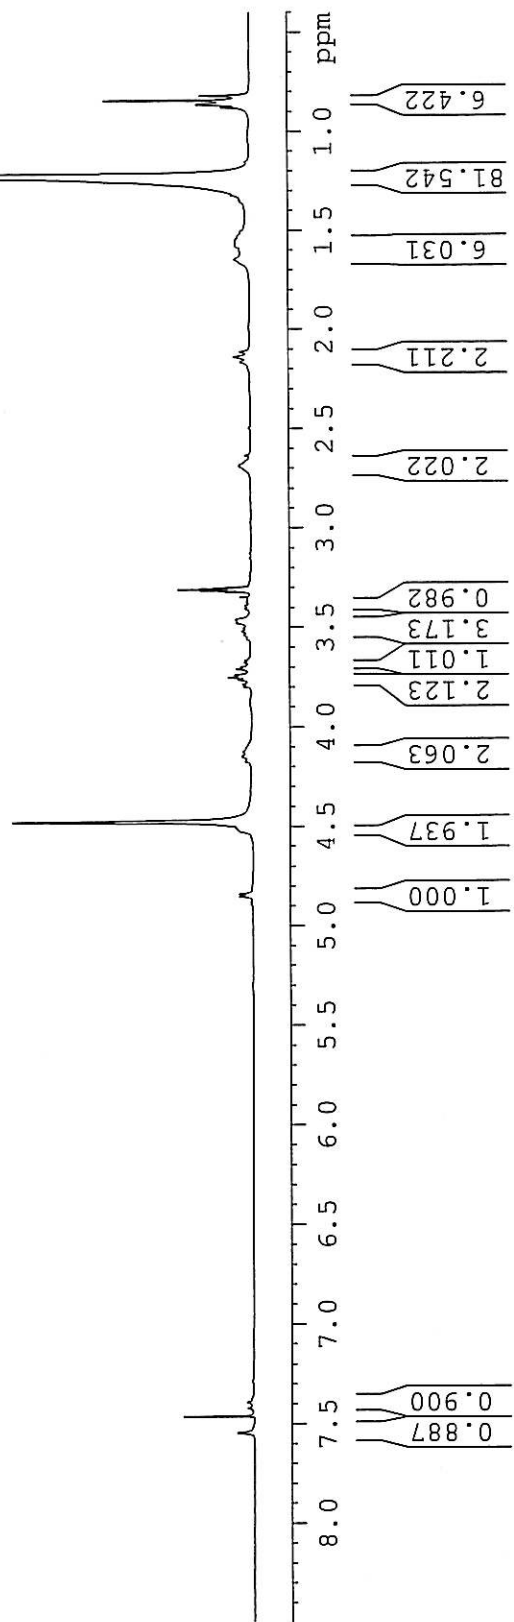

13.420  
 22.197  
 24.480  
 25.266  
 25.410  
 25.454  
 28.204  
 28.899  
 28.959  
 29.015  
 29.219  
 29.266  
 29.404  
 31.472  
 32.159  
 36.009  
 49.701  
 50.192  
 66.819  
 68.236  
 68.848  
 69.006  
 69.494  
 71.503  
 74.282  
 99.237

122.587  
 147.448  
 173.944

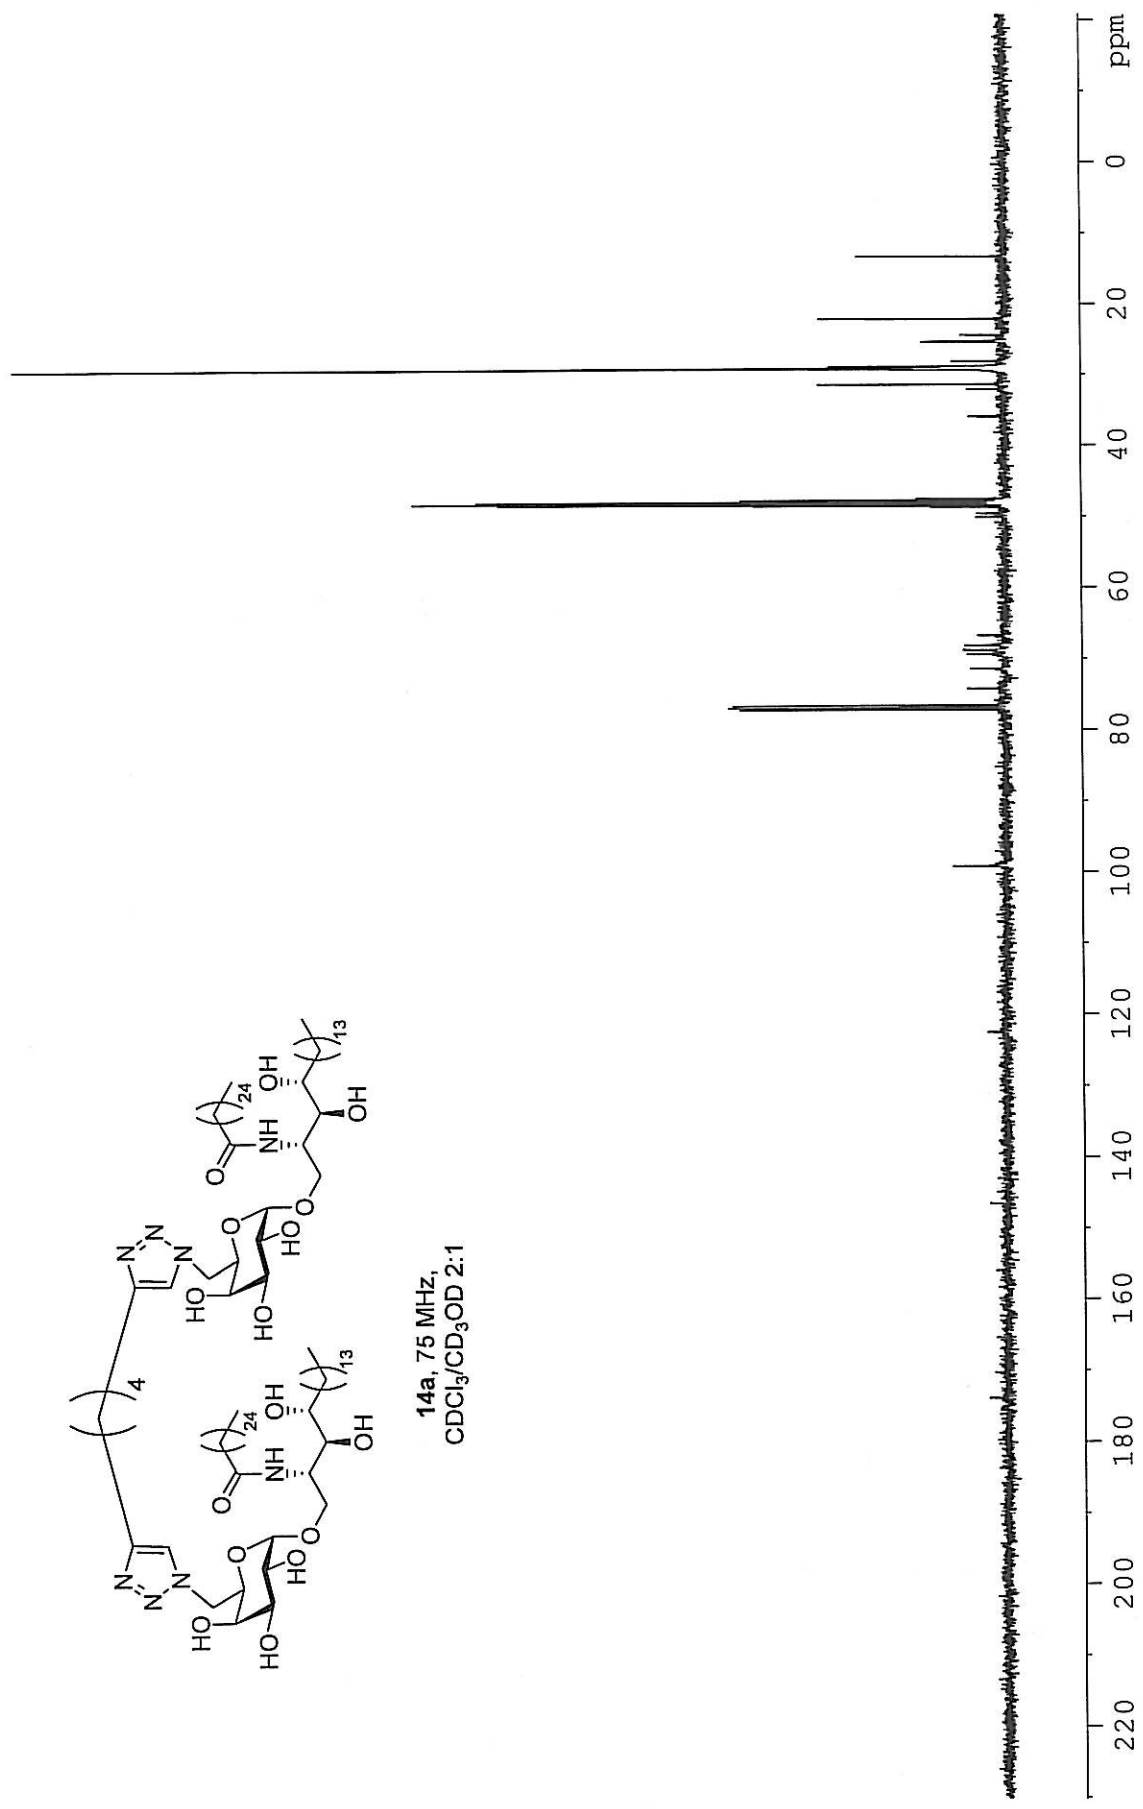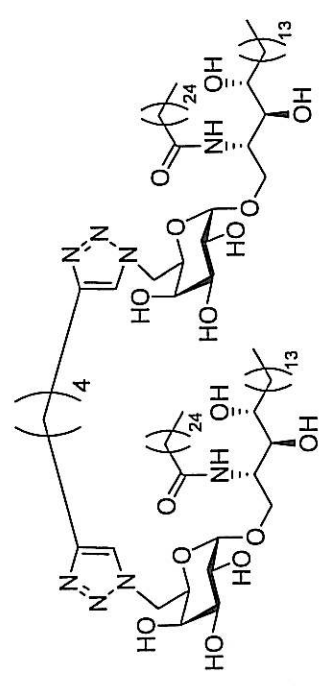

**14a, 75 MHz,**  
**CDCl<sub>3</sub>/CD<sub>3</sub>OD 2:1**

0.828  
 0.851  
 0.872  
 1.167  
 1.205  
 1.234  
 1.299  
 1.569  
 1.593  
 1.621  
 2.117  
 2.142  
 2.167  
 2.629  
 2.653  
 2.677  
 3.370  
 3.376  
 3.381  
 3.404  
 3.415  
 3.480  
 3.514  
 3.689  
 3.714  
 3.723  
 3.766  
 3.779  
 3.787  
 3.811  
 3.811  
 4.105  
 4.118  
 4.146  
 4.170  
 4.192  
 4.504  
 4.528  
 4.542  
 4.565  
 4.859  
 4.870

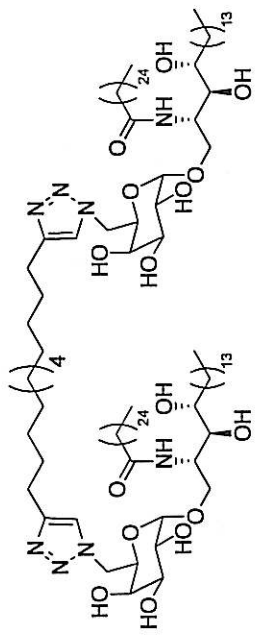

**14b, 300 MHz,**  
**CDCl<sub>3</sub> / CD<sub>3</sub>OD 2:1**

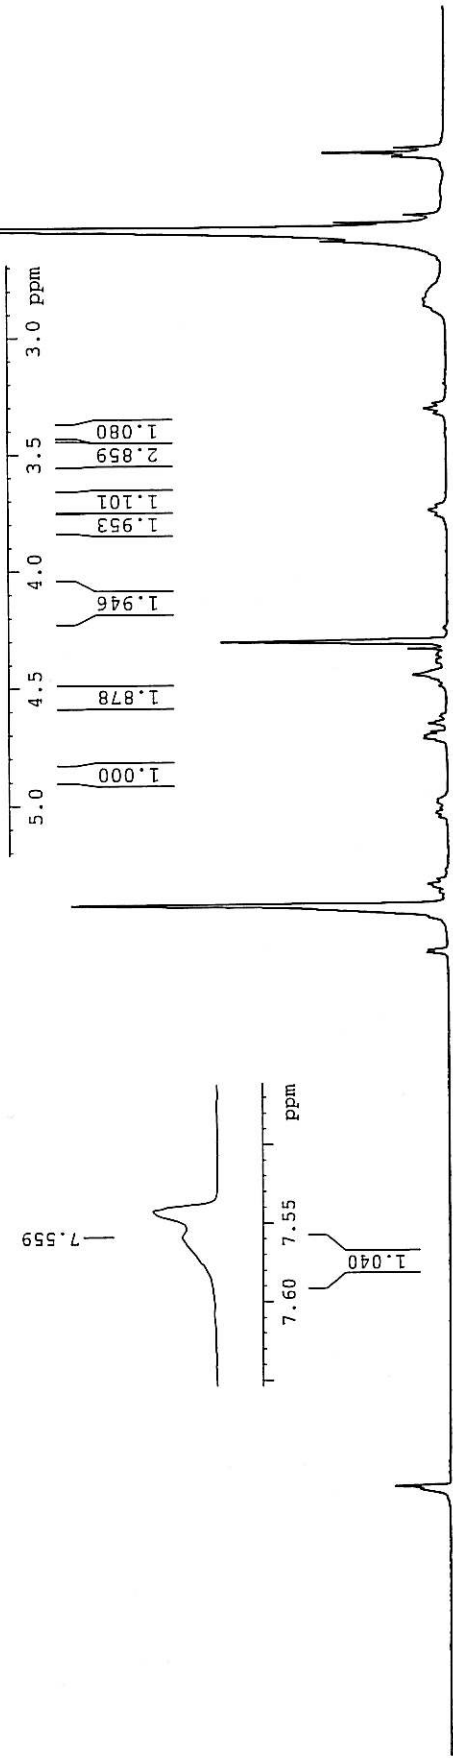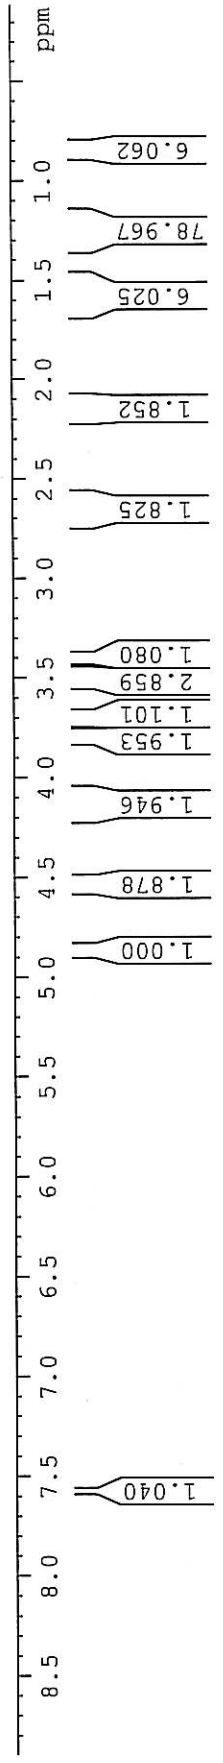

13.123  
 22.006  
 24.750  
 25.238  
 25.284  
 28.716  
 28.762  
 28.825  
 29.028  
 29.073  
 29.140  
 29.204  
 31.299  
 35.777  
 49.535  
 50.201  
 66.351  
 68.087  
 68.883  
 68.974  
 69.358  
 71.259  
 73.988

99.013  
 122.321

147.633  
 174.036

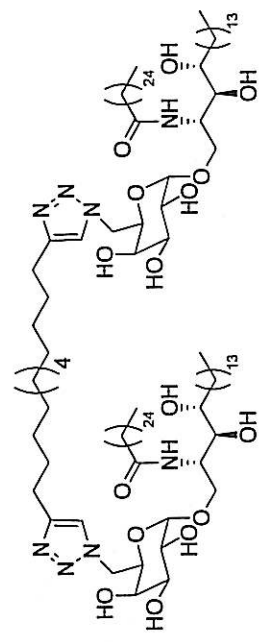

**14b**, 100 MHz,  
 CDCl<sub>3</sub> / CD<sub>3</sub>OD 2:1

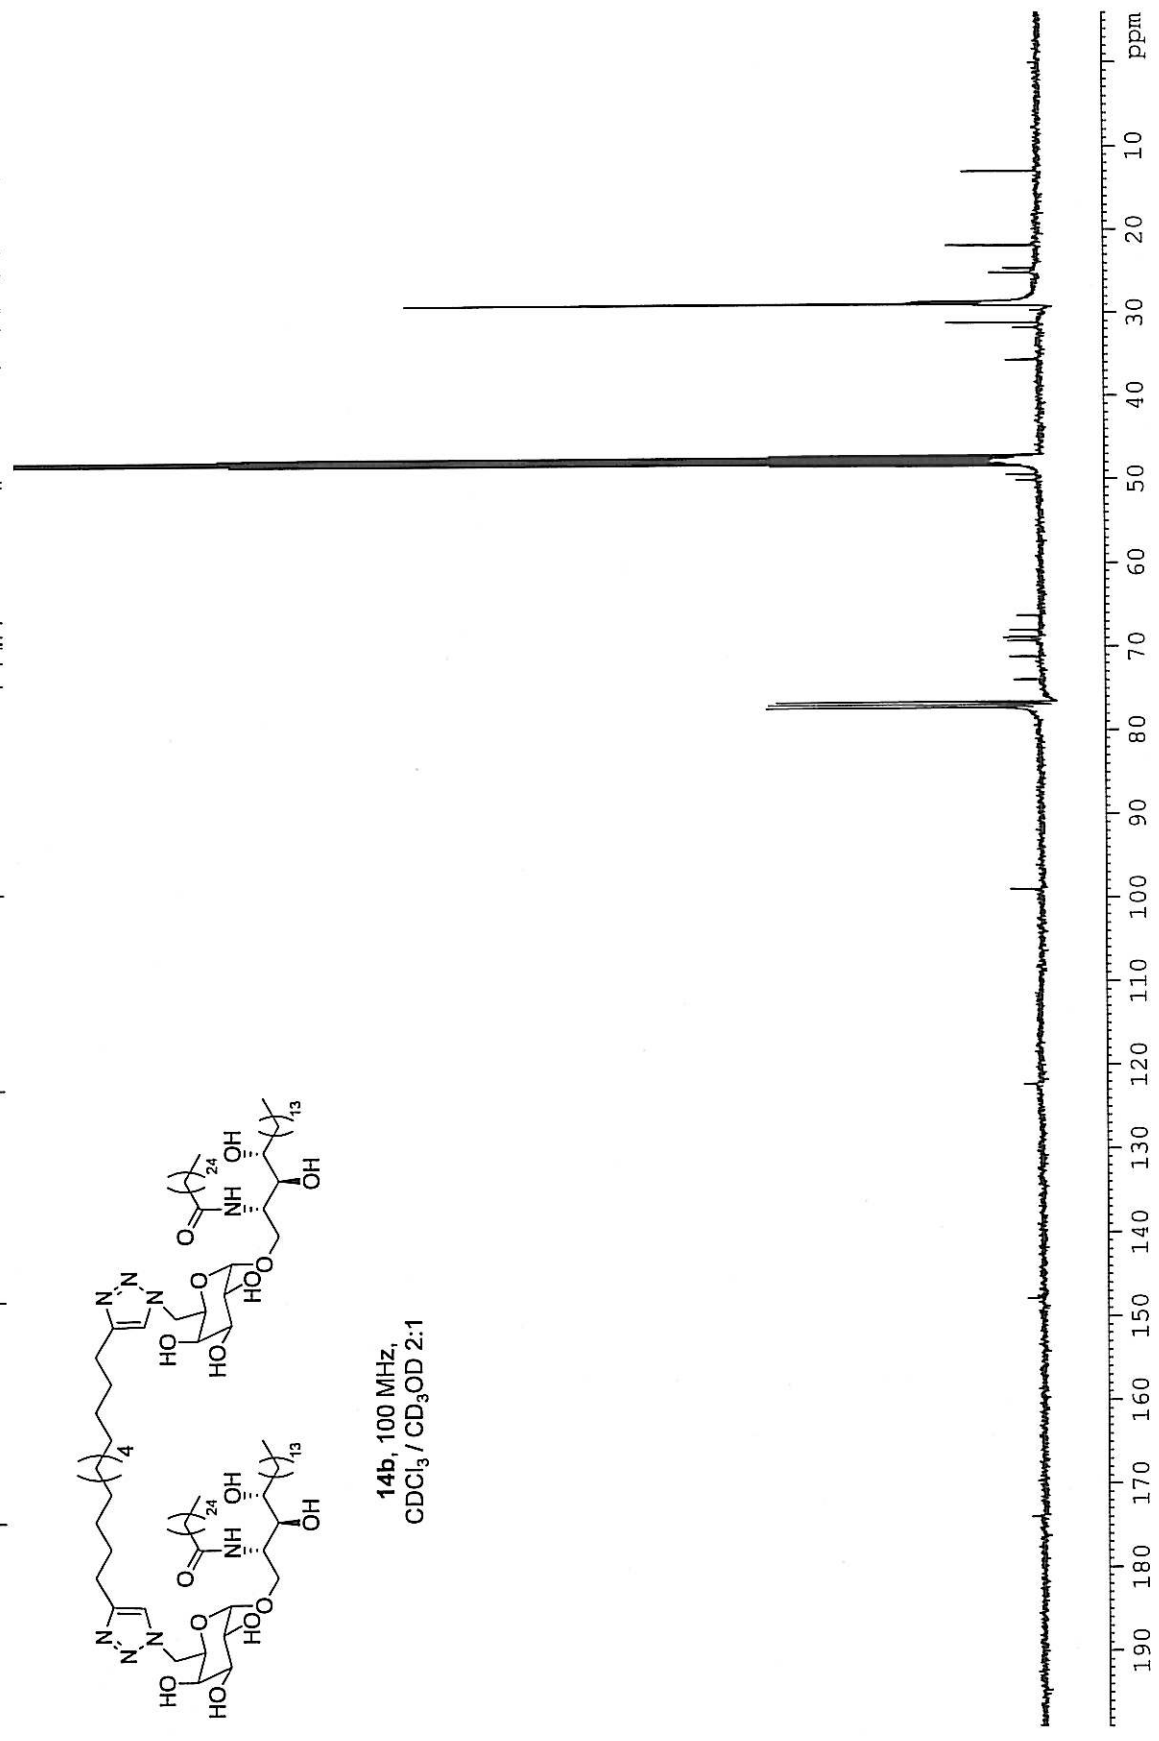

4.871  
4.859  
4.570  
4.541  
4.524  
4.497  
4.477  
4.450  
4.186  
4.140  
4.121  
4.107  
3.811  
3.798  
3.787  
3.778  
3.766  
3.718  
3.708  
3.684  
3.674  
3.530  
3.512  
3.494  
3.473  
3.409  
3.395  
3.375  
3.359  
2.676  
2.648  
2.622  
2.162  
2.136  
2.111  
1.619  
1.595  
1.566  
1.299  
1.233  
1.166  
0.872  
0.851  
0.828

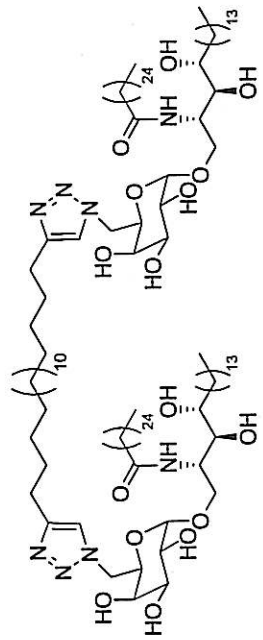

14c, 300 MHz,  
CDCl<sub>3</sub> / CD<sub>3</sub>OD 2:1

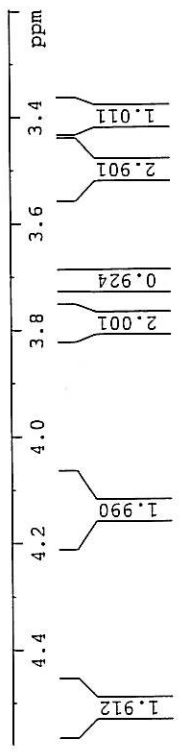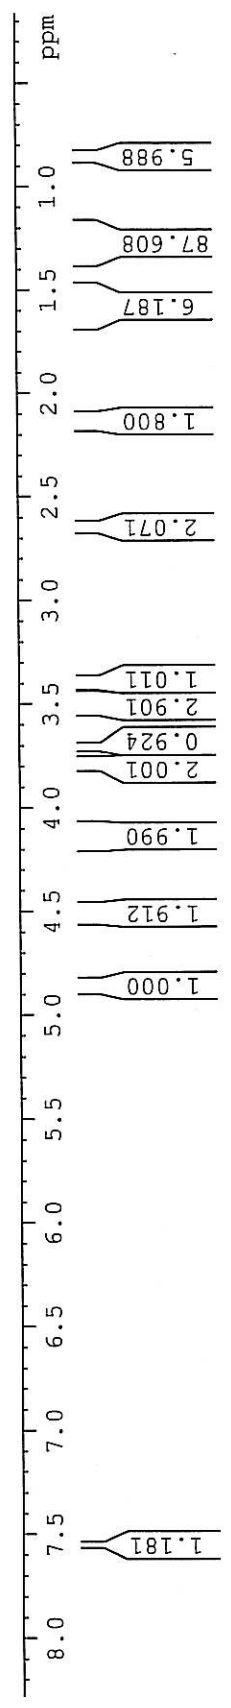



13.210  
 22.064  
 24.837  
 25.281  
 25.322  
 28.771  
 28.824  
 28.866  
 28.922  
 29.000  
 29.085  
 29.134  
 29.260  
 31.352  
 32.042  
 35.839  
 49.570  
 50.204  
 66.378  
 68.137  
 68.908  
 69.020  
 69.423  
 71.297  
 74.130

— 99.057

— 122.199

— 147.663

— 173.800

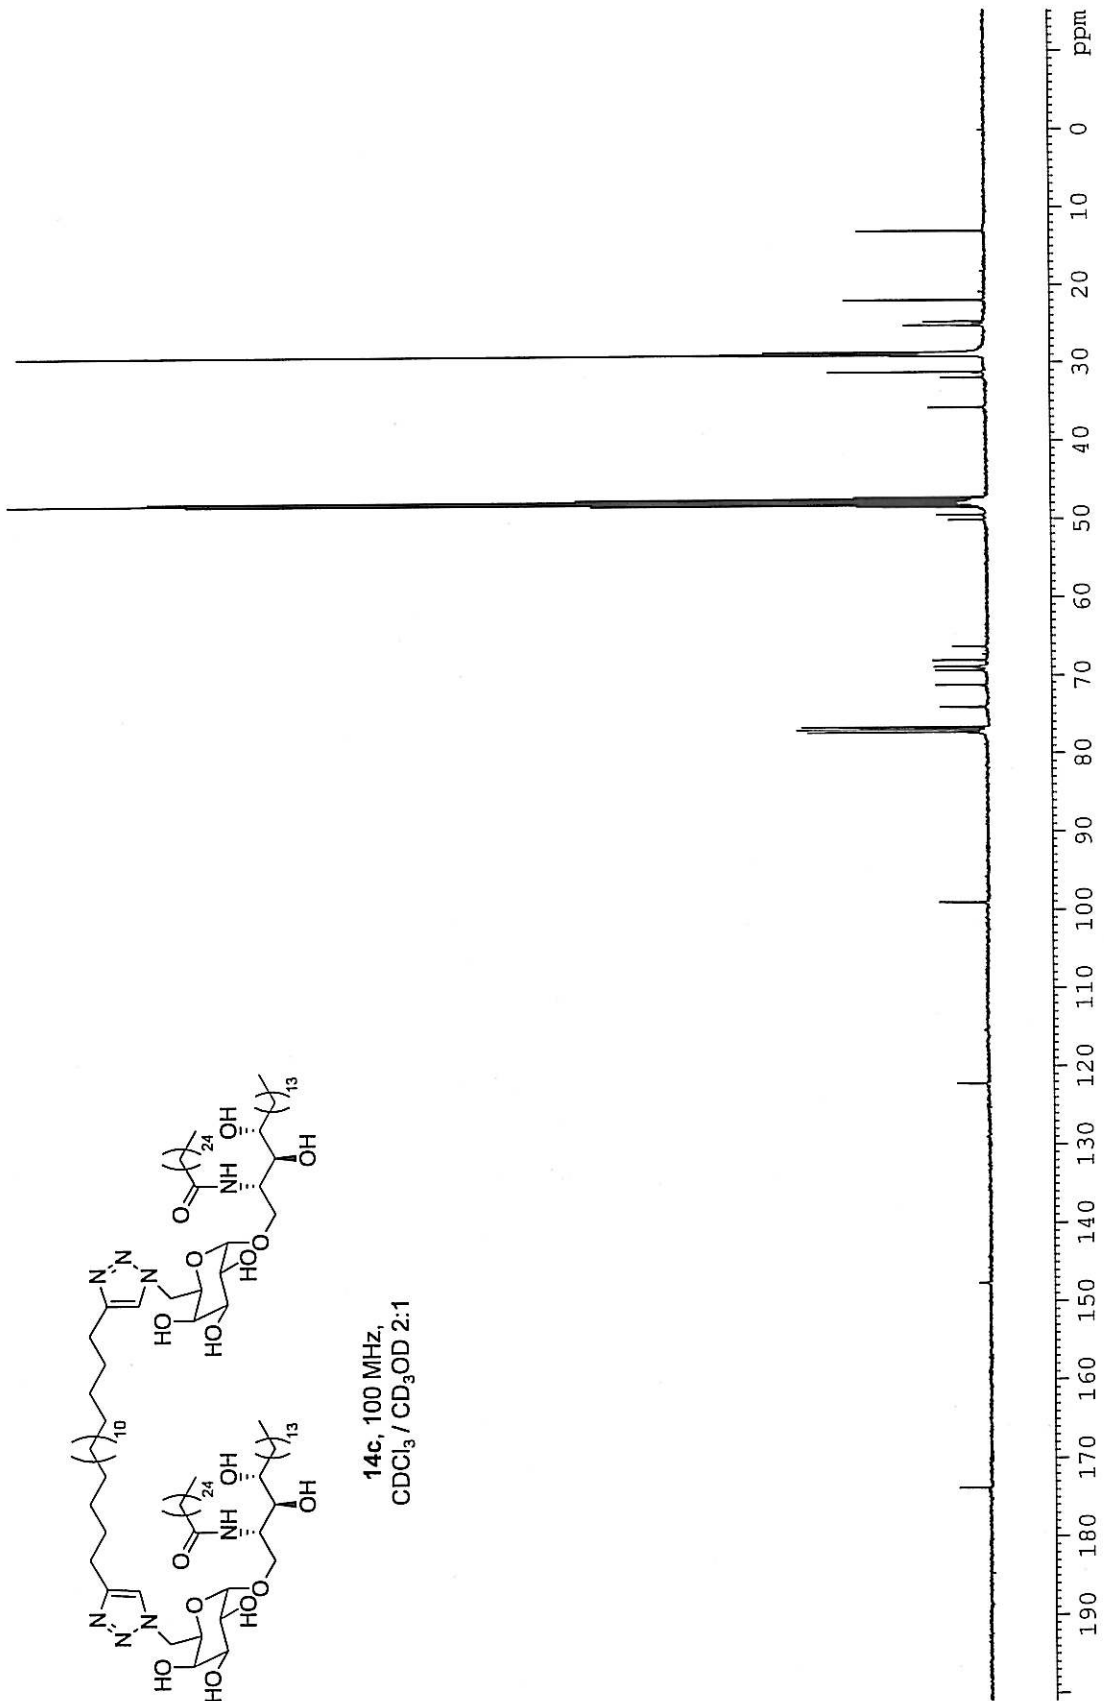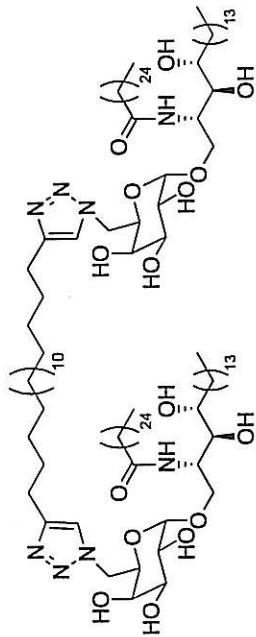

Supplement: mmc1.pdf [file mmc1.pdf]
